# Supplementary material for: The Histone Variant MacroH2A1 Impacts Circadian Gene Expression and Cell Phenotype in an In Vitro Model of Hepatocellular Carcinoma
Source: MDPI journal article supplement (doi:10.3390/biomedicines9081057), 2021-08-20
Supplement: s1 [file s1]

Table S1. Differentially expressed circadian genes sorted in the whole transcriptome of HepG2 cells knocked-down for macroH2A1 and profiled through RNA-Seq in comparison with control HepG2 cells

| Gene ID  | Gene description                                                                          | <i>p</i> -value | Fold change |
|----------|-------------------------------------------------------------------------------------------|-----------------|-------------|
| HSD17B2  | <i>hydroxysteroid (17-beta) dehydrogenase 2</i>                                           | 0.033298        | 263.6635    |
| MPDZ     | <i>multiple PDZ domain crumbs cell polarity complex component</i>                         | 0.046816        | 76.82502    |
| ABCG5    | <i>ATP-binding cassette. sub-family g (white). member 5</i>                               | 0.040097        | 16.35242    |
| SGTB     | <i>small glutamine-rich tetratricopeptide repeat (tpr)-containing. beta</i>               | 0.047386        | 3.093502    |
| SERPINH1 | <i>serine (or cysteine) peptidase inhibitor. clade H. member 1</i>                        | 0.047949        | 2.80151     |
| ACOX2    | <i>acyl-coenzyme a oxidase 2. branched chain</i>                                          | 0.018885        | 2.498472    |
| CD164    | <i>sialomucin core protein 24 (endolyn)</i>                                               | 0.024452        | 2.268357    |
| OAT      | <i>ornithine aminotransferase</i>                                                         | 0.023627        | 2.018097    |
| SYAP1    | <i>synapse associated protein 1</i>                                                       | 0.014185        | 2.008324    |
| C16orf87 | <i>chromosome 16 open reading frame 87</i>                                                | 0.015596        | 1.947027    |
| ELF1     | <i>e74-like factor 1</i>                                                                  | 0.026288        | 1.941783    |
| MMD      | <i>monocyte to macrophage differentiation-associated</i>                                  | 0.031814        | 1.913883    |
| SCARB2   | <i>scavenger receptor class B. member 2</i>                                               | 0.036201        | 1.849744    |
| PAH      | <i>phenylalanine hydroxylase</i>                                                          | 0.030445        | 1.816262    |
| ARL1     | <i>ADP-ribosylation factor-like 1</i>                                                     | 0.002337        | 1.81595     |
| SAR1B    | <i>SAR1 gene homolog b (s. cerevisiae)</i>                                                | 0.034401        | 1.722179    |
| SERP1    | <i>stress-associated endoplasmic reticulum protein 1</i>                                  | 0.028741        | 1.687226    |
| OSTC     | <i>oligosaccharyltransferase complex subunit</i>                                          | 0.042151        | 1.667932    |
| TM9SF2   | <i>transmembrane 9 superfamily member 2</i>                                               | 0.028584        | 1.664967    |
| SSR3     | <i>signal sequence receptor. gamma</i>                                                    | 0.019285        | 1.65734     |
| RIOK2    | <i>rio kinase 2 (yeast)</i>                                                               | 0.016325        | 1.567359    |
| C16orf72 | <i>chromosome 16 open reading frame 72</i>                                                | 0.015424        | 1.527632    |
| PER1     | <i>period homolog 1 (drosophila)</i>                                                      | 0.006832        | 1.51221     |
| RTN3     | <i>reticulon 3</i>                                                                        | 0.011982        | -1.50179    |
| KLHL7    | <i>kelch-like 7 (drosophila)</i>                                                          | 0.021659        | -1.51883    |
| ARL4A    | <i>ADP-ribosylation factor-like 4a</i>                                                    | 0.031309        | -1.57754    |
| VPS41    | <i>vacuolar protein sorting 41 (yeast)</i>                                                | 0.037859        | -1.64827    |
| WDR91    | <i>WD repeat domain 91</i>                                                                | 0.011823        | -1.65977    |
| AQP11    | <i>aquaporin 11</i>                                                                       | 0.045677        | -1.70335    |
| TIFA     | <i>traf-interacting protein with forkhead-associated domain</i>                           | 0.015102        | -1.73665    |
| TTC19    | <i>tetratricopeptide repeat domain 19</i>                                                 | 0.030689        | -1.76779    |
| MYO5B    | <i>myosin Vb</i>                                                                          | 0.01665         | -1.77951    |
| GNA12    | <i>guanine nucleotide binding protein. alpha 12</i>                                       | 0.020672        | -1.788      |
| FECH     | <i>ferrochelatase</i>                                                                     | 0.04973         | -1.80066    |
| SNX5     | <i>sorting nexin 5</i>                                                                    | 0.044838        | -1.83988    |
| C5orf30  | <i>chromosome 5 open reading frame 30 (MACIR - macrophage immunometabolism regulator)</i> | 0.009526        | -2.01614    |
| IFIH1    | <i>interferon induced with helicase c domain 1</i>                                        | 0.020856        | -2.01981    |
| SPTBN1   | <i>spectrin beta. non-erythrocytic 1</i>                                                  | 0.003645        | -2.07228    |

|          |                                                                                                |          |          |
|----------|------------------------------------------------------------------------------------------------|----------|----------|
| PDGFC    | <i>platelet-derived growth factor. c polypeptide</i>                                           | 0.02281  | -2.1033  |
| MAP2K3   | <i>mitogen-activated protein kinase kinase 3</i>                                               | 0.039758 | -2.15536 |
| RORC     | <i>rar-related orphan receptor gamma</i>                                                       | 0.017741 | -2.2504  |
| BAAT     | <i>bile acid-coenzyme a: amino acid n-acyltransferase</i>                                      | 0.010839 | -2.51111 |
| SLC27A2  | <i>solute carrier family 27 (fatty acid transporter). member 2</i>                             | 0.047782 | -2.56038 |
| ID2      | <i>inhibitor of dna binding 2</i>                                                              | 0.038002 | -2.61672 |
| SOD2     | <i>superoxide dismutase 2. mitochondrial</i>                                                   | 0.018167 | -2.67649 |
| IL18     | <i>interleukin 18</i>                                                                          | 0.031359 | -2.69189 |
| F3       | <i>coagulation factor iii</i>                                                                  | 0.015085 | -4.30378 |
| SERPINE2 | <i>serine (or cysteine) peptidase inhibitor. clade e. member 2</i>                             | 0.016606 | -5.82444 |
| C8orf4   | <i>chromosome 8 open reading frame 4 (TCIM - transcriptional and immune response regulator</i> | 0.016299 | -5.93032 |
| ARSG     | <i>arylsulfatase g</i>                                                                         | 0.025216 | -6.0746  |
| SH3BGR12 | <i>SH3 domain binding glutamic acid-rich protein like 2</i>                                    | 0.038313 | -6.24096 |
| PIK3AP1  | <i>phosphoinositide-3-kinase adaptor protein 1</i>                                             | 0.031764 | -7.32897 |
| RGS2     | <i>regulator of g-protein signaling 2</i>                                                      | 0.011005 | -7.45041 |
| MT1F     | <i>metallothionein 1f</i>                                                                      | 0.037504 | -8.2128  |
| CDH2     | <i>cadherin 2</i>                                                                              | 0.015223 | -8.30998 |
| SAA4     | <i>serum amyloid a 4</i>                                                                       | 0.041197 | -8.42766 |
| ABCG2    | <i>ATP-binding cassette. sub-family g (white). member 2</i>                                    | 0.049408 | -10.4263 |
| CPT1A    | <i>carnitine palmitoyltransferase 1a. liver</i>                                                | 0.03947  | -10.5143 |
| CMPK2    | <i>cytidine monophosphate (ump-cmp) kinase 2. mitochondrial</i>                                | 0.020668 | -10.7883 |
| BHMT2    | <i>betaine-homocysteine methyltransferase 2</i>                                                | 0.011336 | -13.1606 |
| NR3C2    | <i>nuclear receptor subfamily 3. group c. member 2</i>                                         | 0.027234 | -13.7428 |
| HOMER2   | <i>homer homolog 2 (drosophila)</i>                                                            | 0.048467 | -21.43   |
| BHMT     | <i>betaine-homocysteine methyltransferase</i>                                                  | 0.006191 | -25.7045 |
| RNF144A  | <i>ring finger protein 144a</i>                                                                | 0.040718 | -27.3101 |
| RHBDD1   | <i>rhomboid domain containing 1</i>                                                            | 0.042967 | -29.9971 |
| CYP7A1   | <i>cytochrome p450. family 7. subfamily a. polypeptide1</i>                                    | 0.033018 | -31.383  |
| SPARC    | <i>secreted acidic cysteine rich glycoprotein</i>                                              | 0.046717 | -36.121  |
| CDO1     | <i>cysteine dioxygenase 1. cytosolic</i>                                                       | 0.038785 | -60.5354 |
| GNG12    | <i>guanine nucleotide binding protein (g protein). gamma 12</i>                                | 0.000291 | -115.271 |

| Supplementary Table S2. Ingenuity Canonical Pathways significantly enriched                                                                                                                                                                                                                                                                              |               |         |                                                                                                                                                  |
|----------------------------------------------------------------------------------------------------------------------------------------------------------------------------------------------------------------------------------------------------------------------------------------------------------------------------------------------------------|---------------|---------|--------------------------------------------------------------------------------------------------------------------------------------------------|
| Pathway                                                                                                                                                                                                                                                                                                                                                  | -log(p-value) | z-score | Molecules                                                                                                                                        |
| Superpathway of Methionine Degradation                                                                                                                                                                                                                                                                                                                   | 2.49E00       | 2.236   | AHCY,BHMT,BHMT2,CDO1,MRM2                                                                                                                        |
| PTEN Signaling                                                                                                                                                                                                                                                                                                                                           | 2.1E00        | 1.667   | FGFR2,FOXO3,GSK3A,HRAS,MAGI3,PDGFRB,PDPK1,PIK3CA,YWHAH                                                                                           |
| NRF2-mediated Oxidative Stress Response                                                                                                                                                                                                                                                                                                                  | 2.66E00       | 1.414   | CCT7,DNAJB1,DNAJC5,FMO1,GCLC,GSTM2,HRAS,KEAP1,MAP2K3,MAP3K7,PIK3CA,SOD2,STIP1                                                                    |
| ERK5 Signaling                                                                                                                                                                                                                                                                                                                                           | 1.32E00       | 1.342   | FOXO3,GNA12,HRAS,MEF2A,YWHAH                                                                                                                     |
| Actin Nucleation by ARP-WASP Complex                                                                                                                                                                                                                                                                                                                     | 1.32E00       | 1.342   | GNA12,HRAS,PPP1R12A,RHOD,ROCK1                                                                                                                   |
| Cholecystokinin/Gastrin-mediated Signaling                                                                                                                                                                                                                                                                                                               | 1.34E00       | 1.134   | GNA12,HRAS,IL18,MAP2K3,MEF2A,RHOD,ROCK1                                                                                                          |
| Heme Biosynthesis II                                                                                                                                                                                                                                                                                                                                     | 4.2E00        | 1       | ALAS1,FECH,PPOX,UROD                                                                                                                             |
| Inhibition of ARE-Mediated mRNA Degradation Pathway                                                                                                                                                                                                                                                                                                      | 2.19E00       | 1       | CNOT4,CNOT6,EXOSC2,MAP3K7,PPP2R1A,PRKAR2A,PSME2,PSMF1,YWHAH                                                                                      |
| IL-1 Signaling                                                                                                                                                                                                                                                                                                                                           | 1.41E00       | 1       | GNA12,GNG12,MAP2K3,MAP3K7,NFKBIA,PRKAR2A                                                                                                         |
| Fatty Acid Activation                                                                                                                                                                                                                                                                                                                                    | 3.48E00       | -1      | ACSL3,ACSL4,ACSL5,SLC27A2                                                                                                                        |
| Bile Acid Biosynthesis, Neutral Pathway                                                                                                                                                                                                                                                                                                                  | 3.48E00       | -1      | AKR1D1,BAAT,CYP7A1,HSD3B7                                                                                                                        |
| PPAR Signaling                                                                                                                                                                                                                                                                                                                                           | 2.65E00       | -1      | CITED2,HRAS,IL18,MAP3K7,NCOA1,NFKBIA,NRIP1,PDGFC,PDGFRB                                                                                          |
| Senescence Pathway                                                                                                                                                                                                                                                                                                                                       | 2.4E00        | -1      | CAPN2,DMTF1,E2F5,EIF4EBP1,ELF1,FOXO3,HRAS,KAT2B,MAP2K3,MAP3K7,PIK3CA,PPP2R1A,SAA4,SMAD7,SOD2,YPEL3                                               |
| Cardiac $\beta$ -adrenergic Signaling                                                                                                                                                                                                                                                                                                                    | 2.26E00       | -1.134  | AKAP11,AKAP9,GNG12,PDE2A,PDE9A,PKIG,PPP1R12A,PPP1R14B,PPP2R1A,PRKAR2A                                                                            |
| Fatty Acid $\beta$ -oxidation I                                                                                                                                                                                                                                                                                                                          | 2.78E00       | -1.342  | ACSL3,ACSL4,ACSL5,AUH,SLC27A2                                                                                                                    |
| Intrinsic Prothrombin Activation Pathway                                                                                                                                                                                                                                                                                                                 | 2.25E00       | -1.342  | COL5A3,F11,FGA,FGB,FGG                                                                                                                           |
| Stearate Biosynthesis I (Animals)                                                                                                                                                                                                                                                                                                                        | 2.08E00       | -1.342  | ACSL3,ACSL4,ACSL5,ELOVL6,SLC27A2                                                                                                                 |
| ErbB2-ErbB3 Signaling                                                                                                                                                                                                                                                                                                                                    | 1.49E00       | -1.342  | ERBB3,GSK3A,HRAS,PDPK1,PIK3CA                                                                                                                    |
| Autophagy                                                                                                                                                                                                                                                                                                                                                | 2.87E00       | -1.342  | ATG3,ATG7,CTSH,MAP1LC3B,RB1CC1,ULK1,VPS11                                                                                                        |
| Sirtuin Signaling Pathway                                                                                                                                                                                                                                                                                                                                | 5.21E00       | -1.414  | ACLY,ACSS2,ATG3,ATG4D,CDH1,CLOCK,CPT1A,ESRRA,FOXO3,G6PD,GABARAP,GTF3C2,MAP1LC3B,NDUFA12,NDUFA9,NDUFB9,NDUFS8,NR1H4,PPIF,SIRT5,SOD2,TIMM10,TIMM44 |
| Hepatic Fibrosis Signaling Pathway                                                                                                                                                                                                                                                                                                                       | 1.87E00       | -1.414  | COL5A3,DVL1,HRAS,IL18,JAK2,KLF9,MAP2K3,MAP3K7,NFKBIA,PDGFC,PDGFRB,PIK3CA,PRKAR2A,RHOD,ROCK1,SMAD7,SOD2,WNT5B                                     |
| Type II Diabetes Mellitus Signaling                                                                                                                                                                                                                                                                                                                      | 2.23E00       | -1.633  | ACSL3,ACSL4,ACSL5,IRS1,MAP3K7,NFKBIA,PDPK1,PIK3CA,SLC27A2,SLC2A2                                                                                 |
| GP6 Signaling Pathway                                                                                                                                                                                                                                                                                                                                    | 1.77E00       | -2.828  | COL27A1,COL5A3,FGA,FGB,FGG,GSK3A,PDPK1,PIK3CA                                                                                                    |
| An increase in the Z-score value indicates pathway activation, while the decrease in the Z-score indicates pathway inhibition. On a logarithmic scale (-log (p-value)) a P-value equal to 0.05 corresponds to 1.3 and the statistical significance of the result increases with the decrease in p-value and with the increase in - log (p-value) values. |               |         |                                                                                                                                                  |

Supplementary Table S3: Significantly deregulated functions

| Categories                                                                                      | Function      | Diseases Or Functions Annotation | P-Value  | Z-Score | Molecules                                                                                                                                                                                                                                                                                                                                                                         |    |
|-------------------------------------------------------------------------------------------------|---------------|----------------------------------|----------|---------|-----------------------------------------------------------------------------------------------------------------------------------------------------------------------------------------------------------------------------------------------------------------------------------------------------------------------------------------------------------------------------------|----|
| Cell Cycle                                                                                      | Interphase    | Interphase                       | 2.45E-04 | 2.587   | ABCB1,AKAP9,BAP1, BID,CAMKK2,CDH1, CEBPD,CES1,CYLD, DCTN1,DGKZ,DMTF 1,DPP4,E2F5,EGR1, EIF4EBP1,ERBB3,ES RRA,FOXO3,GNA12, HRAS,HSPB1,ID2,ID 4,ING4,IRS1,JAK2,KI TLG,KLF12,KPNB1,L MNA,LPIN1,MAP2K3, MRNIP,NET1,NFKBI A,NRIP1,OGA,POLE4 ,PPIF,PPM1A,PPP1R 12A,PPP2R1A,PRPF 19,PSEN2,RASSF3,R B1CC1,RPA1,SMAD7 ,SOD2,TCP1,TUBB CPT1A,DNAJB1,F2R, FKBP4,IRS1,NR1H4, NR3C2,SIRT5,STIP1 | 52 |
| Lipid Metabolism, Small Molecule Biochemistry                                                   | Binding       | Binding Of Lipid                 | 1.02E-03 | 2.414   | ABCB1,BIK,CAPN2,C D47,DHX9,ENDOG,H RAS,HSPB1,KEAP1, KITLG,KPNB1,NFKBI A,PIK3CA,PRDX6,SO D2,STK24,VPS13A                                                                                                                                                                                                                                                                           | 9  |
| DNA Replication, Recombination, And Repair                                                      | Degradation   | Degradation Of DNA               | 2.41E-04 | 2.253   | ABCB1,BIK,CAPN2,C D47,DHX9,ENDOG,H RAS,HSPB1,KEAP1, KITLG,KPNB1,NFKBI A,PIK3CA,PRDX6,SO D2,STK24,VPS13A                                                                                                                                                                                                                                                                           | 17 |
| Cell Death And Survival,DNA Replication, Recombination, And Repair                              | Fragmentation | Fragmentation Of DNA             | 4.78E-04 | 2.174   | ABCB1,BIK,CAPN2,E NDOG,HRAS,HSPB1, KEAP1,KITLG,KPNB 1,NFKBIA,PIK3CA,P RDX6,SOD2,STK24, VPS13A                                                                                                                                                                                                                                                                                     | 15 |
| DNA Replication, Recombination, And Repair,Nucleic Acid Metabolism, Small Molecule Biochemistry | Hydrolysis    | Hydrolysis Of Nucleotide         | 1.04E-04 | 1.873   | ABCG2,ANXA7,ATP1 A1,CCT4,CCT5,ITPA, N4BP2,NME1,PDE2A ,PDE9A,RAN,SNRNP 200,TBC1D16                                                                                                                                                                                                                                                                                                 | 13 |
| Infectious Diseases                                                                             | Infection     | Infection Of Cells               | 1.20E-04 | 1.649   | AFG3L2,ARGLU1,CA MKK2,CBLB,CD164, CDH1,CLDND1,CLO CK,CLTA,CXADR,CY B5B,DCTN1,DHX9,D NAJB1,DPP4,DVL1,F 2R,F3,FAM172A,FAM 76B,FPGS,GABARAP ,GPD2,HMGCR,HRA S,IL18,KLHDC2,KPN B1,LIN7C,LSM14B,M AP3K7,MPDZ,MRPL4 4,NUP62,PER3,PNR C1,PRPF6,PSEN2,P SME2,RAB1B,RABE PK,RB1CC1,REPIN1, SBF2,SLC10A1,SLC2 0A1,SPTBN1,ST3GA L4,STARD3NL,STIP1                                            | 52 |

|                                                              |                                   |                                   |          |       |                                                                                                                                                                                                                                                                                                                                      |    |
|--------------------------------------------------------------|-----------------------------------|-----------------------------------|----------|-------|--------------------------------------------------------------------------------------------------------------------------------------------------------------------------------------------------------------------------------------------------------------------------------------------------------------------------------------|----|
| Infectious Diseases                                          | Infection                         | Infection By HIV-1                | 5.78E-04 | 1.399 | ,UBE2L3,UNG<br>AFG3L2,ARGLU1,CA<br>MKK2,CD164,CLDND<br>1,CLOCK,CLTA,DHX<br>9,DNAJB1,DPP4,DVL<br>1,FAM172A,FAM76B,<br>FPGS,GABARAP,GP<br>D2,IL18,KLHDC2,KP<br>NB1,LIN7C,LSM14B,<br>MAP3K7,MPDZ,MRP<br>L44,NUP62,PER3,PN<br>RC1,PRPF6,PSEN2,<br>PSME2,RAB1B,RAB<br>EPK,RB1CC1,REPIN<br>1,SBF2,SPTBN1,STA<br>RD3NL,STIP1,UBE2L<br>3,UNG | 40 |
| Cellular Development                                         | Epithelial-Mesenchymal Transition | Epithelial-Mesenchymal Transition | 9.41E-04 | 1.376 | AHNAK,ARHGAP21,<br>CDH1,DICER1,ERBB<br>3,FGFR2,FOXO3,HO<br>OK1,HRAS,IRS1,MA<br>CROH2A1,MEF2A,N<br>COA1,NFKBIA,PDLI<br>M1,PDPK1,PIK3CA,P<br>RKAR2A,RICTOR,SM<br>AD7                                                                                                                                                                   | 20 |
| Cellular Assembly And Organization                           | Development                       | Development Of Cytoplasm          | 1.26E-05 | 1.371 | AKAP11,AKAP9,ARH<br>GAP18,ARHGAP6,AT<br>G3,CD47,CIB3,CNP,<br>COL5A3,CUL4B,DCT<br>N1,DMD,DSTN,F2R,F<br>KBP4,GDA,GNA12,G<br>NG12,HRAS,IRS1,M<br>PRIP,NET1,NRIP1,P<br>DPK1,PES1,PEX26,P<br>EX6,PLD1,PPP1R9A,<br>RB1CC1,RHOD,RICT<br>OR,ROCK1,SDC4,SN<br>X9,SPARC,STXBP3,<br>TMEM41B,TUBB,ULK<br>1,UTRN,WIP1                             | 42 |
| Cardiovascular Disease, Organismal Injury And Abnormalities  | Fibrosis                          | Fibrosis Of Heart                 | 3.21E-05 | 1.315 | DICER1,DMD,DSP,E<br>GR1,F11,F3,GAS2L3,<br>GSK3A,HRAS,LMNA,<br>MBNL2,NR3C2,PDE9<br>A,PDGFC,PFKFB1,PI<br>K3CA,PNKD,ROCK1,<br>SOD2,UTRN                                                                                                                                                                                                 | 20 |
| Cell Death And Survival, Organismal Injury And Abnormalities | Necrosis                          | Necrosis Of Epithelial Tissue     | 3.51E-04 | 1.275 | ABCG2,ARHGAP18,<br>BID,BIK,CA3,CDH1,C<br>DH2,CEBPD,CITED2,<br>CNP,CUL4B,CYLD,C<br>YP7A1,DICER1,EGR<br>1,ENDOG,ERBB3,F3,<br>FKBP4,FOXO3,GSD<br>MD,HRAS,HSPB1,ID<br>2,IL18,ING4,IRS1,JA<br>K2,MAP2K3,NCOA1,<br>NFKBIA,NR1H4,PDG<br>FRB,PDPK1,PPM1A,<br>PRDX6,RB1CC1,SLC<br>20A1,SOD2,SPARC,                                            | 42 |

|                                           |                |                                      |          |       |                                                                                                                                                                                                                                                                                                                                                                                                                                                                                                                                  |    |
|-------------------------------------------|----------------|--------------------------------------|----------|-------|----------------------------------------------------------------------------------------------------------------------------------------------------------------------------------------------------------------------------------------------------------------------------------------------------------------------------------------------------------------------------------------------------------------------------------------------------------------------------------------------------------------------------------|----|
| Cell Death And Survival                   | Cell Death     | Cell Death Of Leukemia Cell Lines    | 6.49E-04 | 1.138 | SPTBN1,TRIB3<br>ABCB1,ABCB4,BID,BIK,CD47,CDH1,CEBP<br>D,CYLD,DICER1,DP<br>P4,EIF4EBP1,FOXO3<br>,HLF,HSPB1,JAK2,KI<br>TLG,MAP1LC3B,NFK<br>BIA,NR3C2,PDGFC,P<br>PP1R1B,RCAN1,RIC<br>TOR,SOD2,TUBB6,V<br>PS13A                                                                                                                                                                                                                                                                                                                      | 26 |
| Cell Death And Survival                   | Apoptosis      | Apoptosis Of Mesothelioma Cell Lines | 5.12E-04 | 1.131 | BAP1,BID,BIK,DVL1,<br>PDPK1                                                                                                                                                                                                                                                                                                                                                                                                                                                                                                      | 5  |
| Cellular Compromise,Inflammatory Response | Degranulation  | Degranulation Of Phagocytes          | 4.59E-04 | 1.117 | ACLY,AGPAT2,ATP6<br>V1D,CD47,CD9,CDA,<br>CMTM6,CORO1B,CT<br>SH,DGKZ,DNAJC5,D<br>SP,GSDMD,GYG1,K<br>CMF1,KITLG,KPNB1,<br>LPIN1,PDPK1,PLD1,<br>PRDX6,PSMD1,PSM<br>D11,PSMD2,ROCK1,<br>SLC27A2,SLC2A5,SL<br>C9A3R1,STOM,STXB<br>P3,TMBIM1,TRIB3,T<br>UBB                                                                                                                                                                                                                                                                            | 33 |
| Organismal Injury And Abnormalities       | Benign Lesion  | Benign Lesion                        | 1.13E-06 | 1.098 | ABCB1,ABCG2,AHN<br>AK,ANXA7,ARIH2,AT<br>P1A1,BAP1,BDH1,BH<br>MT,BID,C9orf16,CDH<br>1,CDH2,CEBPD,CLM<br>N,CNP,COL27A1,CO<br>L5A3,CYLD,DICER1,<br>DMD,DMTF1,DVL1,E<br>GR1,EIF4EBP1,ERB<br>B3,FGFR2,FH,FLCN,<br>FOXO3,GSK3A,HRA<br>S,ICK,ID4,ING4,KDM<br>6A,KITLG,LRIG1,MLX<br>,NHLRC2,NINJ1,NR1<br>H4,NR3C2,NR5A2,N<br>RIP1,NUDT1,OAZ1,O<br>SBPL1A,PDGFC,PD<br>GFRB,PGAP1,PIK3C<br>A,PKHD1,POR,PRDX<br>6,PSEN2,PSMA6,SE<br>RPINE2,SLC2A5,SLC<br>30A10,SOD2,SPON2,<br>SPOP,SPTBN1,SYN<br>E1,TRIB3,UBAC1,UG<br>P2,UNG,UTRN,WNT5<br>B | 71 |
| Cell Death And Survival                   | Cell Viability | Cell Viability Of Tumor Cell Lines   | 1.27E-08 | 1.093 | ABCB1,ABCG2,ACSL<br>5,ATG3,BID,BUD23,C<br>AMKK2,CAPN2,CAR<br>S1,CDH1,CDH2,CEB<br>PD,CES1,DHX9,DIO1<br>,DPP4,DPP9,DUSP1<br>9,EGR1,ERBB3,ESR<br>RA,FBXO9,FGFR2,F<br>KBP4,FOXO3,FPGS,                                                                                                                                                                                                                                                                                                                                               | 78 |

|                                               |                      |                           |          |       |                                                                                                                                                                                                                                                                                                                                        |    |
|-----------------------------------------------|----------------------|---------------------------|----------|-------|----------------------------------------------------------------------------------------------------------------------------------------------------------------------------------------------------------------------------------------------------------------------------------------------------------------------------------------|----|
|                                               |                      |                           |          |       | GCLC,GSK3A,HRAS,HSPB1,ID2,ID4,IGFBP2,JAK2,JMJD1C,KDM6A,KHK,KITLG,KPNB1,LRIG1,MACROH2A1,MAP1LC3B,MAP2K3,MAP3K7,MCOLN1,NEK7,NFKBIA,NUP62,PDGFRB,PDPK1,PES1,PFDN2,PHKA2,PIK3CA,PPP1R1B,PPP1R9A,PPP2R1A,PRPF19,PRPS2,PSMA6,RB1CC1,RCAN1,RICTOR,RPA1,SHPRH,SLC2A2,SNRNP200,SNX10,SOD2,SPOP,STIP1,STX8,TBC1D16,TCP1,THRSP,UBE2L3,USP47,YPEL3 |    |
| Hematological System Development And Function | Hemostasis           | Hemostasis                | 7.02E-04 | 1.093 | ABCB1,ANXA7,CYP4F2,DGKZ,DMD,F11,F2R,F3,FADS2,FGA,FGGB,FGG,GNA12,GSK3A,HMG20B,ITPK1,AK2,JMJD1C,NPC1,DPK1,PIK3CA,PRKAR2A,PSEN2,SERPINE2,ST3GAL4                                                                                                                                                                                          | 25 |
| DNA Replication, Recombination, And Repair    | Cleavage             | Cleavage Of DNA Fragment  | 7.81E-04 | 1.091 | ENDOG,HRAS,TSN,UNG                                                                                                                                                                                                                                                                                                                     | 4  |
| Neurological Disease                          | Cognitive Impairment | Cognitive Impairment      | 4.57E-04 | 1     | ACSL4,AHSA1,ARSG,ATP1A1,CA3,CAMKK2,CD47,CUL4B,CXADR,DDC,DMD,DPP4,DSP,FBXO31,FGFR2,FMO5,FOXO3,GCNT2,GSK3A,GSS,HMGCR,KDM6A,L2HGDH,MBNL2,MYO6,NCOA1,NR3C2,NUS1,OTUD6B,PEX6,PGAP1,PPP1R1B,PPP2R1A,PSEN2,RCAN1,SCAPER,SLC1A4,SLC35A3,SYNE1,SYT1,TBC1D20,TBC1D24,TUBB,UBR1,WDR26,WDR81                                                       | 46 |
| Cellular Assembly And Organization            | Organization         | Organization Of Organelle | 1.10E-03 | 1     | AFG3L2,AKAP9,ALAS1,ARHGAP21,ARHGAP6,CD2AP,CDH1,CDH2,CENPV,CHCHD3,CNP,CORO1B,CXADR,DSP,DVL1,ESRRA,FLCN,GOLGB1,HOOK1,ITPA,LMNA,LPIN1,MYO1B,PDE2A,PES1,PEX6,PPP1R9A,RPA1,RUFY3,SDC4,SERPINH1,SIRT5,SLK,SNX10,SOD2,SPA                                                                                                                     | 42 |

|                                                  |                                                 |                                                 |          |    |                                                                                                                                                                                                                                                                                                                                                                                                                                                                                                                                                                                                                                                                                                                                                                                                                                                                                                                                                                                                                                                                                                                                                                                                                                                                                         |     |
|--------------------------------------------------|-------------------------------------------------|-------------------------------------------------|----------|----|-----------------------------------------------------------------------------------------------------------------------------------------------------------------------------------------------------------------------------------------------------------------------------------------------------------------------------------------------------------------------------------------------------------------------------------------------------------------------------------------------------------------------------------------------------------------------------------------------------------------------------------------------------------------------------------------------------------------------------------------------------------------------------------------------------------------------------------------------------------------------------------------------------------------------------------------------------------------------------------------------------------------------------------------------------------------------------------------------------------------------------------------------------------------------------------------------------------------------------------------------------------------------------------------|-----|
| Cancer,Organismal<br>Injury And<br>Abnormalities | Malignant<br>Neoplasm Of<br>Retroperitoneu<br>m | Malignant<br>Neoplasm Of<br>Retroperitoneu<br>m | 1.59E-05 | -1 | RC,SPTBN1,SYNE1,<br>TBC1D20,TPR,TUBB,<br>WDR81<br>AASDH,ABCB1,ABC<br>B4,ABCG2,ABTB2,A<br>CAT2,ACLY,ACOX2,<br>ACSM5,ADH4,AHNA<br>K,AKAP11,AKAP9,AL<br>AS1,ALG13,ANKRD1<br>2,ANP32A,ARHGAP2<br>1,ATXN2L,BAP1,BRD<br>8,C9orf152,CAMKK2,<br>CAPN2,CBLB,CCDC<br>66,CCT3,CD9,CDC14<br>B,CDH1,CDH2,CHD6<br>,COL5A3,CUL4B,DC<br>TN1,DHX9,DIAPH2,D<br>ICER1,DIO1,DMD,DO<br>CK4,DPP4,DUSP19,<br>E2F5,EGR1,ERBB3,E<br>SRRA,EXOC6,EXTL2<br>,F11,F3,FGA,FGFR2,<br>FH,FLCN,FOXO3,FT<br>SJ3,G6PD,GABARAP<br>,GAS2L3,GCLC,GOL<br>GB1,GRHPR,GTF3C<br>2,HERC4,HMGCR,H<br>RAS,IL18,IRF6,JAK2,<br>KDM6A,KEAP1,KIAA<br>0100,KLF12,KLF9,KL<br>HL7,LMNA,LSM14B,L<br>SS,MAGI3,MAP2K3,<br>MIA2,MKNK2,MLLT1<br>0,MOCOS,MPDZ,MP<br>P1,MRPS27,MYO1B,<br>MYO5B,N4BP2L1,NA<br>GK,NCOA1,NFKBIA,<br>NGEF,NINJ1,NIPBL,<br>NME1,NPC1,NR5A2,<br>NRIP1,NUP62,PAN2,<br>PAQR9,PCDH1,PDE<br>2A,PDGFRB,PHKA2,<br>PIK3CA,PKHD1,PLX<br>NA2,PNKD,POR,PPP<br>1R1B,PPP1R9A,PPP<br>2R1A,PRPF6,PRPS1,<br>PSMD1,PSMD11,PS<br>MD2,PSMF1,PXMP4,<br>RAI14,RB1CC1,RBB<br>P5,RCL1,RPA1,SBF2<br>,SCAPER,SEC63,SE<br>NP6,SERPINE2,SER<br>PINH1,SETDB2,SHP<br>RH,SLC1A4,SLC20A<br>2,SLC2A5,SLC2A9,S<br>LC39A8,SLC9A3R1,S<br>MAD7,SNRNP200,S<br>OD2,SPARC,SPTBN<br>1,ST3GAL4,STARD7,<br>STXBP3,SYNE1,TEX<br>2,TMEM126A,TMEM5<br>1,TNRC6A,TOP1MT, | 170 |
|--------------------------------------------------|-------------------------------------------------|-------------------------------------------------|----------|----|-----------------------------------------------------------------------------------------------------------------------------------------------------------------------------------------------------------------------------------------------------------------------------------------------------------------------------------------------------------------------------------------------------------------------------------------------------------------------------------------------------------------------------------------------------------------------------------------------------------------------------------------------------------------------------------------------------------------------------------------------------------------------------------------------------------------------------------------------------------------------------------------------------------------------------------------------------------------------------------------------------------------------------------------------------------------------------------------------------------------------------------------------------------------------------------------------------------------------------------------------------------------------------------------|-----|



|                                                                           |                     |                     |          |    |                                                                                                                                                                                                                                                                                                                                                                                                                                                                                                                                                                                    |     |
|---------------------------------------------------------------------------|---------------------|---------------------|----------|----|------------------------------------------------------------------------------------------------------------------------------------------------------------------------------------------------------------------------------------------------------------------------------------------------------------------------------------------------------------------------------------------------------------------------------------------------------------------------------------------------------------------------------------------------------------------------------------|-----|
| Cancer, Organismal Injury And Abnormalities, Renal And Urological Disease | Neoplasia           | Renal Tumor         | 2.41E-05 | -1 | TRIB3, TUBB, TUBB6, TUBGCP2, TXNL1, UBE2F, UGP2, UROD, UTP14A, UTRN, VPS13A, WNT5B, ZFAND2B, ZNF654                                                                                                                                                                                                                                                                                                                                                                                                                                                                                | 80  |
|                                                                           |                     |                     |          |    | ABCB1, ACOX2, AHNAK, AKAP9, ALAS1, ARHGAP21, ATXN2L, BAP1, CCT3, CD9, CDC14B, CDH1, DICER1, DIO1, DUSP19, ERBB3, EXTL2, FGFR2, FH, FLCN, FOXO3, FTSJ3, G6PD, GABARAP, GRHPR, GTF3C2, HMGCR, HRAS, ID2, IL18, IRS1, KDM6A, KEAP1, KLHL7, LMNA, MAP2K3, MLLT10, MOCOS, MPP1, N4BP2L1, NCOA1, NFKBIA, NGEF, NIPBL, NME1, NRIP1, NUP62, PCDH1, PDE2A, PDGFRB, PIK3CA, PKHD1, PNKD, POR, PPP1R1B, PPP2R1A, PSMD1, PSMD2, RAI14, RCL1, SENP6, SLC1A4, SLC20A2, SLC2A9, SLC39A8, SLC9A3R1, SMAD7, SNRNP200, SOD2, SPTBN1, STXBP3, SYNE1, TMEM51, TUBB, TUBB6, UBE2F, UTP14A, UTRN, VPS13A |     |
| Cancer, Organismal Injury And Abnormalities, Renal And Urological Disease | Urinary Tract Tumor | Urinary Tract Tumor | 3.53E-05 | -1 | ABCB1, ACOX2, AFG3L2, AHNAK, AKAP11, AKAP9, ALAS1, ANKRD12, ARHGAP21, ATP1B1, ATXN2L, BAP1, BRD8, CARS1, CCT3, CD9, CDC14B, CDH1, CHD6, CLK2, CROT, DDC, DHX9, DIAPH2, DICER1, DIO1, DIPK2A, DSP, DUSP19, ERBB3, ESSRA, EXTL2, FGA, FGFR2, FGFR1, FH, FLCN, FOXO3, FTSJ3, G6PD, GABARAP, GOLGB1, GRHPR, GTF3C2, HMGCR, HRAS, HSPB1, ID2, IL18, IRS1, KAT2B, KDM6A, KEAP1, KLHDC2, KLHL7, KYN, LMNA, LPIN1, LSM14B, MACROH2A1, MAP2K3, MLLT10, MOCOS, MON2, MPP1, N4BP2L1, NAGK, NCOA1, N                                                                                           | 123 |
|                                                                           |                     |                     |          |    |                                                                                                                                                                                                                                                                                                                                                                                                                                                                                                                                                                                    |     |

|                                                                                             |                 |                                              |          |        |                                                                                                                                                                                                                                                                                                                                                                                                                                                |    |
|---------------------------------------------------------------------------------------------|-----------------|----------------------------------------------|----------|--------|------------------------------------------------------------------------------------------------------------------------------------------------------------------------------------------------------------------------------------------------------------------------------------------------------------------------------------------------------------------------------------------------------------------------------------------------|----|
|                                                                                             |                 |                                              |          |        | FKBIA,NGEF,NINJ1,<br>NIPBL,NME1,NRIP1,<br>NUP62,OAZ1,OSBPL<br>1A,PCDH1,PDE2A,P<br>DGFRB,PDRG1,PIK3<br>CA,PKHD1,PLXNA2,<br>PNKD,POR,PPP1R1<br>B,PPP2R1A,PSMD1,<br>PSMD2,RAI14,RB1C<br>C1,RCL1,RICTOR,R<br>OCK1,SBF2,SCYL1,S<br>EC63,SENP6,SHPRH<br>,SLC1A4,SLC20A2,S<br>LC2A9,SLC39A8,SLC<br>9A3R1,SMAD7,SNRN<br>P200,SOD2,SPARC,<br>SPOP,SPTBN1,STXB<br>P3,SYNE1,TBC1D16,<br>TMEM51,TUBB,TUB<br>B6,UBE2F,UGP2,UT<br>P14A,UTRN,VPS13A,<br>WIPI2 |    |
| Reproductive<br>System<br>Development And<br>Function                                       | Decidualization | Decidualization                              | 5,91E-05 | -1     | CDH1,CITED2,EGR1,<br>FGFR2,FKBP4,LGR5,<br>NCOA1,NR5A2                                                                                                                                                                                                                                                                                                                                                                                          | 8  |
| Free Radical<br>Scavenging,Molecul<br>ar Transport                                          | Quantity        | Quantity Of<br>Reactive<br>Oxygen<br>Species | 3,36E-04 | -1,001 | BID,CA3,CITED2,DN<br>AJB1,DPP4,FOXO3,<br>G6PD,HRAS,IL18,JA<br>K2,KEAP1,NFKBIA,N<br>R1H4,OGA,PRDX6,P<br>SEN2,SOD2,TXN2                                                                                                                                                                                                                                                                                                                          | 18 |
| Cellular Movement                                                                           | Migration       | Migration Of<br>Tumor Cell<br>Lines          | 3.26E-04 | -1.002 | ACSL4,AHNAK,AKAP<br>11,ARHGAP21,CAMK<br>K2,CAPN2,CBLB,CD<br>47,CD9,CDH1,CDH2,<br>CMTM8,CTDSP1,CT<br>SH,DPP4,DSP,E2F5,<br>EGR1,EIF4EBP1,EN<br>PP1,ERBB3,ESRRA,<br>F2R,F3,FGA,FGFR2,<br>FH,FOXO3,GNA12,H<br>MGCR,HRAS,ID2,IGF<br>BP2,IL18,ING4,IRS1,<br>JAK2,KEAP1,KITLG,L<br>MNA,NET1,NFKBIA,<br>NINJ1,NME1,NR1H4,<br>NR5A2,PDLIM1,PIK3<br>CA,PLD1,PLXNA2,PP<br>IF,PPP1R1B,RICTOR<br>,SDC4,SLC9A3R1,S<br>OD2,SPARC,STK24,<br>WDR26              | 59 |
| Lipid<br>Metabolism,Small<br>Molecule<br>Biochemistry,Vitami<br>n And Mineral<br>Metabolism | Metabolism      | Metabolism Of<br>Sterol                      | 4.81E-09 | -1.01  | ABCG5,ABCG8,ACA<br>T2,ACLY,AKR1D1,CE<br>S1,CYP39A1,CYP7A<br>1,ELOVL6,FECH,G6P<br>D,HMGCR,HSD17B2,<br>HSD3B7,KPNB1,LSS,<br>NPC1,NR1H4,POR,R<br>AN,SOAT2                                                                                                                                                                                                                                                                                         | 21 |
| Cell Cycle,Cellular                                                                         | Senescence      | Senescence Of                                | 3.67E-04 | -1.049 | AHCY,CDC14B,DICE                                                                                                                                                                                                                                                                                                                                                                                                                               | 14 |

|                                                                                        |                        |                         |          |        |  |                                                                                                                                                                                                                                                                                                                                                                                                                                                                                                                   |     |
|----------------------------------------------------------------------------------------|------------------------|-------------------------|----------|--------|--|-------------------------------------------------------------------------------------------------------------------------------------------------------------------------------------------------------------------------------------------------------------------------------------------------------------------------------------------------------------------------------------------------------------------------------------------------------------------------------------------------------------------|-----|
| Development,Connective Tissue Development And Function                                 |                        | Fibroblast Cell Lines   |          |        |  | R1,DMTF1,EGR1,FGFR2,GDA,HRAS,MAP3K7,NUDT1,PDPK1,TNRC6A,UNG,YPEL3                                                                                                                                                                                                                                                                                                                                                                                                                                                  |     |
| Cell Cycle                                                                             | Cell Cycle Progression | Cell Cycle Progression  | 5.78E-06 | -1.051 |  | ABCG2,ACSM5,AHN AK,AKAP9,BAP1,CAPN2,CCT4,CDH1,CITED2,CYLD,DGKZ,DHX9,DICER1,DMTF1,DPP4,E2F5,EGR1,EIF4EBP1,ERBB3,FGFR2,FGFRL1,FO XK1,FOXO3,GNA12,HECA, HMG20B,HRAS,HSPB1,ID2,IGFBP2,ING4,IRF6,IRS1,JAK2,KAT2B,KITLG,KPNB1,LGALS4,LMNA,LRIG1,MAGED1,MAP3K7,NEK7,NET1,NFKBIA,NME1,NUP62,NUP88,PDGFRB,PDPK1,PER1,PER3,PES1,PIK3CA,PPM1A,PPP1R12A,PPP2R1A,PRKAR2A,PSEN2,RAN,RASSF3,RHOD,RNF167,RPA1,SENP6,SETDB2,SLC20A1,SLC9A3R1,SMAD7,SPARC,TBRG4,TCP1,TIFA,TPR,TUBB                                                  | 75  |
| Cancer,Hematological Disease,Immunological Disease,Organismal Injury And Abnormalities | Neoplasia              | Neoplasia Of Leukocytes | 6.23E-05 | -1.053 |  | ABCB1,ABCG2,AHN AK,AKAP11,ANXA7,ASAP2,ATP1B1,BAP1,BID,CBLB,CCT3,CCT7,CD47,CDH1,CDO1,CEBPD,CHD6,CITED2,CNP,COL27A1,CTSH,CUL4B,DDC,DEK,DGKZ,DICER1,DIO1,DMD,DMTF1,DPP4,DSP,EGR1,EIF4EBP1,ENPP1,ERBB3,EXTL2,F2R,F3,FAM102A,FBXO31,FBXO9,FGFR2,FOXO3,FPGS,GNA12,GPD2,GRHPR,HECA,HMGCR,HRAS,HSPB1,ICK,ID2,IL18, JAK2,JMJD1C,KDM6A,KIAA0100,KITLG,KPNB1,LPIN1,LRIG1,LTBR,MAGED1,MAP2K3,MEF2A,MIA2,MKNK2,MLLT10,MPDZ,MRPL20,MYO5B,NFKBIA,NINJ1,NIPBL,NME1,PALMD,PDE9A,PDGFC,PDGFRB,PDPK1,PER1,PIK3CA,PLXNA2,PNKD,PNRC1,P | 113 |

|                                                                              |           |                           |          |        |                                                                                                                                                                                                                                                                                                                                                                                                                                                                                                                                                                                                                                                                                                                                                                                                                                                                                                                                                                                                                                                                                                |     |
|------------------------------------------------------------------------------|-----------|---------------------------|----------|--------|------------------------------------------------------------------------------------------------------------------------------------------------------------------------------------------------------------------------------------------------------------------------------------------------------------------------------------------------------------------------------------------------------------------------------------------------------------------------------------------------------------------------------------------------------------------------------------------------------------------------------------------------------------------------------------------------------------------------------------------------------------------------------------------------------------------------------------------------------------------------------------------------------------------------------------------------------------------------------------------------------------------------------------------------------------------------------------------------|-----|
| Cancer,Gastrointestinal<br>Disease,Organismal<br>Injury And<br>Abnormalities | Neoplasia | Gastrointestinal<br>Tumor | 7.05E-14 | -1.054 | OLE4,POR,PRPF19,<br>PRPS1,PSMD1,PSM<br>D2,RAN,RICTOR,RP<br>A1,SARS1,SERPINH<br>1,SHMT1,SLC25A32,<br>SMAD7,SOD2,SPAR<br>C,SPTBN1,STIP1,ST<br>K24,SYT1,TPR,TUBB<br>6,TUT4,UBE2F,UBR1<br>,UNG,VPS13A                                                                                                                                                                                                                                                                                                                                                                                                                                                                                                                                                                                                                                                                                                                                                                                                                                                                                              | 471 |
|                                                                              |           |                           |          |        | AASDH,ABCB1,ABC<br>B4,ABCG2,ABCG5,A<br>BTB2,ACAD8,ACLY,<br>ACOX2,ACSL4,ACSL<br>5,ACSS2,ACTR6,AF<br>G3L2,AGPAT2,AHCY<br>,AHNAK,AHSA1,AKA<br>P11,AKAP9,ALAS1,A<br>LDH1L1,ALG13,ANK<br>RD12,ANXA7,ARF3,A<br>RHGAP18,ARHGAP2<br>1,ARHGAP6,ARIH2,A<br>RL6IP4,ARSG,ASAP<br>2,ASB13,ATG3,ATG4<br>D,ATP1A1,ATP1B1,A<br>TP6V1D,ATXN2L,BA<br>AT,BAP1,BDH1,BHM<br>T,BHMT2,BID,BLMH,<br>BRD8,C11orf54,C9orf<br>152,C9orf16,CAMKK2<br>,CAPN2,CARS1,CBL<br>B,CCBE1,CCDC66,C<br>CT4,CCT5,CCT7,CD<br>2AP,CD9,CD99L2,CD<br>H1,CDH2,CDO1,CEB<br>PD,CENPV,CES1,CG<br>N,CHCHD3,CHCHD4,<br>CHD6,CHPT1,CHRA<br>C1,CIB3,CITED2,CLD<br>ND1,CLK2,CLMN,CL<br>OCK,CMTM6,CNOT4<br>,CNP,COL27A1,COL<br>5A3,CORO1B,CPEB4<br>,CPT1A,CRIP2,CROT<br>,CS,CTDSP1,CTPS2,<br>CTSH,CUL4B,CXAD<br>R,CYLD,CYP2U1,CY<br>P4F2,CYP7A1,CYTH<br>1,DAZAP1,DCTN1,D<br>DC,DDX60,DEK,DGK<br>Z,DHX9,DIAPH2,DIC<br>ER1,DIO1,DIPK2A,DI<br>XDC1,DMD,DMTF1,D<br>NAJC5,DOCK4,DPP4<br>,DPP9,DSP,DSTN,D<br>USP19,DVL1,E2F5,E<br>CHDC1,EEPD1,EGR<br>1,EIF4EBP1,ELF1,ER<br>BB3,ESRRA,EXOC6,<br>EXOSC2,F11,F2R,F3<br>,FADS2,FAM102A,FA<br>M160B1,FAM172A,F |     |

ECH,FGA,FGB,FGFR  
2,FGFRL1,FGG,FKB  
P4,FLCN,FMO1,FMO  
5,FOXK1,FOXO3,FP  
GS,FTSJ3,G6PD,GA  
S2L3,GCAT,GCLC,G  
CNT2,GDA,GNA12,G  
NG12,GOLGB1,GPD  
2,GPN1,GRHPR,GSD  
MD,GSK3A,GSS,GT  
F2F1,GTFC3C2,HECA,H  
ECTD3,HERC4,HMG  
20B,HMGCR,HNRNP  
C,HNRNPD,HOMER2  
,HOOK1,HRAS,HSD1  
7B2,HSD3B7,HSPB1,  
ICK,ID2,ID4,IGFBP2,I  
L18,ING4,IRF6,IRS1,I  
TPK1,JAK2,JMJD1C,  
KAT2B,KCMF1,KDM6  
A,KEAP1,KIAA0100,K  
ITLG,KLF12,KLF9,KL  
HDC2,KLHL21,KLHL  
7,KPNB1,KTN1,KYN  
U,LARS2,LGALS4,LG  
R5,LIN7A,LIN7C,LMN  
A,LRIG1,LRP12,LRR  
C28,LRRC3,LSM14B,  
LSS,LTBR,MACROH  
2A1,MAGED1,MAGI3  
,MAP2K3,MAP3K7,M  
BNL2,MCOLN1,MEF2  
A,MIA2,MKNK2,MLLT  
10,MLX,MOCOS,MO  
N2,MPDZ,MPRIIP,MR  
NIP,MRPL12,MRPL2  
0,MRPL24,MRPS25,  
MRPS27,MRPS9,MT  
1F,MYO1B,MYO5B,M  
YO6,N4BP2,NCALD,  
NCOA1,NDUFA12,N  
DUFA9,NEK7,NET1,  
NFKBIA,NGEF,NHLR  
C2,NIPBL,NME1,NO  
SIP,NPC1,NR1H4,NR  
2F6,NR3C2,NR5A2,N  
RIP1,NT5C,NUDT1,N  
UDT19,NUDT7,NUP6  
2,NUP88,OAZ1,OSB  
PL1A,OXR1,PALMD,  
PAN2,PAN3,PAQR9,  
PCDH1,PCGF5,PDE2  
A,PDE9A,PDGFC,PD  
GFRB,PDLIM1,PDP2,  
PDPK1,PDRG1,PER1  
,PER3,PES1,PEX6,P  
FDN2,PGAP1,PHF20  
L1,PHKA2,PIK3AP1,  
PIK3CA,PKHD1,PLD  
1,PLXNA2,PMPCA,P  
NKD,PNRC1,POR,PP  
M1A,PPOX,PPP1R12

A,PPP1R14B,PPP1R1B,PPP1R3B,PPP1R9A,PPP2R1A,PRDX6,PRPF39,PRPF6,PRPS1,PSMD1,PSMD11,PSMD8,PSPC1,PSPH,PTBP1,QDPR,RAB11FIP2,RABGAP1L,RAI14,RALGPS2,RAN,RASA3,RASSF3,RB1CC1,RBBP5,RBBP7,REPIN1,RGS2,RHBD1,RICTOR,ROCK1,RPA1,RUFY3,SAA4,SAR1B,SARS1,SBF2,SCAPER,SCARB2,SCYL1,SDC4,SEC63,SECISBP2L,SENP6,SERPINA6,SERPINE2,SERPINH1,SESN3,SETDB2,SFRP5,SGK2,SGTB,SH3D19,SHMT1,SHPRH,SIRT5,SLC1A4,SLC20A1,SLC20A2,SLC27A2,SLC2A2,SLC2A5,SLC2A9,SLC30A10,SLC35B3,SLC38A2,SLC39A10,SLC39A8,SLC6A12,SLK,SMAD7,SMAP1,SNAPC2,SNRNP200,SNBTB1,SNX10,SNX9,SOD2,SPARC,SPG21,SPON2,SPOP,SPTBN1,SPTBN2,ST3GAL4,STIP1,STK40,STOM,STT3B,STX8,STXBP3,SULF2,SYAP1,SYNE1,SYT1,TBC1D16,TBC1D20,TBC1D24,TBRG4,TCP1,TEP1,TEX2,THAP4,THRSP,TIGD2,TIMM44,TBK1,TLE1,TMBIM1,TMEM126A,TMEM219,TMEM41A,TMEM41B,TMEM62,TMEM97,TNFAIP8L1,TNRC6A,TOP1MT,TPI1,TPR,TPRKB,TRIB3,TRMT1,TPSPAN33,TTC1,TTC19,TUBB,TUBB6,TUBGCP2,TXNL1,UBAC1,UBE2L3,UBR1,UBTF,UBXN1,UBXN6,UCK1,UGP2,ULK1,UNG,UPP2,UROC1,UROD,USP47,UTP14A,UTRN,UXS1,VPS13A,WDR18,WDR26,WDR81,WIP12,WNT5B,YWHAH,ZCCHC24,ZNF23,ZN

|                                                                     |                          |                                 |          |        |                                                                                                                                                                                                                                                                                                                                                                                                                                                                                                                                                                                                                                                                                                                                                                                           |     |
|---------------------------------------------------------------------|--------------------------|---------------------------------|----------|--------|-------------------------------------------------------------------------------------------------------------------------------------------------------------------------------------------------------------------------------------------------------------------------------------------------------------------------------------------------------------------------------------------------------------------------------------------------------------------------------------------------------------------------------------------------------------------------------------------------------------------------------------------------------------------------------------------------------------------------------------------------------------------------------------------|-----|
| Cell-To-Cell Signaling And Interaction                              | Interaction              | Interaction Of Tumor Cell Lines | 2,01E-04 | -1,057 | F32,ZNF326<br>ARHGAP21,CD47,CD9,CDH1,CDH2,CXADR,CYTH1,DPP4,DSP,EGR1,ERBB3,F2R,F3,FGA,FGFR2,HRAS,IL18,IRS1,JAK2,KITLG,LGALS4,LTBR,MYO6,NET1,NFKBIA,NME1,NR1H4,PLD1,RCAN1,RICTOR,TCIM,UTRN                                                                                                                                                                                                                                                                                                                                                                                                                                                                                                                                                                                                  | 32  |
| Cellular Compromise                                                 | Nucleation               | Nucleation Of Cells             | 1.02E-03 | -1.067 | CD2AP,GAS2L3,HRAS,KPNB1,LMNA,NEK7,PPP1R12A,RHOD                                                                                                                                                                                                                                                                                                                                                                                                                                                                                                                                                                                                                                                                                                                                           | 8   |
| Cancer,Gastrointestinal Disease,Organismal Injury And Abnormalities | Large Intestine Neoplasm | Large Intestine Neoplasm        | 1.52E-14 | -1.091 | AASDH,ABCB1,ABCB4,ABCG2,ABCG5,ABTB2,ACAD8,ACLY,ACOX2,ACSL4,ACSL5,ACSS2,ACTR6,AFG3L2,AGPAT2,AHCY,AHNAK,AHSA1,AKAP11,AKAP9,ALAS1,ALDH1L1,ALG13,ANKRD12,ANXA7,ARF3,ARHGAP18,ARHGAP21,ARHGAP6,ARIH2,ARL6IP4,ARSG,ASAP2,ASB13,ATG3,ATG4D,ATP1A1,ATP1B1,ATP6V1D,ATXN2L,BAT,BAP1,BDH1,BHMT2,BID,BLMH,BRD8,C11orf54,C9orf152,C9orf16,CAMKK2,CAPN2,CARS1,CBLB,CBE1,CCDC66,CCT4,CCT5,CCT7,CD2AP,CD9,CD99L2,CDH1,CDH2,CDO1,CEBPD,CENPV,CES1,CGN,CHCHD3,CHCHD4,CHD6,CHPT1,CHRA1,CIB3,CITED2,CLDN1,CLK2,CLMN,CLOCK,CMTM6,CNOT4,CNP,COL27A1,COL5A3,CORO1B,CPEB4,CPT1A,CRIP2,CROT,CS,CTDSP1,CTPS2,CUL4B,CXADR,CYLD,CYP2U1,CYP4F2,CYP7A1,CYTH1,DAZAP1,DCTN1,DDC,DDX60,DEK,DGKZ,DHX9,DIPK2A,DICER1,DIO1,DIPK2A,DIXDC1,DMT1,DMTF1,DNAJC5,DOCK4,DPP4,DPP9,DSP,DSTN,DUSP19,DVL1,ECHDC1,EEPD1,EGR1,EIF4EBP1,EL | 457 |

F1,ERBB3,ESRRA,E  
XOC6,EXOSC2,F11,  
F2R,F3,FADS2,FAM1  
02A,FAM160B1,FAM  
172A,FECH,FGA,FG  
B,FGFR2,FGFRL1,F  
GG,FKBP4,FLCN,FM  
O1,FMO5,FOXK1,FP  
GS,FTSJ3,G6PD,GA  
S2L3,GCAT,GCLC,G  
CNT2,GDA,GNA12,G  
NG12,GOLGB1,GPD  
2,GPN1,GRHR,GSD  
MD,GSK3A,GSS,GTF  
2F1,GTF3C2,HECA,H  
ECTD3,HERC4,HMG  
20B,HMGCR,HNRNP  
C,HNRNPD,HOMER2  
,HOOK1,HRAS,HSD1  
7B2,HSD3B7,HSPB1,  
ICK,ID2,ID4,IGFBP2,I  
L18,ING4,IRF6,IRS1,I  
TPK1,JAK2,JMJD1C,  
KAT2B,KCMF1,KDM6  
A,KEAP1,KIAA0100,K  
ITLG,KLF12,KLF9,KL  
HDC2,KLHL21,KLHL  
7,KPNB1,KTN1,KYN  
U,LARS2,LGALS4,LG  
R5,LIN7A,LMNA,LRI  
G1,LRP12,LRR28,L  
RRC3,LSM14B,LSS,L  
TBR,MACROH2A1,M  
AGED1,MAGI3,MAP2  
K3,MAP3K7,MBNL2,  
MEF2A,MIA2,MKNK2  
,MLLT10,MLX,MOCO  
S,MON2,MPDZ,MPRI  
P,MRNIP,MRPL12,M  
RPL20,MRPL24,MRP  
S25,MRPS27,MRPS9  
,MT1F,MYO1B,MYO5  
B,MYO6,N4BP2,NCA  
LD,NCOA1,NDUFA12  
,NDUFA9,NEK7,NET  
1,NFKBIA,NGEF,NHL  
RC2,NIPBL,NME1,N  
OSIP,NPC1,NR1H4,N  
R2F6,NR3C2,NR5A2,  
NRIP1,NT5C,NUDT1,  
NUDT19,NUDT7,NUP  
62,NUP88,OAZ1,OSB  
PL1A,OXR1,PALMD,  
PAN2,PAN3,PAQR9,  
PCDH1,PCGF5,PDE2  
A,PDE9A,PDGFC,PD  
GFRB,PDLIM1,PDP2,  
PDPK1,PDRG1,PER1  
,PER3,PEX6,PFDN2,  
PGAP1,PHF20L1,PH  
KA2,PIK3AP1,PIK3C  
A,PKHD1,PLD1,PLX



NA2,PMPCA,PNKD,P  
NRC1,POR,PPM1A,P  
POX,PPP1R12A,PPP  
1R14B,PPP1R1B,PP  
P1R3B,PPP1R9A,PP  
P2R1A,PRDX6,PRPF  
39,PRPF6,PRPS1,PS  
MD1,PSMD11,PSMD  
8,PSPC1,PSPH,PTB  
P1,QDPR,RAB11FIP  
2,RABGAP1L,RAI14,  
RALGPS2,RAN,RAS  
A3,RASSF3,RB1CC1,  
RBBP5,RBBP7,REPI  
N1,RHBDD1,RICTOR  
,ROCK1,RPA1,RUFY  
3,SAA4,SAR1B,SAR  
S1,SBF2,SCAPER,S  
CYL1,SEC63,SECISB  
P2L,SENP6,SERPIN  
A6,SERPINE2,SERPI  
NH1,SESN3,SETDB2  
,SFRP5,SGK2,SGTB,  
SH3D19,SHMT1,SHP  
RH,SIRT5,SLC1A4,S  
LC20A1,SLC20A2,SL  
C27A2,SLC2A2,SLC2  
A5,SLC2A9,SLC30A1  
0,SLC35B3,SLC38A2  
,SLC39A10,SLC39A8  
,SLC6A12,SLK,SMAD  
7,SMAP1,SNAPC2,S  
NRNP200,SNX10,SN  
X9,SOAT2,SOD2,SP  
ARC,SPG21,SPOP,S  
PTBN1,SPTBN2,ST3  
GAL4,STIP1,STK40,S  
TOM,STT3B,STX8,S  
TXBP3,SULF2,SYAP  
1,SYNE1,SYT1,TBC1  
D16,TBC1D20,TBC1  
D24,TBRG4,TCP1,TE  
P1,TEX2,THAP4,THR  
SP,TIGD2,TIMM44,T  
K1,TLE1,TMBIM1,TM  
EM126A,TMEM219,T  
MEM41A,TMEM41B,  
TMEM62,TMEM97,T  
NFAIP8L1,TNRC6A,T  
OP1MT,TPI1,TPR,TP  
RKB,TRIB3,TRMT1,T  
SPAN33,TTC1,TTC1  
9,TUBB,TUBB6,TUB  
GCP2,TXNL1,UBAC1  
,UBE2L3,UBR1,UBTF  
,UBXN1,UBXN6,UCK  
1,UGP2,ULK1,UNG,U  
PP2,UROC1,UROD,U  
SP47,UTRN,UXS1,V  
PS13A,WDR18,WDR  
26,WDR81,WIP1,WN  
T5B,YWHAH,ZCCHC

|                                                                     |                      |                  |          |        |                                                                                                                                                                                                                                                                                                                                                                                                                                                                                                                                                                                                                                                                                                                                                                                                                                                                                                                                                                                                                                                                  |     |
|---------------------------------------------------------------------|----------------------|------------------|----------|--------|------------------------------------------------------------------------------------------------------------------------------------------------------------------------------------------------------------------------------------------------------------------------------------------------------------------------------------------------------------------------------------------------------------------------------------------------------------------------------------------------------------------------------------------------------------------------------------------------------------------------------------------------------------------------------------------------------------------------------------------------------------------------------------------------------------------------------------------------------------------------------------------------------------------------------------------------------------------------------------------------------------------------------------------------------------------|-----|
| Cancer,Gastrointestinal Disease,Organismal Injury And Abnormalities | Colorectal Neoplasia | Colorectal Tumor | 3.84E-07 | -1.091 | 24,ZNF23,ZNF326<br>AASDH,ABCB1,ABCG2,ABCG5,ACLY,ACOX2,ACSL5,ACSS2,ACTR6,AFG3L2,AGPAT2,AHCY,AKAP9,ALAS1,ALDH1L1,ALG13,ANXA7,ARHGAP21,ARL6IP4,ASAP2,ASB13,ATG3,ATG4D,ATXN2L,BAAT,BAP1,BID,C11orf54,C9orf152,C9orf16,CARS1,CCDC66,CCT4,CCT5,CCT7,CD2AP,CD9,CD99L2,CDH1,CDH2,CDO1,CEBPD,CES1,CGN,CHCHD3,CHD6,CHPT1,CHRA1,CLDND1,CLK2,CLMN,CLOCK,CMTM6,CNOT4,CNP,COL27A1,COL5A3,CPEB4,CPT1A,CS,CTDSP1,CTPS2,CUL4B,CYLD,CYP4F2,DCTN1,DDX60,DGKZ,DHX9,DICER1,DMD,DMTF1,DOCK4,DSTN,EGFR1,EIF4EBP1,ELF1,ERBB3,ESRRA,F2R,F3,FAM160B1,FECH,FGA,FGB,FGFR2,FGG,FLCN,FMO1,FMO5,PGS,G6PD,GAS2L3,GNA12,GNG12,GSS,GTTF2F1,HECA,HECTD3,HMGCR,HNRNPC,HRAS,HSD17B2,HSPB1,ICK,ID2,IGFBP2,IL18,ING4,IRF6,IRS1,JAK2,JMJD1C,KAT2B,KDM6A,KEAP1,KIAA0100,KITLG,KLF12,KLHL7,KPNB1,KTN1,LGALS4,LGR5,LIN7A,LRIG1,LRP12,LRRC3,LTBR,MACROH2A1,MAGED1,MAP3K7,MEF2A,MIA2,MKNK2,MLLT10,MLX,MON2,MPDZ,MPRIIP,MRNIP,MRPS9,MT1F,MYO5B,MYO6,NCOA1,NEK7,NET1,NGEF,NHLRC2,NIPBL,NME1,NOSIP,NR1H4,NR3C2,NR5A2,NT5C,NUDT19,NUDT7,NUP62,OAZ1,OSBPL1A,PAQR9,PCDH1,PCGF5,PDE9A,PDGFRB,PDLIM1,PD2,PDPK1,PDRG1, | 271 |
|---------------------------------------------------------------------|----------------------|------------------|----------|--------|------------------------------------------------------------------------------------------------------------------------------------------------------------------------------------------------------------------------------------------------------------------------------------------------------------------------------------------------------------------------------------------------------------------------------------------------------------------------------------------------------------------------------------------------------------------------------------------------------------------------------------------------------------------------------------------------------------------------------------------------------------------------------------------------------------------------------------------------------------------------------------------------------------------------------------------------------------------------------------------------------------------------------------------------------------------|-----|

Lipid  
Metabolism,Molecular  
Transport,Small  
Molecule  
Biochemistry

Concentration

Concentration  
Of Lipid

4.91E-07

-1.095

PER1,PFDN2,PGAP1  
,PHF20L1,PHKA2,PI  
K3AP1,PIK3CA,PKH  
D1,PLD1,PLXNA2,PN  
KD,PNRC1,POR,PPP  
1R14B,PPP1R1B,PP  
P1R9A,PPP2R1A,PR  
DX6,PRPF39,PRPF6,  
PSMD8,PTBP1,QDP  
R,RABGAP1L,RASSF  
3,RB1CC1,RBBP5,RI  
CTOR,ROCK1,RPA1,  
RUFY3,SAA4,SBF2,S  
CAPER,SCYL1,SEC6  
3,SECISBP2L,SENP6  
,SERPINE2,SESN3,S  
GK2,SHPRH,SLC1A4  
,SLC20A1,SLC20A2,  
SLC27A2,SLC2A2,SL  
C30A10,SLC35B3,SL  
C38A2,SLC39A10,SL  
C39A8,SLC6A12,SM  
AD7,SMAP1,SNRNP  
200,SNX9,SOAT2,SO  
D2,SPARC,SPOP,SP  
TBN1,SPTBN2,STIP1  
,STX8,SULF2,SYAP1  
,SYNE1,SYT1,TBC1D  
16,TBC1D24,TBRG4,  
TCP1,TEP1,TIMM44,  
TK1,TMEM126A,TME  
M41B,TMEM97,TNR  
C6A,TOP1MT,TPI1,T  
PR,TRIB3,TTC1,TUB  
B,UBAC1,UBTF,UGP  
2,ULK1,UNG,UROC1,  
UTRN,VPS13A,WDR  
18,WDR26,WDR81,W  
NT5B,ZCCHC24,ZNF  
23

65  
ABCB1,ABCB4,ABC  
G2,ABCG5,ABCG8,A  
CAT2,ACLY,ACSL4,A  
GPAT2,ATP1A1,BHM  
T,BID,CES1,CLOCK,  
CPT1A,CYP4F2,CYP  
7A1,DGKZ,DICER1,D  
IO1,EGR1,F2R,FADS  
2,FGFR2,FKBP4,FM  
O5,FOXO3,G6PD,GP  
D2,GSK3A,HMGCR,  
HRAS,HSD3B7,IL18,I  
RS1,JAK2,KITLG,LG  
R5,LMNA,LPIN1,MAC  
ROH2A1,NCOA1,NP  
C1,NR1H4,NR5A2,N  
US1,OGA,PDGFRB,P  
FKFB1,PIK3CA,PLD1  
,POR,PRDX6,PRPF1  
9,PSEN2,ROCK1,SE  
RPINA6,SIRT5,SLC2  
A2,SLC9A3R1,SOAT

|                                               |            |                       |          |        |                                                                                                                                                                                                                                                                                                                                                                                                                                                                                                                                                                                                                                                                                                                                                                                  |     |
|-----------------------------------------------|------------|-----------------------|----------|--------|----------------------------------------------------------------------------------------------------------------------------------------------------------------------------------------------------------------------------------------------------------------------------------------------------------------------------------------------------------------------------------------------------------------------------------------------------------------------------------------------------------------------------------------------------------------------------------------------------------------------------------------------------------------------------------------------------------------------------------------------------------------------------------|-----|
| Lipid Metabolism, Small Molecule Biochemistry | Metabolism | Fatty Acid Metabolism | 3.36E-08 | -1.107 | 2, SOD2, STARD4, TH RSP, UBR1 ABCB1, ABCB4, ABCG2, ABCG5, ABCG8, ACLY, ACSL3, ACSL4, ACSL5, ACSM1, ACSS2, BAAT, CD9, CES1, CP T1A, CROT, CS, CYP4 F2, CYP7A1, EGR1, EIF4EBP1, ELOVL6, F2R, FADS2, FH, FOXO3, HLF, HRAS, IL18, JAK2, KITLG, LPIN1, LSS, MAP2K3, NFKB1A, NPC1, NR1H4, NUDT19, NUDT7, OSBPL1A, POR, PRDX6, SCARB2, SERPINA6, SLC10A1, SLC27A2, SLC38A2, SLC9A3R1, SNTB1, SOAT2, STARD4, THRSP, TRIB3                                                                                                                                                                                                                                                                                                                                                                | 53  |
| Cancer, Organismal Injury And Abnormalities   | Neoplasia  | Epithelial Neoplasm   | 1.54E-28 | -1.125 | AASDH, ABCB1, ABCB4, ABCG2, ABCG5, ABCG8, ABTB2, ACAD8, ACAT2, ACLY, ACOX2, ACSL3, ACSL4, ACSL5, ACSM1, ACSM5, ACSS2, ACTR6, ADH4, AFG3L2, AGPAT2, AH CY, AHNK, AHS1, AKAP11, AKAP9, AKR1D1, ALAS1, ALDH1L1, ALG13, AMDHD1, ANKRD12, ANP32A, ANXA7, ARF3, ARGLU1, ARHGAP18, ARHGAP21, ARHGAP6, ARIH2, ARL15, ARL4A, ARL6IP4, ARSG, ASAP2, ASB13, ATG3, ATG4D, ATP1A1, ATP1B1, ATP6V1D, ATXN2L, AUH, BAA T, BAP1, BDH1, BHMT, BHMT2, BID, BIK, BLMH, BRD8, BUD23, C11orf54, C9orf152, C9orf16, CA3, CAMKK2, CAPN2, CARS1, CBLB, CCB1, CCDC66, CCT3, CCT4, CCT5, CCT6A, CCT7, CD2AP, CD47, CD9, CD99L2, CDA, CDC14B, CDH1, CDH2, CDO1, CEBPD, CENPV, CES1, CGN, CHCHD3, CHCHD4, CHD6, CHPT1, CHRA1, CIB3, CITED2, CLDN1, CLK2, CLMN, CLOCK, CMT6, CMT8, CNN3, CNOT4, CNOT6, CNP, C | 583 |

OL27A1, COL5A3, CO  
RO1B, CPEB4, CPT1A  
, CRIP2, CRLS1, CROT  
, CS, CSRN1P1, CTDSP  
1, CTPS2, CTSH, CUL4  
B, CXADR, CYB5B, CY  
LD, CYP2U1, CYP39A  
1, CYP4F2, CYP7A1, C  
YTH1, DAZAP1, DCTN  
1, DDC, DDX60, DEK, D  
GKZ, DHX9, DIAPH2, D  
ICER1, DIO1, DIPK2A,  
DIXDC1, DMD, DMTF1  
, DNAJB1, DNAJC5, D  
OCK4, DPP4, DPP9, D  
SP, DSTN, DTYMK, DU  
SP19, DVL1, E2F5, EC  
HDC1, EEPD1, EFHD2  
, EGR1, EIF1AX, EIF4E  
BP1, ELF1, ENDOG, E  
NPP1, ERBB3, ESRRA  
, EXOC6, EXOSC2, EX  
TL2, F11, F2R, F3, FAD  
S2, FAM102A, FAM11  
8B, FAM160B1, FAM1  
72A, FAM76B, FAM89  
A, FBXO31, FBXO9, FE  
CH, FGA, FGB, FGFR2  
, FGFR1, FGG, FH, FK  
BP4, FLCN, FMO1, FM  
O5, FOXK1, FOXO3, F  
PGS, FTSJ3, G6PD, G  
AS2L3, GCAT, GCLC,  
GCNT2, GDA, GNA12,  
GNG12, GOLGB1, GP  
D2, GPN1, GRHR, GS  
DMD, GSK3A, GSS, G  
STM2, GTF2A2, GTF2  
F1, GTF3C2, GYG1, H  
ECA, HECTD3, HERC  
4, HLF, HMG20B, HMG  
CR, HNRNPC, HNRNP  
D, HOMER2, HOOK1,  
HRAS, HSD17B2, HSD  
3B7, HSPB1, ICK, ID2, I  
D4, IGFBP2, IL18, ING  
4, IRF6, IRS1, ITPA, ITP  
K1, JAK2, JMJD1C, KA  
T2B, KCMF1, KDM6A,  
KEAP1, KHK, KIAA010  
0, KITLG, KLF12, KLF9,  
KLHDC2, KLHL21, KL  
HL7, KPNB1, KTN1, KY  
NU, L2HGDH, LARS2,  
LGALS4, LGR5, LIN7A  
, LIN7C, LITAF, LMNA,  
LPIN1, LRIG1, LRP12,  
LRRC28, LRRC3, LSM  
14B, LSS, LTBR, MAC  
ROH2A1, MAGED1, M  
AGI3, MAP1LC3B, MA  
P2K3, MAP3K7, MBNL

2,MCOLN1,MEF2A,M  
IA2,MKNK2,MLLT10,  
MLX,MMD,MOCOS,M  
ON2,MPDZ,MPP1,M  
PRIP,MRNIP,MRPL1  
2,MRPL20,MRPL24,  
MRPL44,MRPS22,M  
RPS25,MRPS27,MR  
PS9,MT1F,MYO1B,M  
YO5B,MYO6,N4BP2,  
N4BP2L1,NAGK,NCA  
LD,NCOA1,NDUFA12  
,NDUFA9,NDUFB9,N  
EK7,NET1,NFKBIA,N  
GEF,NHLRC2,NINJ1,  
NIPBL,NME1,NOSIP,  
NPC1,NR1H4,NR2F6  
,NR3C2,NR5A2,NRIP  
1,NT5C,NUDT1,NUD  
T19,NUDT7,NUP62,N  
UP88,NUS1,OAZ1,O  
SBPL1A,OTUD6B,OX  
R1,PALMD,PAN2,PA  
N3,PAQR9,PCDH1,P  
CGF5,PDCD2,PDE2A  
,PDE9A,PDGFC,PDG  
FRB,PDLIM1,PDP2,P  
DPK1,PDRG1,PER1,  
PER3,PES1,PEX26,P  
EX6,PFDN2,PFKFB1,  
PGAP1,PHF20L1,PH  
KA2,PIK3AP1,PIK3C  
A,PKHD1,PLD1,PLX  
NA2,PMPCA,PNKD,P  
NRC1,POR,PPIF,PP  
M1A,PPOX,PPP1R12  
A,PPP1R14B,PPP1R  
1B,PPP1R3B,PPP1R  
9A,PPP2R1A,PRDX6,  
PRPF19,PRPF39,PR  
PF6,PRPS1,PRPS2,P  
SEN2,PSMA6,PSMD  
1,PSMD11,PSMD2,P  
SMD8,PSME2,PSMG  
1,PSPC1,PSPH,PTB  
P1,PTBP2,PXMP4,Q  
DPR,RAB11FIP2,RA  
B1B,RABEPK,RABG  
AP1L,RAI14,RALGPS  
2,RAN,RASA3,RASS  
F3,RB1CC1,RBBP5,  
RBBP7,RBKS,RCAN  
1,RCL1,REPIN1,RGS  
2,RHBDD1,RHOD,RI  
CTOR,RNF14,RNF14  
4A,RNF167,ROCK1,  
RPA1,RPIA,RUFY3,S  
AA4,SAR1B,SARS1,  
SBF2,SCAPER,SCA  
RB2,SCYL1,SDC4,S  
DR42E1,SEC63,SECI  
SBP2L,SENP6,SERP

|                                                                                     |           |                 |          |        |                                                                                                                                                                                                                                                                                                                                                                                                                                                                                                                                                                                                                                                                                                                                                                                                                                                                                                                                                                                                                                                                                                                                                                                 |     |
|-------------------------------------------------------------------------------------|-----------|-----------------|----------|--------|---------------------------------------------------------------------------------------------------------------------------------------------------------------------------------------------------------------------------------------------------------------------------------------------------------------------------------------------------------------------------------------------------------------------------------------------------------------------------------------------------------------------------------------------------------------------------------------------------------------------------------------------------------------------------------------------------------------------------------------------------------------------------------------------------------------------------------------------------------------------------------------------------------------------------------------------------------------------------------------------------------------------------------------------------------------------------------------------------------------------------------------------------------------------------------|-----|
| Cancer,Organismal<br>Injury And<br>Abnormalities,Repro<br>ductive System<br>Disease | Neoplasia | Prostatic Tumor | 3.33E-06 | -1.131 | INA6,SERPINE2,SER<br>PINH1,SESN3,SETD<br>B2,SFRP5,SGK2,SG<br>TB,SH3D19,SHMT1,<br>SHPRH,SIRT5,SLC1<br>0A1,SLC16A5,SLC1A<br>4,SLC20A1,SLC20A2<br>,SLC25A32,SLC27A2<br>,SLC2A2,SLC2A5,SL<br>C2A9,SLC30A10,SLC<br>35A3,SLC35B1,SLC3<br>5B3,SLC38A2,SLC39<br>A10,SLC39A8,SLC6A<br>12,SLC9A3R1,SLK,S<br>MAD7,SMAP1,SNAP<br>C2,SNRNP200,SNTB<br>1,SNX10,SNX5,SNX9<br>,SOAT2,SOD2,SPAR<br>C,SPG21,SPON2,SP<br>OP,SPTBN1,SPTBN2<br>,ST3GAL4,STARD7,S<br>TIP1,STK24,STK40,S<br>TOM,STT3B,STX18,S<br>TX8,STXBP3,SULF2,<br>SUMF1,SYAP1,SYNE<br>1,SYT1,TBC1D16,TB<br>C1D20,TBC1D24,TB<br>RG4,TCIM,TCP1,TEP<br>1,TEX2,THAP4,THRS<br>P,TIFA,TIGD2,TIMM1<br>0,TIMM44,TK1,TLCD<br>4,TLE1,TMBIM1,TME<br>M126A,TMEM219,TM<br>EM41A,TMEM41B,T<br>MEM51,TMEM62,TM<br>EM97,TNFAIP2,TNFA<br>IP8L1,TNRC6A,TOP1<br>MT,TPI1,TPR,TPRG1<br>L,TPRKB,TRIB3,TRM<br>T1,TSN,TSPAN33,TS<br>TA3,TTC1,TTC19,TU<br>BB,TUBB6,TUBGCP2<br>,TXN2,TXNL1,UBAC1<br>,UBE2F,UBE2L3,UBR<br>1,UBTF,UBXN1,UBX<br>N6,UCK1,UGP2,UGT<br>2B10,ULK1,UNG,UP<br>P2,UROC1,UROD,US<br>P47,UTP14A,UTRN,U<br>XS1,VPS13A,WDR18<br>,WDR26,WDR81,WIP<br>I2,WNT5B,YPEL3,YW<br>HAH,ZCCHC24,ZFAN<br>D2B,ZKSCAN1,ZNF2<br>3,ZNF32,ZNF326,ZN<br>F654 | 198 |
|                                                                                     |           |                 |          |        | ABCB1,ABCB4,ABC<br>G2,ACAD8,ACLY,AC<br>OX2,ACSL3,ACSL4,A<br>CSM1,ACSS2,AGPA<br>T2,AHNAK,AKAP11,A<br>LDH1L1,ALG13,ANK                                                                                                                                                                                                                                                                                                                                                                                                                                                                                                                                                                                                                                                                                                                                                                                                                                                                                                                                                                                                                                                            |     |

RD12,ARHGAP18,ARHGAP6,ARIH2,ASAP2,ATP1A1,ATP6V1D,ATXN2L,BAAT,BAP1,BDH1,BRD8,CA3,CBLB,CD2AP,CDH1,CDH2,CDO1,CES1,CGN,CHD6,CLDND1,CNOT4,CNOT6,CNP,COL5A3,CPT1A,CSRNP1,CYP7A1,CYTH1,DCTN1,DDX60,DGKZ,DICER1,DMD,DOCK4,DSP,EFHD2,EGR1,EIF1AX,EIF4EBP1,ERBB3,F11,FAM160B1,FAM89A,FGA,FGFR2,FGFRL1,FH,FKBP4,FLCN,FOXK1,FOXO3,GDA,GNA12,GOLGB1,GPD2,GSDMD,GTF2A2,HLF,HMGCR,HRAS,HSD3B7,HSPB1,ID2,IGFBP2,ING4,IRS1,AK2,JMJD1C,KDM6A,KIAA0100,KTN1,LARS2,LGALS4,LGR5,LIN7C,LITAF,LRIG1,LRP12,LRRC28,LSS,LTBR,MAGI3,MBNL2,MIA2,MKNK2,MLLT10,MMD,MOCOS,MON2,MPDZ,MPRIIP,MRPS25,MYO5B,MYO6,N4BP2,NCOA1,NFKBIA,NIPBL,NME1,NRIP1,NUDT7,NUP88,OAZ1,OTUD6B,PAN3,PCDH1,PDGFRB,PDP2,PPDK1,PER1,PEX6,PIK3CA,PKHD1,PLD1,PLXNA2,POR,PPIF,PPP1R1B,PPP1R3B,PPP1R9A,PPP2R1A,PPRPF6,PSEN2,PSMD1,PSMD2,PXMP4,RAB11FIP2,RALGPS2,RCAN1,RCL1,REPIN1,RHOD,RNF144A,ROCK1,SBF2,SCAPER,SCARB2,SCYL1,SDC4,SDR42E1,SECISBP2L,SERPINA6,SERPINE2,SESN3,SIRT5,SLC16A5,SLC1A4,SLC25A32,SLC39A10,SLC6A12,SLK,SMAP1,SNRNP200,SPARC,SPOP,SPTBN1,SPTBN2,ST3GAL4,STX8,STXBP3,SULF2,SYNE1,TBC1D16,TBC1D24,T



|                                                                          |             |                               |          |        |                                                                                                                                                                                                                                                                                                                                                                                                                                                                                                                                                                                                                                                                                                                                                                                                                                                                                                                                                                                           |     |
|--------------------------------------------------------------------------|-------------|-------------------------------|----------|--------|-------------------------------------------------------------------------------------------------------------------------------------------------------------------------------------------------------------------------------------------------------------------------------------------------------------------------------------------------------------------------------------------------------------------------------------------------------------------------------------------------------------------------------------------------------------------------------------------------------------------------------------------------------------------------------------------------------------------------------------------------------------------------------------------------------------------------------------------------------------------------------------------------------------------------------------------------------------------------------------------|-----|
| Cancer, Organismal Injury And Abnormalities, Reproductive System Disease | Neoplasia   | Neoplasia Of Mammary Gland    | 1.06E-03 | -1.131 | K1, TNFAIP2, TNRC6A, TOP1MT, TPR, TRMT1, TSPAN33, UBAC1, UBE2F, UBR1, UROC1, USP47, UTRN, VPS13A, YPEL3, ZKSCAN1, ZNF654                                                                                                                                                                                                                                                                                                                                                                                                                                                                                                                                                                                                                                                                                                                                                                                                                                                                  | 6   |
| Cancer, Organismal Injury And Abnormalities                              | Development | Development Of Adenocarcinoma | 5.73E-09 | -1.134 | CEBPD, ERBB3, HRAS, IRS1, JAK2, PIK3CA                                                                                                                                                                                                                                                                                                                                                                                                                                                                                                                                                                                                                                                                                                                                                                                                                                                                                                                                                    | 262 |
|                                                                          |             |                               |          |        | ABCB1, ABCB4, ABCG5, ACAD8, ACOX2, ACSL3, ACSL4, ACSM1, ACSS2, AGPAT2, AHNAK, AKAP11, AKAP9, ALAS1, ALDH1L1, ALG13, ANKRD12, ANP32A, ARHGAP21, ARHGAP6, ARIH2, ARL15, ATXN2L, AUH, BAP1, BDH1, BRD8, BUD23, CAPN2, CCT3, CCT5, CCT6A, CCT7, CD47, CD9, CDC14B, CDH1, CDH2, CDO1, CES1, CGN, CHD6, CLMN, CMTM8, CNOT4, CNOT6, COL27A1, COL5A3, CPEB4, CS, CUL4B, CXADR, CYP4F2, CYP7A1, DAZAP1, DDX60, DEK, DHX9, DIAPH2, DICER1, DIO1, DIPK2A, DIXDC1, DMD, DOCK4, DPP4, DPP9, DSP, DSTN, DUSP19, E2F5, EIF1AX, ELF1, ERBB3, EXOC6, EXTL2, F11, F2R, F3, FAM160B1, FECH, FGA, FGB, FGFR2, FGG, FH, FLCN, FOXO3, FTSJ3, G6PD, GAS2L3, GNA12, GOLGB1, GRHPR, GSK3A, GSTM2, GTF3C2, GYG1, HECA, HECTD3, HERC4, HMGCR, HRAS, ICK, IGFBP2, IL18, ING4, IRF6, IRS1, ITPA, JAK2, JMJD1C, KAT2B, KCMF1, KDM6A, KEAP1, KIAA0100, KLHL7, KTN1, KYNU, L2HGDH, LGR5, LMNA, LRIG1, LRRC28, LSM14B, MAGED1, MAGI3, MAP2K3, MCOLN1, MEF2A, MIA2, MLLT10, MOCOS, MON2, MPDZ, MPP1, MPRIP, MRPL44, MRPS22, |     |

Cancer, Organismal  
Injury And  
Abnormalities

Lymphoreticul  
ar Neoplasm

Lymphoreticula  
r Neoplasm

6,06E-05

-1,152

MRPS27, MYO5B, MYO6, N4BP2L1, NCOA1, NDUFA9, NET1, NFKBIA, NGEF, NHLRC2, NIPBL, NME1, NOSIP, NPC1, NRIP1, NUDT1, NUP62, NUP88, OSBP1A, OXR1, PALMD, PAN2, PAN3, PCGF5, PDCD2, PDE2A, PDGFRB, PDLIM1, PDP2, PER1, PER3, PGAP1, PHF20L1, PHKA2, PIK3CA, PKHD1, PLXNA2, PNKD, POR, PPP1R1B, PPP1R9A, PPP2R1A, PRPF19, PRPF6, PSMD1, PSMD2, PTBP2, RABEPK, RABGAP1L, RAI14, RALGPS2, RB1CC1, RBBP5, RBBP7, RCL1, RHBDD1, RICTOR, ROCK1, RPA1, RPIA, SBF2, SCAPER, SECISBP2L, SENP6, SESN3, SETDB2, SLC1A4, SLC20A1, SLC20A2, SLC2A2, SLC2A9, SLC35B3, SLC39A10, SLC39A8, SLC9A3R1, SMAD7, SNRNP200, SNX10, SOD2, SPARC, SPON2, SPOP, SPTBN1, SPTBN2, STARD7, STK24, STK40, STOM, STT3B, STX8, STXBP3, SYNE1, TBC1D20, TBRG4, TEP1, TIGD2, TK1, TLCD4, TLE1, TMEM126A, TMEM51, TNFAIP2, TOP1MT, TPI1, TPR, TPRG1L, TRIB3, TTC1, TUBB, TUBB6, TXNL1, UBE2F, UGP2, UGT2B10, UTP14A, UTRN, UXS1, VPS13A, ZCCHC24, ZFAND2B, ZKSCAN1, ZNF32, ABCB1, ABCB4, ABCG2, ABCG5, ABCG8, ACSL4, AHNK, AKAP11, ALAS1, ANXA7, ASP2, ATG4D, ATP1A1, ATP1B1, BAAT, BAP1, BMT, CAPN2, CBLB, CCT3, CCT7, CD47, CD4, CDH1, CDO1, CHD6, CNP, COL27A1, CPT1A, CTPS2, CTSH, DAZAP1, DDX60, DEK, DGKZ, DHX9, DICER1, DPK2A, DMD, DMTF1, D

154

|                                                                                           |                 |                 |          |        |                                                                                                                                                                                                                                                                                                                                                                                                                                                                                                                                                                                                                                                                                                                                                                                                                                                                                                                                                                                                                                                                                                                                                                                                                                                                                           |     |
|-------------------------------------------------------------------------------------------|-----------------|-----------------|----------|--------|-------------------------------------------------------------------------------------------------------------------------------------------------------------------------------------------------------------------------------------------------------------------------------------------------------------------------------------------------------------------------------------------------------------------------------------------------------------------------------------------------------------------------------------------------------------------------------------------------------------------------------------------------------------------------------------------------------------------------------------------------------------------------------------------------------------------------------------------------------------------------------------------------------------------------------------------------------------------------------------------------------------------------------------------------------------------------------------------------------------------------------------------------------------------------------------------------------------------------------------------------------------------------------------------|-----|
| Endocrine System Disorders, Gastrointestinal Disease, Organismal Injury And Abnormalities | Pancreatic Mass | Pancreatic Mass | 6.08E-04 | -1.154 | NAJC5,DPP4,DSP,E<br>CHDC3,EGR1,EIF4E<br>BP1,ERBB3,F3,FAM1<br>02A,FBXO31,FGFR2,<br>FGG,FOXO3,FPGS,G<br>NA12,GPD2,GYG1,H<br>ECA,HECTD3,HMG2<br>0B,HMGCR,HNRNPD<br>,HOOK1,HRAS,ICK,I<br>D2,ID4,IL18,IRS1,JA<br>K2,JMJD1C,KDM6A,<br>KIAA0100,KITLG,KP<br>NB1,LARS2,LGALS4,<br>LPIN1,LRIG1,LRRC3,<br>MAP2K3,MEF2A,MIA<br>2,MKNK2,MLLT10,M<br>PDZ,MRPL20,MRPL4<br>4,MYO5B,NET1,NFK<br>BIA,NINJ1,NME1,NRI<br>P1,NUP88,OSBPL1A,<br>PALMD,PAN3,PAQR<br>9,PDGFC,PDGFRB,P<br>DPK1,PER1,PER3,P<br>ES1,PEX6,PIK3AP1,<br>PIK3CA,PKHD1,PLX<br>NA2,POLE4,POR,PP<br>M1A,PPP1R14B,PPP<br>1R1B,PPP1R3B,PRP<br>S1,PSEN2,PSMD1,P<br>SMD2,PSME2,RAN,R<br>HOD,RICTOR,RPA1,<br>SARS1,SCARB2,SER<br>PINH1,SGK2,SHMT1,<br>SHPRH,SMAD7,SOA<br>T2,SOD2,SPARC,SP<br>TBN1,STIP1,STK24,S<br>TK40,SYNE1,SYT1,T<br>CIM,TEP1,TPI1,TPR,<br>TUBB6,TUT4,UBE2F,<br>UBR1,UBXN1,UGT2B<br>10,UNG,UROC1,VPS<br>13A<br>AASDH,ABCB4,ABC<br>G2,ABTB2,ACAT2,A<br>CLY,ACSM5,ADH4,A<br>HNAK,AKAP11,AKAP<br>9,ALG13,ANKRD12,A<br>NP32A,BAP1,BRD8,<br>C9orf152,CAMKK2,C<br>APN2,CBLB,CCDC66<br>,CDH1,CDH2,CHD6,<br>COL5A3,CUL4B,CYL<br>D,CYP4F2,DCTN1,D<br>HX9,DIAPH2,DMD,D<br>OCK4,DPP4,E2F5,E<br>CHDC3,EGR1,EIF1A<br>X,ERBB3,ESRRA,EX<br>OC6,F11,F3,FGA,FG<br>FR2,FMO1,FTSJ3,GA<br>S2L3,GCLC,GOLGB1<br>,GRHPR,HERC4,HM<br>GCR,HNRNPC,HRAS | 140 |
|-------------------------------------------------------------------------------------------|-----------------|-----------------|----------|--------|-------------------------------------------------------------------------------------------------------------------------------------------------------------------------------------------------------------------------------------------------------------------------------------------------------------------------------------------------------------------------------------------------------------------------------------------------------------------------------------------------------------------------------------------------------------------------------------------------------------------------------------------------------------------------------------------------------------------------------------------------------------------------------------------------------------------------------------------------------------------------------------------------------------------------------------------------------------------------------------------------------------------------------------------------------------------------------------------------------------------------------------------------------------------------------------------------------------------------------------------------------------------------------------------|-----|

|                                                                                                                   |                     |                     |          |        |                                                                                                                                                                                                                                                                                                                                                                                                                                                                                                                                                                                                                                                                                          |     |
|-------------------------------------------------------------------------------------------------------------------|---------------------|---------------------|----------|--------|------------------------------------------------------------------------------------------------------------------------------------------------------------------------------------------------------------------------------------------------------------------------------------------------------------------------------------------------------------------------------------------------------------------------------------------------------------------------------------------------------------------------------------------------------------------------------------------------------------------------------------------------------------------------------------------|-----|
|                                                                                                                   |                     |                     |          |        | ,IL18,IRF6,JAK2,KDM<br>6A,KEAP1,KIAA0100,<br>KLF12,KLF9,LGR5,LI<br>N7A,LMNA,LRIG1,LS<br>M14B,LSS,MAGI3,MI<br>A2,MKNK2,MPDZ,MR<br>PL24,MRPS27,MYO1<br>B,MYO5B,NAGK,NC<br>OA1,NGEF,NINJ1,NI<br>PBL,NPC1,NR5A2,P<br>AN2,PAQR9,PCDH1,<br>PDGFRB,PHKA2,PIK<br>3CA,PKHD1,PLXNA2<br>,POR,PPP1R9A,PPP<br>2R1A,PRPF6,PRPS1,<br>PSMD1,PSMD11,PS<br>MF1,PXMP4,RAB11F<br>IP2,RB1CC1,RBBP5,<br>RHOD,RPA1,SBF2,S<br>CAPER,SEC63,SERP<br>INE2,SERPINH1,SET<br>DB2,SHMT1,SHPRH,<br>SLC20A2,SLC2A5,SL<br>C2A9,SLC35B1,SLC9<br>A3R1,SMAD7,SNX10<br>,SPTBN1,ST3GAL4,S<br>TARD7,SYNE1,TEP1,<br>TEX2,TMEM126A,TN<br>RC6A,TOP1MT,TRIB<br>3,TUBB6,TUBGCP2,<br>TXNL1,UGP2,UROD,<br>UTRN,WNT5B,ZFAN<br>D2B,ZNF654 |     |
| Cancer,Endocrine<br>System<br>Disorders,Gastrointe<br>stinal<br>Disease,Organismal<br>Injury And<br>Abnormalities | Pancreatic<br>Tumor | Pancreatic<br>Tumor | 8.25E-04 | -1.154 | AASDH,ABCB4,ABC<br>G2,ABTB2,ACAT2,A<br>CLY,ACSM5,ADH4,A<br>HNAK,AKAP11,AKAP<br>9,ALG13,ANKRD12,A<br>NP32A,BAP1,BRD8,<br>C9orf152,CAMKK2,C<br>APN2,CBLB,CCDC66<br>,CDH1,CDH2,CHD6,<br>COL5A3,CUL4B,CYL<br>D,CYP4F2,DCTN1,D<br>HX9,DIAPH2,DMD,D<br>OCK4,DPP4,E2F5,E<br>CHDC3,EGR1,EIF1A<br>X,ERBB3,ESRRA,EX<br>OC6,F11,F3,FGA,FG<br>FR2,FMO1,FTSJ3,GA<br>S2L3,GCLC,GOLGB1<br>,GRHPR,HERC4,HM<br>GCR,HNRNPC,HRAS<br>,IL18,IRF6,JAK2,KDM<br>6A,KEAP1,KIAA0100,<br>KLF12,KLF9,LGR5,LI<br>N7A,LMNA,LRIG1,LS<br>M14B,LSS,MAGI3,MI<br>A2,MKNK2,MPDZ,MR<br>PL24,MRPS27,MYO1<br>B,MYO5B,NAGK,NC<br>OA1,NGEF,NINJ1,NI                                                                               | 139 |

|                                                  |               |                            |          |        |                                                                                                                                                                                                                                                                                                                                                                                                                                                                                                                                                                                                                                                                                                                                                                                              |     |
|--------------------------------------------------|---------------|----------------------------|----------|--------|----------------------------------------------------------------------------------------------------------------------------------------------------------------------------------------------------------------------------------------------------------------------------------------------------------------------------------------------------------------------------------------------------------------------------------------------------------------------------------------------------------------------------------------------------------------------------------------------------------------------------------------------------------------------------------------------------------------------------------------------------------------------------------------------|-----|
|                                                  |               |                            |          |        | PBL,NPC1,NR5A2,P<br>AN2,PAQR9,PCDH1,<br>PDGFRB,PHKA2,PIK<br>3CA,PKHD1,PLXNA2<br>,POR,PPP1R9A,PPP<br>2R1A,PRPF6,PRPS1,<br>PSMD1,PSMD11,PS<br>MF1,PXMP4,RAB11F<br>IP2,RB1CC1,RBBP5,<br>RHOD,RPA1,SBF2,S<br>CAPER,SEC63,SERP<br>INE2,SERPINH1,SET<br>DB2,SHMT1,SHPRH,<br>SLC20A2,SLC2A5,SL<br>C2A9,SLC35B1,SLC9<br>A3R1,SNX10,SPTBN<br>1,ST3GAL4,STARD7,<br>SYNE1,TEP1,TEX2,T<br>MEM126A,TNRC6A,T<br>OP1MT,TRIB3,TUBB<br>6,TUBGCP2,TXNL1,<br>UGP2,UROD,UTRN,<br>WNT5B,ZFAND2B,Z<br>NF654                                                                                                                                                                                                                                                                                                        |     |
| Cancer,Organismal<br>Injury And<br>Abnormalities | Tumorigenesis | Tumorigenesis<br>Of Tissue | 6.34E-29 | -1.156 | AASDH,ABCB1,ABC<br>B4,ABCG2,ABCG5,A<br>BCG8,ABTB2,ACAD8<br>,ACAT2,ACLY,ACOX<br>2,ACSL3,ACSL4,ACS<br>L5,ACSM1,ACSM5,A<br>CSS2,ACTR6,ADH4,<br>AFG3L2,AGPAT2,AH<br>CY,AHNAK,AHSA1,A<br>KAP11,AKAP9,AKR1<br>D1,ALAS1,ALDH1L1,<br>ALG13,AMDHD1,AN<br>KRD12,ANP32A,ANX<br>A7,ARF3,ARGLU1,A<br>RHGAP18,ARHGAP2<br>1,ARHGAP6,ARIH2,A<br>RL15,ARL4A,ARL6IP<br>4,ARSG,ASAP2,ASB<br>13,ATG3,ATG4D,ATP<br>1A1,ATP1B1,ATP6V1<br>D,ATXN2L,AUH,BAA<br>T,BAP1,BDH1,BHMT,<br>BHMT2,BID,BIK,BLM<br>H,BRD8,BUD23,C11o<br>rf54,C9orf152,C9orf1<br>6,CA3,CAMKK2,CAP<br>N2,CARS1,CBLB,CC<br>BE1,CCDC66,CCT3,<br>CCT4,CCT5,CCT6A,<br>CCT7,CD2AP,CD47,<br>CD9,CD99L2,CDA,C<br>DC14B,CDH1,CDH2,<br>CDO1,CEBPD,CENP<br>V,CES1,CGN,CHCH<br>D3,CHCHD4,CHD6,C<br>HPT1,CHRA1,CIB3,<br>CITED2,CLDND1,CL<br>K2,CLMN,CLOCK,CM | 585 |

TM6,CMTM8,CNN3,C  
NOT4,CNOT6,CNP,C  
OL27A1,COL5A3,CO  
RO1B,CPEB4,CPT1A  
,CRIP2,CRLS1,CROT  
,CS,CSRNP1,CTDSP  
1,CTPS2,CTSH,CUL4  
B,CXADR,CYB5B,CY  
LD,CYP2U1,CYP39A  
1,CYP4F2,CYP7A1,C  
YTH1,DAZAP1,DCTN  
1,DDC,DDX60,DEK,D  
GKZ,DHX9,DIAPH2,D  
ICER1,DIO1,DIPK2A,  
DIXDC1,DMD,DMTF1  
,DNAJB1,DNAJC5,D  
OCK4,DPP4,DPP9,D  
SP,DSTN,DTYMK,DU  
SP19,DVL1,E2F5,EC  
HDC1,ECHDC3,EEP  
D1,EFHD2,EGR1,EIF  
1AX,EIF4EBP1,ELF1,  
ENDOG,ENPP1,ERB  
B3,ESRRA,EXOC6,E  
XOSC2,EXTL2,F11,F  
2R,F3,FADS2,FAM10  
2A,FAM118B,FAM16  
0B1,FAM172A,FAM7  
6B,FAM89A,FBXO31,  
FBXO9,FECH,FGA,F  
GB,FGFR2,FGFRL1,  
FGG,FH,FKBP4,FLC  
N,FMO1,FMO5,FOXK  
1,FOXO3,FPGS,FTSJ  
3,G6PD,GAS2L3,GC  
AT,GCLC,GCNT2,GD  
A,GNA12,GNG12,GO  
LGB1,GPD2,GPN1,G  
RHPR,GSDMD,GSK3  
A,GSS,GSTM2,GTF2  
A2,GTF2F1,GTF3C2,  
GYG1,HECA,HECTD  
3,HERC4,HLF,HMG2  
0B,HMGCR,HNRNPC  
,HNRNPD,HOMER2,  
HOOK1,HRAS,HSD1  
7B2,HSD3B7,HSPB1,  
ICK,ID2,ID4,IGFBP2,I  
L18,ING4,IRF6,IRS1,I  
TPA,ITPK1,JAK2,JMJ  
D1C,KAT2B,KCMF1,  
KDM6A,KEAP1,KHK,  
KIAA0100,KITLG,KLF  
12,KLF9,KLHDC2,KL  
HL21,KLHL7,KPNB1,  
KTN1,KYNU,L2HGD  
H,LARS2,LGALS4,LG  
R5,LIN7A,LIN7C,LITA  
F,LMNA,LPIN1,LRIG1  
,LRP12,LRRC28,LRR  
C3,LSM14B,LSS,LTB  
R,MACROH2A1,MAG

ED1,MAGI3,MAP1LC  
3B,MAP2K3,MAP3K7  
,MBNL2,MCOLN1,ME  
F2A,MIA2,MKNK2,ML  
LT10,MLX,MMD,MOC  
OS,MON2,MPDZ,MP  
P1,MPRIIP,MRNIP,M  
RPL12,MRPL20,MRP  
L24,MRPL44,MRPS2  
2,MRPS25,MRPS27,  
MRPS9,MT1F,MYO1  
B,MYO5B,MYO6,N4B  
P2,N4BP2L1,NAGK,N  
CALD,NCOA1,NDUF  
A12,NDUFA9,NDUFB  
9,NEK7,NET1,NFKBI  
A,NGEF,NHLRC2,NI  
NJ1,NIPBL,NME1,NO  
SIP,NPC1,NR1H4,NR  
2F6,NR3C2,NR5A2,N  
RIP1,NT5C,NUDT1,N  
UDT19,NUDT7,NUP6  
2,NUP88,NUS1,OAZ1  
,OSBPL1A,OTUD6B,  
OXR1,PALMD,PAN2,  
PAN3,PAQR9,PCDH  
1,PCGF5,PDCD2,PD  
E2A,PDE9A,PDGFC,  
PDGFRB,PDLIM1,PD  
P2,PDPK1,PDRG1,P  
ER1,PER3,PES1,PE  
X26,PEX6,PFDN2,PF  
KFB1,PGAP1,PHF20  
L1,PHKA2,PIK3AP1,  
PIK3CA,PKHD1,PLD  
1,PLXNA2,PMPCA,P  
NKD,PNRC1,POLE4,  
POR,PPIF,PPM1A,P  
POX,PPP1R12A,PPP  
1R14B,PPP1R1B,PP  
P1R3B,PPP1R9A,PP  
P2R1A,PRDX6,PRPF  
19,PRPF39,PRPF6,P  
RPS1,PRPS2,PSEN2  
,PSMA6,PSMD1,PSM  
D11,PSMD2,PSMD8,  
PSME2,PSMG1,PSP  
C1,PSPH,PTBP1,PT  
BP2,PXMP4,QDPR,R  
AB11FIP2,RAB1B,RA  
BEPK,RABGAP1L,RA  
I14,RALGPS2,RAN,R  
ASA3,RASSF3,RB1C  
C1,RBBP5,RBBP7,R  
BKS,RCAN1,RCL1,R  
EPIN1,RGS2,RHBDD  
1,RHOD,RICTOR,RN  
F14,RNF144A,RNF16  
7,ROCK1,RPA1,RPIA  
,RUFY3,SAA4,SAR1  
B,SARS1,SBF2,SCA  
PER,SCARB2,SCYL1

Gastrointestinal  
Disease,Organismal  
Injury And  
Abnormalities

Colorectal  
Disorder

Colorectal  
Disorder

3.45E-07

-1.159

,SDC4,SDR42E1,SE  
C63,SECISBP2L,SEN  
P6,SERPINA6,SERPI  
NE2,SERPINH1,SES  
N3,SETDB2,SFRP5,S  
GK2,SGTB,SH3D19,  
SHMT1,SHPRH,SIRT  
5,SLC10A1,SLC16A5  
,SLC1A4,SLC20A1,S  
LC20A2,SLC25A32,S  
LC27A2,SLC2A2,SLC  
2A5,SLC2A9,SLC30A  
10,SLC35A3,SLC35B  
1,SLC35B3,SLC38A2  
,SLC39A10,SLC39A8  
,SLC6A12,SLC9A3R1  
,SLK,SMAD7,SMAP1,  
SNAPC2,SNRNP200,  
SNTB1,SNX10,SNX5,  
SNX9,SOAT2,SOD2,  
SPARC,SPG21,SPO  
N2,SPOP,SPTBN1,S  
PTBN2,ST3GAL4,ST  
ARD7,STIP1,STK24,  
STK40,STOM,STT3B,  
STX18,STX8,STXBP  
3,SULF2,SUMF1,SYA  
P1,SYNE1,SYT1,TBC  
1D16,TBC1D20,TBC1  
D24,TBRG4,TCIM,TC  
P1,TEP1,TEX2,THAP  
4,THRSP,TIFA,TIGD2  
,TIMM10,TIMM44,TK  
1,TLCD4,TLE1,TMBI  
M1,TMEM126A,TME  
M219,TMEM41A,TME  
M41B,TMEM51,TME  
M62,TMEM97,TNFAI  
P2,TNFAIP8L1,TNRC  
6A,TOP1MT,TPI1,TP  
R,TPRG1L,TPRKB,T  
RIB3,TRMT1,TSN,TS  
PAN33,TSTA3,TTC1,  
TTC19,TUBB,TUBB6,  
TUBGCP2,TXN2,TXN  
L1,UBAC1,UBE2F,UB  
E2L3,UBR1,UBTF,UB  
XN1,UBXN6,UCK1,U  
GP2,UGT2B10,ULK1,  
UNG,UPP2,UROC1,U  
ROD,USP47,UTP14A  
,UTRN,UXS1,VPS13  
A,WDR18,WDR26,W  
DR81,WIP1,WNT5B,  
YPEL3,YWHAH,ZCC  
HC24,ZFAND2B,ZKS  
CAN1,ZNF23,ZNF32,  
ZNF326,ZNF654  
AASDH,ABCB1,ABC  
G2,ABCG5,ACLY,AC  
OX2,ACSL5,ACSS2,  
ACTR6,AFG3L2,AGP

278



AT2,AHCY,AHNAK,A  
KAP9,ALAS1,ALDH1  
L1,ALG13,ANXA7,AR  
HGAP21,ARL6IP4,AS  
AP2,ASB13,ATG3,AT  
G4D,ATP1B1,ATXN2  
L,BAAT,BAP1,BID,C1  
orf54,C9orf152,C9orf16,  
CARS1,CCDC66,  
CCT4,CCT5,CCT7,C  
D2AP,CD47,CD9,CD  
99L2,CDH1,CDH2,C  
DO1,CEBPD,CES1,C  
GN,CHCHD3,CHD6,  
CHPT1,CHRA1,CL  
DND1,CLK2,CLMN,C  
LOCK,CMTM6,CNOT  
4,CNP,COL27A1,CO  
L5A3,CPEB4,CPT1A,  
CS,CTDSP1,CTPS2,  
CUL4B,CYLD,CYP4F  
2,DCTN1,DDX60,DG  
KZ,DHX9,DICER1,D  
MD,DMTF1,DOCK4,D  
STN,EGR1,EIF4EBP  
1,ELF1,ERBB3,ESRR  
A,F2R,F3,FAM160B1,  
FECH,FGA,FGB,FGF  
R2,FGG,FLCN,FMO1  
,FMO5,FOXO3,FPGS  
,G6PD,GAS2L3,GNA  
12,GNG12,GSS,GTF  
2F1,HECA,HECTD3,  
HMGCR,HNRNPC,H  
RAS,HSD17B2,HSPB  
1,ICK,ID2,IGFBP2,IL1  
8,ING4,IRF6,IRS1,JA  
K2,JMJD1C,KAT2B,K  
DM6A,KEAP1,KIAA0  
100,KITLG,KLF12,KL  
HL7,KPNB1,KTN1,LG  
ALS4,LGR5,LIN7A,L  
RIG1,LRP12,LRR3,  
LTBR,MACROH2A1,  
MAGED1,MAP3K7,M  
EF2A,MIA2,MKNK2,  
MLLT10,MLX,MON2,  
MPDZ,MPRIIP,MRNIP  
,MRPS9,MT1F,MYO5  
B,MYO6,NCOA1,NEK  
7,NET1,NFKBIA,NGE  
F,NHLRC2,NIPBL,NM  
E1,NOSIP,NR1H4,NR  
3C2,NR5A2,NT5C,N  
UDT19,NUDT7,NUP6  
2,OAZ1,OSBPL1A,PA  
QR9,PCDH1,PCGF5,  
PDE9A,PDGFRB,PD  
LIM1,PDP2,PDPK1,P  
DRG1,PER1,PFDN2,  
PGAP1,PHF20L1,PH  
KA2,PIK3AP1,PIK3C

|                                                  |                      |                                   |          |        |                                                                                                                                                                                                                                                                                                                                                                                                                                                                                                                                                                                                                                                                                                                                                                                         |     |
|--------------------------------------------------|----------------------|-----------------------------------|----------|--------|-----------------------------------------------------------------------------------------------------------------------------------------------------------------------------------------------------------------------------------------------------------------------------------------------------------------------------------------------------------------------------------------------------------------------------------------------------------------------------------------------------------------------------------------------------------------------------------------------------------------------------------------------------------------------------------------------------------------------------------------------------------------------------------------|-----|
|                                                  |                      |                                   |          |        | A,PKHD1,PLD1,PLX<br>NA2,PNKD,PNRC1,P<br>OR,PPP1R14B,PPP1<br>R1B,PPP1R9A,PPP2<br>R1A,PRDX6,PRPF39,<br>PRPF6,PSMD8,PTBP<br>1,QDPR,RABGAP1L,<br>RASSF3,RB1CC1,RB<br>BP5,RICTOR,ROCK1<br>,RPA1,RUFY3,SAA4,<br>SBF2,SCAPER,SCYL<br>1,SEC63,SECISBP2L<br>,SENP6,SERPINE2,S<br>ESN3,SGK2,SHPRH,<br>SLC1A4,SLC20A1,SL<br>C20A2,SLC27A2,SLC<br>2A2,SLC2A5,SLC30A<br>10,SLC35B3,SLC38A<br>2,SLC39A10,SLC39A<br>8,SLC6A12,SMAD7,S<br>MAP1,SNRNP200,SN<br>X9,SOAT2,SOD2,SP<br>ARC,SPOP,SPTBN1,<br>SPTBN2,STIP1,STX8<br>,SULF2,SYAP1,SYNE<br>1,SYT1,TBC1D16,TB<br>C1D24,TBRG4,TCP1,<br>TEP1,TIMM44,TK1,T<br>MEM126A,TMEM41B<br>,TMEM97,TNRC6A,T<br>OP1MT,TPI1,TPR,TR<br>IB3,TSTA3,TTC1,TU<br>BB,UBAC1,UBTF,UG<br>P2,ULK1,UNG,UROC<br>1,UTRN,VPS13A,WD<br>R18,WDR26,WDR81,<br>WNT5B,ZCCHC24,Z<br>NF23 |     |
| Cell-To-Cell<br>Signaling And<br>Interaction     | Binding              | Binding Of<br>Tumor Cell<br>Lines | 5.02E-04 | -1.215 | ARHGAP21,CD47,CD<br>9,CDH1,CDH2,CXAD<br>R,CYTH1,DPP4,DSP,<br>EGR1,ERBB3,F2R,F3<br>,FGA,FGFR2,HRAS,I<br>L18,IRS1,JAK2,LGAL<br>S4,LTBR,MYO6,NET<br>1,NFKBIA,NME1,NR1<br>H4,PLD1,RCAN1,TCI<br>M,UTRN                                                                                                                                                                                                                                                                                                                                                                                                                                                                                                                                                                                       | 30  |
| Cancer,Organismal<br>Injury And<br>Abnormalities | Adenoma<br>Formation | Adenoma                           | 1.35E-05 | -1.226 | ABCB1,ABCG2,ATP1<br>A1,BHMT,BID,C9orf1<br>6,CDH1,CDH2,CEBP<br>D,CLMN,EGR1,EIF4E<br>BP1,ERBB3,FGFR2,F<br>OXO3,GSK3A,HRAS,<br>ICK,ID4,LRIG1,NR1H<br>4,NR3C2,NR5A2,NRI<br>P1,NUDT1,OAZ1,OS<br>BPL1A,PIK3CA,PRD<br>X6,SLC30A10,SPOP,<br>SPTBN1,TRIB3,UGP<br>2,UNG                                                                                                                                                                                                                                                                                                                                                                                                                                                                                                                           | 35  |
| Cancer,Organismal                                | Nonhematologi        | Nonhematologi                     | 1.38E-31 | -1.303 | AASDH,ABCB1,ABC                                                                                                                                                                                                                                                                                                                                                                                                                                                                                                                                                                                                                                                                                                                                                                         | 592 |

Injury And  
Abnormalities

c Malignant  
Neoplasm

c Malignant  
Neoplasm

B4,ABCG2,ABCG5,A  
BCG8,ABTB2,ACAD8  
,ACAT2,ACLY,ACOX  
2,ACSL3,ACSL4,ACS  
L5,ACSM1,ACSM5,A  
CSS2,ACTR6,ADH4,  
AFG3L2,AGPAT2,AH  
CY,AHNAK,AHSA1,A  
KAP11,AKAP9,AKR1  
D1,ALAS1,ALDH1L1,  
ALG13,AMDHD1,AN  
KRD12,ANP32A,ANX  
A7,ARF3,ARGLU1,A  
RHGAP18,ARHGAP2  
1,ARHGAP6,ARIH2,A  
RL15,ARL4A,ARL6IP  
4,ARSG,ASAP2,ASB  
13,ATG3,ATG4D,ATP  
1A1,ATP1B1,ATP6V1  
D,ATXN2L,AUH,BAA  
T,BAP1,BDH1,BHMT,  
BHMT2,BID,BIK,BLM  
H,BRD8,BUD23,C11o  
rf54,C9orf152,C9orf1  
6,CA3,CAMKK2,CAP  
N2,CARS1,CBLB,CC  
BE1,CCDC66,CCT3,  
CCT4,CCT5,CCT6A,  
CCT7,CD2AP,CD47,  
CD9,CD99L2,CDA,C  
DC14B,CDH1,CDH2,  
CDO1,CEBPD,CENP  
V,CES1,CGN,CHCH  
D3,CHCHD4,CHD6,C  
HPT1,CHRA1,CIB3,  
CITED2,CLDND1,CL  
K2,CLMN,CLOCK,CL  
TA,CMTM6,CMTM8,  
CNN3,CNOT4,CNOT  
6,CNP,COL27A1,CO  
L5A3,CORO1B,CPEB  
4,CPT1A,CRIP2,CRL  
S1,CROT,CS,CSRNP  
1,CTDSP1,CTPS2,CT  
SH,CUL4B,CXADR,C  
YB5B,CYLD,CYP2U1  
,CYP39A1,CYP4F2,C  
YP7A1,CYTH1,DAZA  
P1,DCTN1,DDC,DDX  
60,DEK,DGKZ,DHX9,  
DIAPH2,DICER1,DIO  
1,DIPK2A,DIXDC1,D  
MD,DMTF1,DNAJB1,  
DNAJC5,DOCK4,DP  
P4,DPP9,DSP,DSTN,  
DTYMK,DUSP19,DVL  
1,E2F5,ECHDC1,EC  
HDC3,EEPD1,EFHD2  
,EGR1,EIF1AX,EIF4E  
BP1,ELF1,ENDOG,E  
NPP1,ERBB3,ESRRA  
,EXOC6,EXOSC2,EX

TL2,F11,F2R,F3,FAD  
S2,FAM102A,FAM11  
8B,FAM160B1,FAM1  
72A,FAM76B,FAM89  
A,FBXO31,FBXO9,FE  
CH,FGA,FGB,FGFR2  
,FGFRL1,FGG,FH,FK  
BP4,FLCN,FMO1,FM  
O5,FOXK1,FOXO3,F  
PGS,FTSJ3,G6PD,G  
ABARAP,GAS2L3,GC  
AT,GCLC,GCNT2,GD  
A,GNA12,GNG12,GO  
LGB1,GPD2,GPN1,G  
RHPR,GSDMD,GSK3  
A,GSS,GSTM2,GTF2  
A2,GTF2F1,GTF3C2,  
GYG1,HECA,HECTD  
3,HERC4,HLF,HMG2  
0B,HMGCR,HNRNPC  
,HNRNPD,HOMER2,  
HOOK1,HRAS,HSD1  
7B2,HSD3B7,HSPB1,  
ICK,ID2,ID4,IGFBP2,I  
L18,ING4,IRF6,IRS1,I  
TPA,ITPK1,JAK2,JMJ  
D1C,KAT2B,KCMF1,  
KDM6A,KEAP1,KHK,  
KIAA0100,KITLG,KLF  
12,KLF9,KLHDC2,KL  
HL21,KLHL7,KPNB1,  
KTN1,KYNU,L2HGD  
H,LARS2,LGALS4,LG  
R5,LIN7A,LIN7C,LITA  
F,LMNA,LPIN1,LRIG1  
,LRP12,LRRC28,LRR  
C3,LSM14B,LSS,LTB  
R,MACROH2A1,MAG  
ED1,MAGI3,MAP1LC  
3B,MAP2K3,MAP3K7  
,MBNL2,MCOLN1,ME  
F2A,MIA2,MKNK2,ML  
LT10,MLX,MMD,MOC  
OS,MON2,MPDZ,MP  
P1,MPRIIP,MRNIP,M  
RPL12,MRPL20,MRP  
L24,MRPL44,MRPS2  
2,MRPS25,MRPS27,  
MRPS9,MT1F,MYO1  
B,MYO5B,MYO6,N4B  
P2,N4BP2L1,NAGK,N  
CALD,NCOA1,NDUF  
A12,NDUFA9,NDUFB  
9,NEK7,NET1,NFKBI  
A,NGEF,NHLRC2,NI  
CN1,NINJ1,NIPBL,N  
ME1,NOP10,NOSIP,  
NPC1,NR1H4,NR2F6  
,NR3C2,NR5A2,NRIP  
1,NT5C,NUDT1,NUD  
T19,NUDT7,NUP62,N  
UP88,NUS1,OAZ1,O

SBPL1A,OTUD6B,OX  
R1,PALMD,PAN2,PA  
N3,PAQR9,PCDH1,P  
CGF5,PDCD2,PDE2A  
,PDE9A,PDGFC,PDG  
FRB,PDLIM1,PDP2,P  
DPK1,PDRG1,PER1,  
PER3,PES1,PEX26,P  
EX6,PFDN2,PFKFB1,  
PGAP1,PHF20L1,PH  
KA2,PIK3AP1,PIK3C  
A,PKHD1,PLD1,PLX  
NA2,PMPCA,PNKD,P  
NRC1,POR,PPIF,PP  
M1A,PPOX,PPP1R12  
A,PPP1R14B,PPP1R  
1B,PPP1R3B,PPP1R  
9A,PPP2R1A,PRDX6,  
PRPF19,PRPF39,PR  
PF6,PRPS1,PRPS2,P  
SEN2,PSMA6,PSMD  
1,PSMD11,PSMD2,P  
SMD8,PSME2,PSMG  
1,PSPC1,PSPH,PTB  
P1,PTBP2,PXMP4,Q  
DPR,RAB11FIP2,RA  
B1B,RABEPK,RABG  
AP1L,RAI14,RALGPS  
2,RAN,RASA3,RASS  
F3,RB1CC1,RBBP5,  
RBBP7,RBKS,RCAN  
1,RCL1,REPIN1,RGS  
2,RHBDD1,RHOD,RI  
CTOR,RNF14,RNF14  
4A,RNF167,ROCK1,  
RPA1,RPIA,RUFY3,S  
AA4,SAR1B,SARS1,  
SBF2,SCAPER,SCA  
RB2,SCGN,SCOC,S  
CYL1,SDC4,SDR42E  
1,SEC63,SECISBP2L  
,SENP6,SERPINA6,S  
ERPINE2,SERPINH1,  
SESN3,SETDB2,SFR  
P5,SGK2,SGTB,SH3  
BGRL2,SH3D19,SHM  
T1,SHPRH,SIRT5,SL  
C10A1,SLC16A5,SLC  
1A4,SLC20A1,SLC20  
A2,SLC25A32,SLC27  
A2,SLC2A2,SLC2A5,  
SLC2A9,SLC30A10,S  
LC35A3,SLC35B1,SL  
C35B3,SLC38A2,SLC  
39A10,SLC39A8,SLC  
6A12,SLC9A3R1,SLK  
,SMAD7,SMAP1,SNA  
PC2,SNRNP200,SNT  
B1,SNX10,SNX5,SNX  
9,SOAT2,SOD2,SPA  
RC,SPG21,SPON2,S  
POP,SPTBN1,SPTBN

|                                                  |              |              |          |        |                                                                                                                                                                                                                                                                                                                                                                                                                                                                                                                                                                                                                                                                                                                                                                                                                                                                                                                                                                                                                                                                                                                                                                                                                                                                                                             |     |
|--------------------------------------------------|--------------|--------------|----------|--------|-------------------------------------------------------------------------------------------------------------------------------------------------------------------------------------------------------------------------------------------------------------------------------------------------------------------------------------------------------------------------------------------------------------------------------------------------------------------------------------------------------------------------------------------------------------------------------------------------------------------------------------------------------------------------------------------------------------------------------------------------------------------------------------------------------------------------------------------------------------------------------------------------------------------------------------------------------------------------------------------------------------------------------------------------------------------------------------------------------------------------------------------------------------------------------------------------------------------------------------------------------------------------------------------------------------|-----|
| Cancer,Organismal<br>Injury And<br>Abnormalities | Pelvic Tumor | Pelvic Tumor | 1.54E-09 | -1.311 | 2,ST3GAL4,STARD4,<br>STARD7,STIP1,STK2<br>4,STK40,STOM,STT3<br>B,STX18,STX8,STXB<br>P3,SULF2,SUMF1,SY<br>AP1,SYNE1,SYT1,TB<br>C1D16,TBC1D20,TB<br>C1D24,TBRG4,TCIM,<br>TCP1,TEP1,TEX2,TH<br>AP4,THRSP,TIFA,TI<br>GD2,TIMM10,TIMM4<br>4,TK1,TLCD4,TLE1,T<br>MBIM1,TMEM126A,T<br>MEM219,TMEM41A,T<br>MEM41B,TMEM51,T<br>MEM62,TMEM97,TN<br>FAIP2,TNFAIP8L1,TN<br>RC6A,TOP1MT,TPI1,<br>TPR,TPRG1L,TPRKB<br>,TRIB3,TRMT1,TSN,T<br>SPAN33,TSTA3,TTC<br>1,TTC19,TUBB,TUBB<br>6,TUBGCP2,TXN2,T<br>XNL1,UBAC1,UBE2F,<br>UBE2L3,UBR1,UBTF,<br>UBXN1,UBXN6,UCK1<br>,UGP2,UGT2B10,UL<br>K1,UNG,UPP2,UROC<br>1,UROD,USP47,UTP<br>14A,UTRN,UXS1,VP<br>S13A,WDR18,WDR2<br>6,WDR81,WIP1,WNT<br>5B,YPEL3,YWHAH,Z<br>CCHC24,ZFAND2B,Z<br>KSCAN1,ZNF23,ZNF<br>32,ZNF326,ZNF654<br>ABCB1,ABCB4,ABC<br>G2,ABCG5,ACAD8,A<br>CLY,ACOX2,ACSL3,<br>ACSL4,ACSM1,ACSS<br>2,AFG3L2,AGPAT2,A<br>HNAK,AKAP11,AKAP<br>9,ALAS1,ALDH1L1,A<br>LG13,ANKRD12,ARH<br>GAP18,ARHGAP21,A<br>RHGAP6,ARIH2,ARL<br>15,ASAP2,ATP1A1,A<br>TP6V1D,ATXN2L,AU<br>H,BAAT,BAP1,BDH1,<br>BIK,BRD8,C11orf54,<br>CA3,CAPN2,CARS1,<br>CBLB,CCDC66,CCT5<br>,CCT6A,CD2AP,CD4<br>7,CD99L2,CDA,CDH1<br>,CDH2,CDO1,CES1,<br>CGN,CHD6,CLDND1,<br>CLK2,CLMN,CMTM8,<br>CNOT4,CNOT6,CNP,<br>COL5A3,CPEB4,CPT<br>1A,CROT,CS,CSRNP<br>1,CTSH,CXADR,CYP<br>4F2,CYP7A1,CYTH1, | 348 |
|--------------------------------------------------|--------------|--------------|----------|--------|-------------------------------------------------------------------------------------------------------------------------------------------------------------------------------------------------------------------------------------------------------------------------------------------------------------------------------------------------------------------------------------------------------------------------------------------------------------------------------------------------------------------------------------------------------------------------------------------------------------------------------------------------------------------------------------------------------------------------------------------------------------------------------------------------------------------------------------------------------------------------------------------------------------------------------------------------------------------------------------------------------------------------------------------------------------------------------------------------------------------------------------------------------------------------------------------------------------------------------------------------------------------------------------------------------------|-----|

DAZAP1,DCTN1,DD  
C,DDX60,DGKZ,DHX  
9,DIAPH2,DICER1,DI  
O1,DIPK2A,DIXDC1,  
DMD,DOCK4,DPP4,D  
PP9,DSP,DSTN,DVL  
1,EFHD2,EGR1,EIF1  
AX,EIF4EBP1,ELF1,E  
NPP1,ERBB3,ESRRA  
,EXOC6,F11,F2R,F3,  
FAM160B1,FAM172A  
,FAM89A,FECH,FGA,  
FGFR2,FGFRL1,FGG  
,FH,FKBP4,FLCN,FO  
XK1,FOXO3,GDA,GN  
A12,GOLGB1,GPD2,  
GRHPR,GSDMD,GS  
K3A,GSTM2,GTF2A2  
,GTF2F1,GYG1,HEC  
A,HECTD3,HLF,HMG  
CR,HRAS,HSD3B7,H  
SPB1,ICK,ID2,IGFBP  
2,IL18,ING4,IRF6,IRS  
1,ITPA,JAK2,JMJD1C  
,KAT2B,KCMF1,KDM  
6A,KEAP1,KIAA0100,  
KLF9,KLHDC2,KTN1,  
KYNU,L2HGDH,LAR  
S2,LGALS4,LGR5,LI  
N7C,LITAF,LMNA,LPI  
N1,LRIG1,LRP12,LR  
RC28,LSM14B,LSS,L  
TBR,MACROH2A1,M  
AGED1,MAGI3,MBNL  
2,MCOLN1,MEF2A,M  
IA2,MKNK2,MLLT10,  
MLX,MMD,MOCOS,M  
ON2,MPDZ,MPRIP,M  
RPL44,MRPS22,MRP  
S25,MRPS27,MYO1B  
,MYO5B,MYO6,N4BP  
2,NAGK,NCOA1,NDU  
FA9,NEK7,NFKBIA,N  
HLRC2,NINJ1,NIPBL,  
NME1,NOSIP,NPC1,  
NR2F6,NR3C2,NR5A  
2,NRIP1,NUDT7,NUP  
62,NUP88,OAZ1,OSB  
PL1A,OTUD6B,OXR1  
,PALMD,PAN3,PCDH  
1,PCGF5,PDCD2,PD  
E2A,PDE9A,PDGFRB  
,PDLIM1,PDP2,PDPK  
1,PDRG1,PER1,PER  
3,PEX6,PGAP1,PHF2  
0L1,PHKA2,PIK3CA,  
PKHD1,PLD1,PLXNA  
2,PNRC1,POR,PPIF,  
PPP1R1B,PPP1R3B,  
PPP1R9A,PPP2R1A,  
PRPF6,PSEN2,PSMA  
6,PSMD1,PSMD2,PT

|                                                                                                                       |                           |                                |          |        |                                                                                                                                                                                                                                                                                                                                                                                                                                                                                                                                                                                                                                                                                                                                                 |     |
|-----------------------------------------------------------------------------------------------------------------------|---------------------------|--------------------------------|----------|--------|-------------------------------------------------------------------------------------------------------------------------------------------------------------------------------------------------------------------------------------------------------------------------------------------------------------------------------------------------------------------------------------------------------------------------------------------------------------------------------------------------------------------------------------------------------------------------------------------------------------------------------------------------------------------------------------------------------------------------------------------------|-----|
|                                                                                                                       |                           |                                |          |        | BP1,PTBP2,PXMP4, RAB11FIP2,RABEPK, RABGAP1L,RALGPS 2,RB1CC1,RBBP5,R BBP7,RCAN1,RCL1, REPIN1,RGS2,RHOD ,RICTOR,RNF144A,R OCK1,RPIA,SBF2,SC APER,SCARB2,SCYL 1,SDC4,SDR42E1,SE C63,SECISBP2L,SEN P6,SERPINA6,SERPI NE2,SESN3,SETDB2 ,SHPRH,SIRT5,SLC1 6A5,SLC1A4,SLC20A 1,SLC20A2,SLC25A3 2,SLC2A2,SLC2A5,S LC38A2,SLC39A10,S LC6A12,SLK,SMAP1, SNRNP200,SNX10,S OD2,SPARC,SPOP,S PTBN1,SPTBN2,ST3 GAL4,STARD7,STK2 4,STK40,STOM,STT3 B,STX8,STXBP3,SUL F2,SYNE1,TBC1D16, TBC1D20,TBC1D24, TEP1,TEX2,TIGD2,T K1,TLE1,TMEM126A, TNFAIP2,TNRC6A,T OP1MT,TPI1,TPR,TP RG1L,TRIB3,TRMT1, TSPAN33,TTC1,TUB B,TXNL1,UBAC1,UB E2F,UBR1,UGP2,UG T2B10,UROC1,URO D,USP47,UTRN,UXS 1,VPS13A,WIP12,WN T5B,YPEL3,ZCCHC2 4,ZFAND2B,ZKSCAN 1,ZNF23,ZNF32,ZNF 654 |     |
| Cancer,Cellular Development,Cellul ar Growth And Proliferation,Organis mal Injury And Abnormalities,Tumo r Morphology | Proliferation             | Proliferation Of Cancer Cells  | 1.18E-03 | -1.325 | ABCG2,AHCY,BIK,C DH1,DICER1,DOCK4 ,EGR1,EIF4EBP1,ER BB3,F2R,FOXO3,HM GCR,HRAS,ID2,IL18,I RS1,KITLG,LITAF,PD PK1,PLD1,RB1CC1,R CAN1,TLE1,ULK1                                                                                                                                                                                                                                                                                                                                                                                                                                                                                                                                                                                                    | 24  |
| Cell Cycle,Cell-To-Cell Signaling And Interaction,Cellular Growth And Proliferation                                   | Contact Growth Inhibition | Contact Growth Inhibition      | 8.28E-04 | -1.345 | ABCG2,CDH1,EGR1, ERBB3,FOXO3,HRA S,ING4,JAK2,NME1, PER1,PRKAR2A,RH OD,SMAD7,TIFA                                                                                                                                                                                                                                                                                                                                                                                                                                                                                                                                                                                                                                                                | 14  |
| Cancer,Organismal Injury And Abnormalities                                                                            | Development               | Development Of Malignant Tumor | 3.96E-11 | -1.356 | AASDH,ABCB1,ABC B4,ABCG5,ACAD8,A CLY,ACOX2,ACSL3, ACSL4,ACSM1,ACSS 2,ACTR6,AFG3L2,AG PAT2,AHNAK,AKAP1 1,AKAP9,ALAS1,ALD                                                                                                                                                                                                                                                                                                                                                                                                                                                                                                                                                                                                                         | 386 |



H1L1,ALG13,ANKRD  
12,ANP32A,ANXA7,A  
RHGAP21,ARHGAP6  
,ARIH2,ARL15,ARL6I  
P4,ASAP2,ASB13,AT  
G3,ATG4D,ATXN2L,  
AUH,BAAT,BAP1,BD  
H1,BHMT,BRD8,BUD  
23,C11orf54,C9orf152  
,CAPN2,CARS1,CBL  
B,CCDC66,CCT3,CC  
T5,CCT6A,CCT7,CD2  
AP,CD47,CD9,CD99L  
2,CDC14B,CDH1,CD  
H2,CDO1,CES1,CGN  
,CHCHD3,CHD6,CHP  
T1,CHRA1,CLDND1  
,CLK2,CLMN,CLOCK,  
CMTM6,CMTM8,CNO  
T4,CNOT6,CNP,COL  
27A1,COL5A3,CPEB  
4,CPT1A,CS,CTDSP  
1,CTPS2,CUL4B,CXA  
DR,CYLD,CYP4F2,C  
YP7A1,DAZAP1,DCT  
N1,DDX60,DEK,DGK  
Z,DHX9,DIAPH2,DIC  
ER1,DIO1,DIPK2A,DI  
XDC1,DMD,DMTF1,D  
OCK4,DPP4,DPP9,D  
SP,DSTN,DUSP19,E  
2F5,EGR1,EIF1AX,E  
LF1,ERBB3,ESRRA,  
EXOC6,EXTL2,F11,F  
2R,F3,FAM102A,FAM  
160B1,FAM172A,FEC  
H,FGA,FGB,FGFR2,F  
GG,FH,FLCN,FMO1,  
FMO5,FOXO3,FTSJ3  
,G6PD,GAS2L3,GNA  
12,GNG12,GOLGB1,  
GPD2,GRHPR,GSK3  
A,GSS,GSTM2,GTF2  
F1,GTF3C2,GYG1,H  
ECA,HECTD3,HERC  
4,HMGCR,HNRNPC,  
HRAS,HSPB1,ICK,ID  
2,IGFBP2,IL18,ING4,I  
RF6,IRS1,ITPA,JAK2,  
JMJD1C,KAT2B,KCM  
F1,KDM6A,KEAP1,KI  
AA0100,KITLG,KLF1  
2,KLHL7,KPNB1,KTN  
1,KYNU,L2HGDH,LG  
R5,LIN7A,LMNA,LRI  
G1,LRP12,LRRC28,L  
RRC3,LSM14B,LTBR  
,MAGED1,MAGI3,MA  
P2K3,MAP3K7,MBNL  
2,MCOLN1,MEF2A,M  
IA2,MKNK2,MLLT10,  
MLX,MOCOS,MON2,

MPDZ,MPP1,MPRI,  
MRNIP,MRPL44,MRP  
S22,MRPS27,MRPS9  
,MYO1B,MYO5B,MY  
O6,N4BP2L1,NCOA1,  
NDUFA9,NEK7,NET1  
,NFKBIA,NGEF,NHL  
RC2,NINJ1,NIPBL,N  
ME1,NOSIP,NPC1,N  
R1H4,NR2F6,NR3C2,  
NRIP1,NUDT1,NUDT  
19,NUDT7,NUP62,N  
UP88,OAZ1,OSBPL1  
A,OXR1,PALMD,PAN  
2,PAN3,PAQR9,PCD  
H1,PCGF5,PDCD2,P  
DE2A,PDE9A,PDGF  
C,PDGFRB,PDLIM1,  
PDP2,PDPK1,PER1,  
PER3,PFDN2,PGAP1  
,PHF20L1,PHKA2,PI  
K3AP1,PIK3CA,PKH  
D1,PLD1,PLXNA2,P  
MPCA,PNKD,PNRC1,  
POR,PPP1R14B,PPP  
1R1B,PPP1R9A,PPP  
2R1A,PRPF19,PRPF  
39,PRPF6,PSMD1,P  
SMD2,PSMD8,PTBP  
1,PTBP2,QDPR,RAB  
EPK,RABGAP1L,RAI  
14,RALGPS2,RASSF  
3,RB1CC1,RBBP5,R  
BBP7,RCL1,RHBDD1  
,RICTOR,ROCK1,RP  
A1,RPIA,RUFY3,SAA  
4,SARS1,SBF2,SCAP  
ER,SCARB2,SCYL1,  
SDC4,SEC63,SECIS  
BP2L,SENP6,SERPI  
NE2,SERPINH1,SES  
N3,SETDB2,SGTB,S  
HPRH,SLC1A4,SLC2  
0A1,SLC20A2,SLC2A  
2,SLC2A9,SLC35B3,  
SLC38A2,SLC39A10,  
SLC39A8,SLC6A12,S  
LC9A3R1,SMAD7,SM  
AP1,SNRNP200,SNT  
B1,SNX10,SNX9,SO  
AT2,SOD2,SPARC,S  
PON2,SPOP,SPTBN  
1,SPTBN2,STARD7,S  
TIP1,STK24,STK40,S  
TOM,STT3B,STX8,S  
TXBP3,SULF2,SYAP  
1,SYNE1,SYT1,TBC1  
D16,TBC1D20,TBC1  
D24,TBRG4,TCP1,TE  
P1,TEX2,TIGD2,TIM  
M44,TK1,TLCD4,TLE  
1,TMEM126A,TMEM4

|                                                                             |               |                           |          |        |                                                                                                                                                                                                                                                                         |     |
|-----------------------------------------------------------------------------|---------------|---------------------------|----------|--------|-------------------------------------------------------------------------------------------------------------------------------------------------------------------------------------------------------------------------------------------------------------------------|-----|
|                                                                             |               |                           |          |        | 1B,TMEM51,TMEM97,TNFAIP2,TNRC6A,TOP1MT,TPI1,TPR,TPRG1L,TRIB3,TTC1,TUBB,TUBB6,TXNL1,UBAC1,UBE2F,UBTF,UGP2,UGT2B10,ULK1,UNG,UROC1,UTP14A,UTRN,UXS1,VP S13A,WDR18,WDR26,WDR81,WIP1,WNT5B,ZCCHC24,ZFAND2B,ZKSCAN1,ZNF32                                                     |     |
| Carbohydrate Metabolism,Molecular Transport                                 | Transport     | Transport Of Carbohydrate | 1.45E-07 | -1.357 | ABCB1,ABCB4,DGKZ,ENPP1,ERBB3,GSK3A,IRS1,MAP2K3,MEF2A,NPC1,OGA,PDGFRB,PDPK1,PGAP1,PIK3CA,PPP1R3B,REPIN1,ROCK1,SLC2A2,SLC2A5,SLC2A9,SLC35A3,STXBP3,T                                                                                                                      | 24  |
| Lipid Metabolism,Small Molecule Biochemistry,Vitamin And Mineral Metabolism | Metabolism    | Steroid Metabolism        | 1.56E-05 | -1.362 | RIB3<br>ABCG5,ABCG8,ACAT2,ACLY,AKR1D1,BAT,CES1,CYP39A1,CYP7A1,ELOVL6,FECHE,G6PD,HMGCR,HS                                                                                                                                                                                | 25  |
| Cancer,Organismal Injury And Abnormalities,Reproductive System Disease      | Genital Tumor | Genital Tumor             | 9.74E-10 | -1.363 | D17B2,HSD3B7,KPNB1,LSS,NPC1,NR1H4,NR5A2,POR,RAN,SERPINA6,SOAT2,YWHAH<br>ABCB1,ABCB4,ABCG2,ABCG5,ACAD8,ACLY,ACOX2,ACSL3,ACSL4,ACSM1,ACSS2,AGPAT2,AHNAK,AKAP11,AKAP9,ALAS1,ALDH1L1,ALG13,ANKRD12,ARHGAP18,ARHGAP21,ARHGAP6,ARIH2,ARL15,ASP2,ATP1A1,ATP6V1D,ATXN2L,AUH,BAA | 331 |
|                                                                             |               |                           |          |        | T,BAP1,BDH1,BIK,BLMH,BRD8,CA3,CAPN2,CBLB,CCT5,CCT6A,CD2AP,CD47,CD99L2,CDA,CDH1,CDH2,CDO1,CES1,CGN,CHD6,CLDND1,CLMN,CLTM8,CNOT4,CNOT6,CNP,COL5A3,CPEB4,CPT1A,CS,CSRNP1,CTSH,CXADR,CYP4F2,CYP7A1,CYTH1,DAZAP1,DCTN1,DDX60,DGKZ,DHX9,DIA                                   |     |
|                                                                             |               |                           |          |        | APH2,DICER1,DIO1,DIPK2A,DIXDC1,DM                                                                                                                                                                                                                                       |     |
|                                                                             |               |                           |          |        | D,DOCK4,DPP4,DPP                                                                                                                                                                                                                                                        |     |

9,DSP,DSTN,DVL1,E  
FHD2,EGR1,EIF1AX,  
EIF4EBP1,ELF1,ENP  
P1,ERBB3,EXOC6,F1  
1,F2R,F3,FAM160B1,  
FAM172A,FAM89A,F  
ECH,FGA,FGFR2,FG  
FRL1,FGG,FH,FKBP  
4,FLCN,FOXK1,FOX  
O3,GDA,GNA12,GOL  
GB1,GPD2,GRHPR,  
GSDMD,GSK3A,GST  
M2,GTF2A2,GYG1,H  
ECA,HECTD3,HLF,H  
MGCR,HRAS,HSD3B  
7,HSPB1,ICK,ID2,IGF  
BP2,IL18,ING4,IRF6,I  
RS1,ITPA,JAK2,JMJ  
D1C,KAT2B,KCMF1,  
KDM6A,KEAP1,KIAA  
0100,KITLG,KLF9,KT  
N1,L2HGDH,LARS2,L  
GALS4,LGR5,LIN7C,  
LITAF,LMNA,LRIG1,L  
RP12,LRRC28,LSM1  
4B,LSS,LTBR,MACR  
OH2A1,MAGED1,MA  
GI3,MBNL2,MCOLN1  
,MEF2A,MIA2,MKNK  
2,MLLT10,MLX,MMD,  
MOCOS,MON2,MPD  
Z,MPRIP,MRPL44,M  
RPS22,MRPS25,MR  
PS27,MYO1B,MYO5  
B,MYO6,N4BP2,NCO  
A1,NDUFA9,NEK7,N  
FKBIA,NHLRC2,NIPB  
L,NME1,NOSIP,NPC  
1,NR2F6,NR3C2,NR5  
A2,NRIP1,NUDT7,NU  
P62,NUP88,OAZ1,OS  
BPL1A,OTUD6B,OXR  
1,PALMD,PAN3,PCD  
H1,PCGF5,PDCD2,P  
DE2A,PDGFRB,PDLI  
M1,PDP2,PDPK1,PE  
R1,PER3,PEX6,PGA  
P1,PHF20L1,PHKA2,  
PIK3CA,PKHD1,PLD  
1,PLXNA2,PNRC1,P  
OR,PPIF,PPP1R1B,P  
PP1R3B,PPP1R9A,P  
PP2R1A,PRPF6,PSE  
N2,PSMA6,PSMD1,P  
SMD2,PTBP1,PTBP2  
,PXMP4,RAB11FIP2,  
RABEPK,RABGAP1L,  
RALGPS2,RB1CC1,R  
BBP5,RBBP7,RCAN1  
,RCL1,REPIN1,RGS2  
,RHOD,RICTOR,RNF  
144A,ROCK1,RPIA,S

|                                                  |               |                                            |          |        |                                                                                                                                                                                                                                                                                                                                                                                                                                                                                                                                                                                                                                                                                         |     |
|--------------------------------------------------|---------------|--------------------------------------------|----------|--------|-----------------------------------------------------------------------------------------------------------------------------------------------------------------------------------------------------------------------------------------------------------------------------------------------------------------------------------------------------------------------------------------------------------------------------------------------------------------------------------------------------------------------------------------------------------------------------------------------------------------------------------------------------------------------------------------|-----|
|                                                  |               |                                            |          |        | BF2,SCAPER,SCAR<br>B2,SCYL1,SDC4,SD<br>R42E1,SECISBP2L,S<br>ERPINA6,SERPINE2,<br>SESN3,SETDB2,SIR<br>T5,SLC16A5,SLC1A4<br>,SLC20A1,SLC20A2,<br>SLC25A32,SLC2A2,S<br>LC2A5,SLC38A2,SLC<br>39A10,SLC6A12,SLK,<br>SMAP1,SNRNP200,S<br>NX10,SOD2,SPARC,<br>SPOP,SPTBN1,SPTB<br>N2,ST3GAL4,STARD<br>7,STK24,STK40,STO<br>M,STT3B,STX8,STXB<br>P3,SULF2,SYNE1,TB<br>C1D16,TBC1D20,TB<br>C1D24,TEP1,TEX2,TI<br>FA,TIGD2,TK1,TLE1,<br>TMEM126A,TNFAIP2<br>,TNRC6A,TOP1MT,T<br>PI1,TPR,TPRG1L,TRI<br>B3,TRMT1,TSPAN33,<br>TTC1,TUBB,TXNL1,U<br>BAC1,UBE2F,UBR1,<br>UGP2,UGT2B10,UR<br>OC1,UROD,USP47,U<br>TRN,UXS1,VPS13A,<br>WNT5B,YPEL3,ZCC<br>HC24,ZFAND2B,ZKS<br>CAN1,ZNF23,ZNF32,<br>ZNF654 |     |
| Cancer,Organismal<br>Injury And<br>Abnormalities | Tumorigenesis | Tumorigenesis<br>Of Epithelial<br>Neoplasm | 4,60E-13 | -1,377 | AASDH,ABCB1,ABC<br>B4,ABCG2,ABCG5,A<br>CAD8,ACLY,ACOX2,<br>ACSL3,ACSL4,ACSM<br>1,ACSS2,ACTR6,AF<br>G3L2,AGPAT2,AHNA<br>K,AKAP11,AKAP9,AL<br>AS1,ALDH1L1,ALG13<br>,ANKRD12,ANP32A,<br>ANXA7,ARHGAP21,A<br>RHGAP6,ARIH2,ARL<br>15,ARL6IP4,ASAP2,A<br>SB13,ATG3,ATG4D,A<br>TP1A1,ATXN2L,AUH,<br>BAAT,BAP1,BDH1,B<br>HMT,BID,BRD8,BUD<br>23,C11orf54,C9orf152<br>,C9orf16,CAPN2,CAR<br>S1,CBLB,CCDC66,C<br>CT3,CCT5,CCT6A,C<br>CT7,CD2AP,CD47,C<br>D9,CD99L2,CDC14B,<br>CDH1,CDH2,CDO1,C<br>EBPD,CES1,CGN,CH<br>CHD3,CHD6,CHPT1,<br>CHRAC1,CLDND1,C<br>LK2,CLMN,CLOCK,C<br>MTM6,CMTM8,CNOT<br>4,CNOT6,CNP,COL2                                                                              | 394 |

7A1, COL5A3, CPEB4,  
CPT1A, CS, CTDSP1,  
CTPS2, CUL4B, CXAD  
R, CYLD, CYP4F2, CY  
P7A1, DAZAP1, DCTN  
1, DDX60, DEK, DGKZ,  
DHX9, DIAPH2, DICE  
R1, DIO1, DIPK2A, DIX  
DC1, DMD, DMTF1, D  
OCK4, DPP4, DPP9, D  
SP, DSTN, DUSP19, E  
2F5, EGR1, EIF1AX, EI  
F4EBP1, ELF1, ERBB  
3, ESRRA, EXOC6, EX  
TL2, F11, F2R, F3, FAM  
102A, FAM160B1, FA  
M172A, FECH, FGA, F  
GB, FGFR2, FGG, FH,  
FLCN, FMO1, FMO5, F  
OXO3, FTSJ3, G6PD,  
GAS2L3, GNA12, GNG  
12, GOLGB1, GPD2, G  
RHRP, GSK3A, GSS, G  
STM2, GTF2F1, GTF3  
C2, GYG1, HECA, HEC  
TD3, HERC4, HMGCR,  
HNRNPC, HRAS, HSP  
B1, ICK, ID4, IGFBP2, I  
L18, ING4, IRF6, IRS1, I  
TPA, JAK2, JMJD1C, K  
AT2B, KCMF1, KDM6A  
, KEAP1, KIAA0100, KI  
TLG, KLF12, KLHL7, K  
PNB1, KTN1, KYNU, L2  
HGDH, LGR5, LIN7A, L  
MNA, LRIG1, LRP12, L  
RRC28, LRRC3, LSM1  
4B, LTBR, MAGED1, M  
AGI3, MAP2K3, MAP3  
K7, MBNL2, MCOLN1,  
MEF2A, MIA2, MKNK2  
, MLLT10, MLX, MOCO  
S, MON2, MPDZ, MPP  
1, MPRIIP, MRNIP, MR  
PL44, MRPS22, MRPS  
27, MRPS9, MYO1B, M  
YO5B, MYO6, N4BP2L  
1, NCOA1, NDUFA9, N  
EK7, NET1, NFKBIA, N  
GEF, NHLRC2, NIPBL,  
NME1, NOSIP, NPC1,  
NR1H4, NR2F6, NR3C  
2, NR5A2, NRIP1, NUD  
T1, NUDT19, NUDT7,  
NUP62, NUP88, OAZ1,  
OSBPL1A, OXR1, PAL  
MD, PAN2, PAN3, PAQ  
R9, PCDH1, PCGF5, P  
DCD2, PDE2A, PDE9A  
, PDGFC, PDGFRB, PD  
LIM1, PDP2, PDPK1, P  
ER1, PER3, PFDN2, P

|                                                                              |          |                        |          |        |                                                                                                                                                                                                                                                                                                                                                                                                                                                                                                                                                                                                                                                                                                                                                                                                                                                                                                                                                                                                                                                                                                                                                                                                                                                                                                        |    |
|------------------------------------------------------------------------------|----------|------------------------|----------|--------|--------------------------------------------------------------------------------------------------------------------------------------------------------------------------------------------------------------------------------------------------------------------------------------------------------------------------------------------------------------------------------------------------------------------------------------------------------------------------------------------------------------------------------------------------------------------------------------------------------------------------------------------------------------------------------------------------------------------------------------------------------------------------------------------------------------------------------------------------------------------------------------------------------------------------------------------------------------------------------------------------------------------------------------------------------------------------------------------------------------------------------------------------------------------------------------------------------------------------------------------------------------------------------------------------------|----|
| Lipid<br>Metabolism,Molecular<br>Transport,Small<br>Molecule<br>Biochemistry | Quantity | Quantity Of<br>Steroid | 1.05E-03 | -1.391 | GAP1,PHF20L1,PHK<br>A2,PIK3AP1,PIK3CA,<br>PKHD1,PLD1,PLXNA<br>2,PMPCA,PNKD,PNR<br>C1,POR,PPP1R14B,<br>PPP1R1B,PPP1R9A,<br>PPP2R1A,PRDX6,PR<br>PF19,PRPF39,PRPF<br>6,PSMD1,PSMD2,PS<br>MD8,PTBP1,PTBP2,<br>QDPR,RABEPK,RAB<br>GAP1L,RAI14,RALG<br>PS2,RASSF3,RB1CC<br>1,RBBP5,RBBP7,RC<br>L1,RHBDD1,RICTOR,<br>ROCK1,RPA1,RPIA,<br>RUFY3,SAA4,SARS1<br>,SBF2,SCAPER,SCA<br>RB2,SCYL1,SDC4,S<br>EC63,SECISBP2L,SE<br>NP6,SERPINE2,SER<br>PINH1,SESN3,SETD<br>B2,SGTB,SHPRH,SL<br>C1A4,SLC20A1,SLC2<br>0A2,SLC2A2,SLC2A9<br>,SLC30A10,SLC35B3<br>,SLC38A2,SLC39A10<br>,SLC39A8,SLC6A12,<br>SLC9A3R1,SMAD7,S<br>MAP1,SNRNP200,SN<br>TB1,SNX10,SNX9,SO<br>AT2,SOD2,SPARC,S<br>PON2,SPOP,SPTBN<br>1,SPTBN2,STARD7,S<br>TIP1,STK24,STK40,S<br>TOM,STT3B,STX8,S<br>TXBP3,SULF2,SYAP<br>1,SYNE1,SYT1,TBC1<br>D16,TBC1D20,TBC1<br>D24,TBRG4,TCP1,TE<br>P1,TEX2,TIGD2,TIM<br>M44,TK1,TLCD4,TLE<br>1,TMEM126A,TMEM4<br>1B,TMEM51,TMEM97<br>,TNFAIP2,TNRC6A,T<br>OP1MT,TPI1,TPR,TP<br>RG1L,TRIB3,TTC1,T<br>UBB,TUBB6,TXNL1,<br>UBAC1,UBE2F,UBTF<br>,UGP2,UGT2B10,UL<br>K1,UNG,UROC1,UTP<br>14A,UTRN,UXS1,VP<br>S13A,WDR18,WDR2<br>6,WDR81,WIPI2,WNT<br>5B,ZCCHC24,ZFAND<br>2B,ZKSCAN1,ZNF32<br>ABCB1,ABCB4,ABC<br>G5,ABCG8,ACAT2,A<br>GPAT2,ATP1A1,BHM<br>T,CES1,CLOCK,CYP<br>7A1,DICER1,DIO1,E<br>GR1,FKBP4,FMO5,F | 33 |
|------------------------------------------------------------------------------|----------|------------------------|----------|--------|--------------------------------------------------------------------------------------------------------------------------------------------------------------------------------------------------------------------------------------------------------------------------------------------------------------------------------------------------------------------------------------------------------------------------------------------------------------------------------------------------------------------------------------------------------------------------------------------------------------------------------------------------------------------------------------------------------------------------------------------------------------------------------------------------------------------------------------------------------------------------------------------------------------------------------------------------------------------------------------------------------------------------------------------------------------------------------------------------------------------------------------------------------------------------------------------------------------------------------------------------------------------------------------------------------|----|

|                                             |           |                    |          |        |                                                                                                                                                                                                                                                                                                                                                                                                                                                                                                                                                                                                                                                                                                                                                                                                                                                                                                                                                                                                                                                                                                                                                                                                                    |     |
|---------------------------------------------|-----------|--------------------|----------|--------|--------------------------------------------------------------------------------------------------------------------------------------------------------------------------------------------------------------------------------------------------------------------------------------------------------------------------------------------------------------------------------------------------------------------------------------------------------------------------------------------------------------------------------------------------------------------------------------------------------------------------------------------------------------------------------------------------------------------------------------------------------------------------------------------------------------------------------------------------------------------------------------------------------------------------------------------------------------------------------------------------------------------------------------------------------------------------------------------------------------------------------------------------------------------------------------------------------------------|-----|
| Cancer, Organismal Injury And Abnormalities | Frequency | Frequency Of Tumor | 1.38E-12 | -1.393 | OXO3, GPD2, GSK3A, HMGCR, IL18, IRS1, LGR5, NCOA1, NPC1, NR1H4, NR5A2, POR, PSEN2, SERPINA6, SLCO3A3R1, SOAT2, STAR, RD4<br>AASDH, ABCB1, ABCB4, ABCG2, ABCG5, ABCAD8, ACLY, ACOX2, ACSL3, ACSL4, ACSM1, ACSS2, ACTR6, AFG3L2, AGPAT2, AHNAK, AKAP11, AKAP9, ALAS1, ALDH1L1, ALG13, ANKRD12, ANP32A, ANXA7, ARHGAP21, ARHGAP6, ARIH2, ARL15, ARL6IP4, ASAP2, ASB13, ATG3, ATG4D, ATP1A1, ATXN2L, AUH, BAAT, BAP1, BDH1, BHMT, BID, BRD8, BUD23, C11orf54, C9orf152, C9orf16, CAPN2, CARP1, CBLB, CCDC66, CCT3, CCT5, CCT6A, CCT7, CD2AP, CD47, CD9, CD99L2, CDC14B, CDH1, CDH2, CDO1, CEBPD, CES1, CGN, CHCHD3, CHD6, CHPT1, CHRA1, CLDN1, CLK2, CLMN, CLOCK, CMTM6, CMTM8, CNOT4, CNOT6, CNP, COL27A1, COL5A3, CPEB4, CPT1A, CS, CTDSP1, CTPS2, CUL4B, CXADR, CYLD, CYP4F2, CYP7A1, DAZAP1, DCTN1, DDX60, DEK, DGKZ, DHX9, DIAPH2, DICK1, DIO1, DIPK2A, DIXDC1, DMD, DMTF1, DOK4, DPP4, DPP9, DSP, DSTN, DUSP19, EIF2F5, EGR1, EIF1AX, EIF4EBP1, ELF1, ERBB3, ESRRA, EXOC6, EXT2, F11, F2R, F3, FAM102A, FAM160B1, FAM172A, FECH, FGA, FGB, FGFR2, FGG, FH, FLCN, FMO1, FMO5, FOXO3, FTSJ3, G6PD, GAS2L3, GNA12, GNG12, GOLGB1, GPD2, GRHPR, GSK3A, GSS, GSTM2, GTF2F1, GTF3C2, GYG1, HECA, HECTD3, HERC4, HMGCR, | 397 |
|---------------------------------------------|-----------|--------------------|----------|--------|--------------------------------------------------------------------------------------------------------------------------------------------------------------------------------------------------------------------------------------------------------------------------------------------------------------------------------------------------------------------------------------------------------------------------------------------------------------------------------------------------------------------------------------------------------------------------------------------------------------------------------------------------------------------------------------------------------------------------------------------------------------------------------------------------------------------------------------------------------------------------------------------------------------------------------------------------------------------------------------------------------------------------------------------------------------------------------------------------------------------------------------------------------------------------------------------------------------------|-----|



HNRNPC,HRAS,HSP  
B1,ICK,ID2,ID4,IGFB  
P2,IL18,ING4,IRF6,IR  
S1,ITPA,JAK2,JMJD1  
C,KAT2B,KCMF1,KD  
M6A,KEAP1,KIAA010  
0,KITLG,KLF12,KLHL  
7,KPNB1,KTN1,KYN  
U,L2HGDH,LGR5,LIN  
7A,LMNA,LRIG1,LRP  
12,LRRC28,LRRC3,L  
SM14B,LTBR,MAGE  
D1,MAGI3,MAP2K3,  
MAP3K7,MBNL2,MC  
OLN1,MEF2A,MIA2,  
MKNK2,MLLT10,MLX  
,MOCOS,MON2,MPD  
Z,MPP1,MPRIIP,MRNI  
P,MRPL44,MRPS22,  
MRPS27,MRPS9,MY  
O1B,MYO5B,MYO6,N  
4BP2L1,NCOA1,NDU  
FA9,NEK7,NET1,NFK  
BIA,NGEF,NHLRC2,  
NINJ1,NIPBL,NME1,  
NOSIP,NPC1,NR1H4,  
NR2F6,NR3C2,NR5A  
2,NRIP1,NUDT1,NUD  
T19,NUDT7,NUP62,N  
UP88,OAZ1,OSBPL1  
A,OXR1,PALMD,PAN  
2,PAN3,PAQR9,PCD  
H1,PCGF5,PDCD2,P  
DE2A,PDE9A,PDGF  
C,PDGFRB,PDLIM1,  
PDP2,PDPK1,PER1,  
PER3,PFDN2,PGAP1  
,PHF20L1,PHKA2,PI  
K3AP1,PIK3CA,PKH  
D1,PLD1,PLXNA2,P  
MPCA,PNKD,PNRC1,  
POR,PPP1R12A,PPP  
1R14B,PPP1R1B,PP  
P1R9A,PPP2R1A,PR  
DX6,PRPF19,PRPF3  
9,PRPF6,PSMD1,PS  
MD2,PSMD8,PTBP1,  
PTBP2,QDPR,RABE  
PK,RABGAP1L,RAI1  
4,RALGPS2,RASSF3,  
RB1CC1,RBBP5,RBB  
P7,RCL1,RHBDD1,RI  
CTOR,ROCK1,RPA1,  
RPIA,RUFY3,SAA4,S  
ARS1,SBF2,SCAPER  
,SCARB2,SCYL1,SD  
C4,SEC63,SECISBP2  
L,SEN6,SERPINE2,  
SERPINH1,SESN3,S  
ETDB2,SGTB,SHPR  
H,SLC1A4,SLC20A1,  
SLC20A2,SLC2A2,SL

|                                            |           |           |          |        |                                                                                                                                                                                                                                                                                                                                                                                                                                                                                                                                              |     |
|--------------------------------------------|-----------|-----------|----------|--------|----------------------------------------------------------------------------------------------------------------------------------------------------------------------------------------------------------------------------------------------------------------------------------------------------------------------------------------------------------------------------------------------------------------------------------------------------------------------------------------------------------------------------------------------|-----|
|                                            |           |           |          |        | C2A9,SLC30A10,SLC35B3,SLC38A2,SLC39A10,SLC39A8,SLC6A12,SLC9A3R1,SMA D7,SMAP1,SNRNP200,SNTB1,SNX10,SNX9,SOAT2,SOD2,SPARC,SPON2,SPOP,SP TBN1,SPTBN2,STAR D7,STIP1,STK24,STK40,STOM,STT3B,STX8,STXBP3,SULF2,SYAP1,SYNE1,SYT1,TB C1D16,TBC1D20,TB C1D24,TBRG4,TCP1,TEP1,TEX2,TIGD2,TI MM44,TK1,TLCD4,TL E1,TMEM126A,TME M41B,TMEM51,TME M97,TNFAIP2,TNRC 6A,TP1MT,TPI1,TP R,TPRG1L,TRIB3,TT C1,TUBB,TUBB6,TX NL1,UBAC1,UBE2F,UBTF,UGP2,UGT2B10,ULK1,UNG,UROC1,UTP14A,UTRN,UXS1,VPS13A,WDR18,WDR26,WDR81,WIP1,WNT5B,ZCCHC24,ZFAND2B,ZKSCAN1,ZNF32 |     |
| Cancer,Organismal Injury And Abnormalities | Carcinoma | Carcinoma | 2.49E-28 | -1.432 | AASDH,ABCB1,ABCB4,ABCG2,ABCG5,ABCG8,ABTB2,ACAD8,ACAT2,ACLY,ACOX2,ACSL3,ACSL4,ACSL5,ACSM1,ACSM5,ACSS2,ACTR6,ADH4,AFG3L2,AGPAT2,AHCY,AHNAK,AHSA1,AKAP11,AKAP9,AKR1D1,ALAS1,ALDH1L1,ALG13,AMDHD1,ANKRD12,ANP32A,ANXA7,ARF3,ARGLU1,ARRHGAP18,ARRHGAP21,ARRHGAP6,ARRIH2,ARRL15,ARRL4A,ARRL6IP4,ARSG,ASAP2,ASB13,ATG3,ATG4D,ATP1A1,ATP1B1,ATP6V1D,ATXN2L,AUH,BAA T,BAP1,BDH1,BHMT,BHMT2,BID,BIK,BLMH,BRD8,BUD23,C11orf54,C9orf152,C9orf16,CA3,CAMKK2,CAPN2,CARS1,CBLB,CCEBE1,CCDC66,CCT3,CCT4,CCT5,CCT6A,CCT7,CD2AP,CD47,                          | 582 |

CD9,CD99L2,CDA,C  
DC14B,CDH1,CDH2,  
CDO1,CEBPD,CENP  
V,CES1,CGN,CHCH  
D3,CHCHD4,CHD6,C  
HPT1,CHRA1,CIB3,  
CITED2,CLDND1,CL  
K2,CLMN,CLOCK,CM  
TM6,CMTM8,CNN3,C  
NOT4,CNOT6,CNP,C  
OL27A1,COL5A3,CO  
RO1B,CPEB4,CPT1A  
,CRIP2,CRLS1,CROT  
,CS,CSRNP1,CTDSP  
1,CTPS2,CTSH,CUL4  
B,CXADR,CYB5B,CY  
LD,CYP2U1,CYP39A  
1,CYP4F2,CYP7A1,C  
YTH1,DAZAP1,DCTN  
1,DDC,DDX60,DEK,D  
GKZ,DHX9,DIAPH2,D  
ICER1,DIO1,DIPK2A,  
DIXDC1,DMD,DMTF1  
,DNAJB1,DNAJC5,D  
OCK4,DPP4,DPP9,D  
SP,DSTN,DTYMK,DU  
SP19,DVL1,E2F5,EC  
HDC1,EEPD1,EFHD2  
,EGR1,EIF1AX,EIF4E  
BP1,ELF1,ENDOG,E  
NPP1,ERBB3,ESRRA  
,EXOC6,EXOSC2,EX  
TL2,F11,F2R,F3,FAD  
S2,FAM102A,FAM11  
8B,FAM160B1,FAM1  
72A,FAM76B,FAM89  
A,FBXO31,FBXO9,FE  
CH,FGA,FGB,FGFR2  
,FGFRL1,FGG,FH,FK  
BP4,FLCN,FMO1,FM  
O5,FOXK1,FOXO3,F  
PGS,FTSJ3,G6PD,G  
AS2L3,GCAT,GCLC,  
GCNT2,GDA,GNA12,  
GNG12,GOLGB1,GP  
D2,GPN1,GRHPR,GS  
DMD,GSK3A,GSS,G  
STM2,GTF2A2,GTF2  
F1,GTF3C2,GYG1,H  
ECA,HECTD3,HERC  
4,HLF,HMG20B,HMG  
CR,HNRNPC,HNRNP  
D,HOMER2,HOK1,  
HRAS,HSD17B2,HSD  
3B7,HSPB1,ICK,ID2,I  
D4,IGFBP2,IL18,ING  
4,IRF6,IRS1,ITPA,ITP  
K1,JAK2,JMJD1C,KA  
T2B,KCMF1,KDM6A,  
KEAP1,KHK,KIAA010  
0,KITLG,KLF12,KLF9,  
KLHDC2,KLHL21,KL

HL7,KPNB1,KTN1,KY  
NU,L2HGDH,LARS2,  
LGALS4,LGR5,LIN7A  
,LIN7C,LITAF,LMNA,  
LPIN1,LRIG1,LRP12,  
LRRC28,LRRC3,LSM  
14B,LSS,LTBR,MAC  
ROH2A1,MAGED1,M  
AGI3,MAP1LC3B,MA  
P2K3,MAP3K7,MBNL  
2,MCOLN1,MEF2A,M  
IA2,MKNK2,MLLT10,  
MLX,MMD,MOCOS,M  
ON2,MPDZ,MPP1,M  
PRIP,MRNIP,MRPL1  
2,MRPL20,MRPL24,  
MRPL44,MRPS22,M  
RPS25,MRPS27,MR  
PS9,MT1F,MYO1B,M  
YO5B,MYO6,N4BP2,  
N4BP2L1,NAGK,NCA  
LD,NCOA1,NDUFA12  
,NDUFA9,NDUFB9,N  
EK7,NET1,NFKBIA,N  
GEF,NHLRC2,NINJ1,  
NIPBL,NME1,NOSIP,  
NPC1,NR1H4,NR2F6  
,NR3C2,NR5A2,NRIP  
1,NT5C,NUDT1,NUD  
T19,NUDT7,NUP62,N  
UP88,NUS1,OAZ1,O  
SBPL1A,OTUD6B,OX  
R1,PALMD,PAN2,PA  
N3,PAQR9,PCDH1,P  
CGF5,PDCD2,PDE2A  
,PDE9A,PDGFC,PDG  
FRB,PDLIM1,PDP2,P  
DPK1,PDRG1,PER1,  
PER3,PES1,PEX26,P  
EX6,PFDN2,PFKFB1,  
PGAP1,PHF20L1,PH  
KA2,PIK3AP1,PIK3C  
A,PKHD1,PLD1,PLX  
NA2,PMPCA,PNKD,P  
NRC1,POR,PPIF,PP  
M1A,PPOX,PPP1R12  
A,PPP1R14B,PPP1R  
1B,PPP1R3B,PPP1R  
9A,PPP2R1A,PRDX6,  
PRPF19,PRPF39,PR  
PF6,PRPS1,PRPS2,P  
SEN2,PSMA6,PSMD  
1,PSMD11,PSMD2,P  
SMD8,PSME2,PSMG  
1,PSPC1,PSPH,PTB  
P1,PTBP2,PXMP4,Q  
DPR,RAB11FIP2,RA  
B1B,RABEPK,RABG  
AP1L,RAI14,RALGPS  
2,RAN,RASA3,RASS  
F3,RB1CC1,RBBP5,  
RBBP7,RBKS,RCAN

1,RCL1,REPIN1,RGS  
2,RHBDD1,RHOD,RI  
CTOR,RNF14,RNF14  
4A,RNF167,ROCK1,  
RPA1,RPIA,RUFY3,S  
AA4,SAR1B,SARS1,  
SBF2,SCAPER,SCA  
RB2,SCYL1,SDC4,S  
DR42E1,SEC63,SECI  
SBP2L,SENP6,SERP  
INA6,SERPINE2,SER  
PINH1,SESN3,SETD  
B2,SFRP5,SGK2,SG  
TB,SH3D19,SHMT1,  
SHPRH,SIRT5,SLC1  
0A1,SLC16A5,SLC1A  
4,SLC20A1,SLC20A2  
,SLC25A32,SLC27A2  
,SLC2A2,SLC2A5,SL  
C2A9,SLC35A3,SLC3  
5B1,SLC35B3,SLC38  
A2,SLC39A10,SLC39  
A8,SLC6A12,SLC9A3  
R1,SLK,SMAD7,SMA  
P1,SNAPC2,SNRNP2  
00,SNTB1,SNX10,SN  
X5,SNX9,SOAT2,SO  
D2,SPARC,SPG21,S  
PON2,SPOP,SPTBN  
1,SPTBN2,ST3GAL4,  
STARD7,STIP1,STK2  
4,STK40,STOM,STT3  
B,STX18,STX8,STXB  
P3,SULF2,SUMF1,SY  
AP1,SYNE1,SYT1,TB  
C1D16,TBC1D20,TB  
C1D24,TBRG4,TCIM,  
TCP1,TEP1,TEX2,TH  
AP4,THRSP,TIFA,TI  
GD2,TIMM10,TIMM4  
4,TK1,TLCD4,TLE1,T  
MBIM1,TMEM126A,T  
MEM219,TMEM41A,T  
MEM41B,TMEM51,T  
MEM62,TMEM97,TN  
FAIP2,TNFAIP8L1,TN  
RC6A,TOP1MT,TPI1,  
TPR,TPRG1L,TPRKB  
,TRIB3,TRMT1,TSN,T  
SPAN33,TSTA3,TTC  
1,TTC19,TUBB,TUBB  
6,TUBGCP2,TXN2,T  
XNL1,UBAC1,UBE2F,  
UBE2L3,UBR1,UBTF,  
UBXN1,UBXN6,UCK1  
,UGP2,UGT2B10,UL  
K1,UNG,UPP2,UROC  
1,UROD,USP47,UTP  
14A,UTRN,UXS1,VP  
S13A,WDR18,WDR2  
6,WDR81,WIP1,WNT  
5B,YPEL3,YWHAH,Z

|                                                                        |                       |                       |          |        |                                                                                                                                                                                                                                                                                                                                                                                                                                                                                                                                                                                                                                                                                                                                                                                                                                                                                                                                                                                                                                                                                                                                                                                                                                                                                                       |     |
|------------------------------------------------------------------------|-----------------------|-----------------------|----------|--------|-------------------------------------------------------------------------------------------------------------------------------------------------------------------------------------------------------------------------------------------------------------------------------------------------------------------------------------------------------------------------------------------------------------------------------------------------------------------------------------------------------------------------------------------------------------------------------------------------------------------------------------------------------------------------------------------------------------------------------------------------------------------------------------------------------------------------------------------------------------------------------------------------------------------------------------------------------------------------------------------------------------------------------------------------------------------------------------------------------------------------------------------------------------------------------------------------------------------------------------------------------------------------------------------------------|-----|
| Cancer,Organismal Injury And Abnormalities,Reproductive System Disease | Male Genital Neoplasm | Male Genital Neoplasm | 1.13E-06 | -1.432 | CCHC24,ZFAND2B,Z<br>KSCAN1,ZNF23,ZNF<br>32,ZNF326,ZNF654<br>ABCB1,ABCB4,ABC<br>G2,ACAD8,ACLY,AC<br>OX2,ACSL3,ACSL4,A<br>CSM1,ACSS2,AGPA<br>T2,AHNAK,AKAP11,A<br>LDH1L1,ALG13,ANK<br>RD12,ARHGAP18,AR<br>HGAP6,ARIH2,ASAP<br>2,ATP1A1,ATP6V1D,<br>ATXN2L,BAAT,BAP1,<br>BDH1,BLMH,BRD8,C<br>A3,CBLB,CD2AP,CD<br>H1,CDH2,CDO1,CES<br>1,CGN,CHD6,CLDND<br>1,CNOT4,CNOT6,CN<br>P,COL5A3,CPT1A,C<br>SRNP1,CYP7A1,CYT<br>H1,DCTN1,DDX60,D<br>GKZ,DICER1,DMD,D<br>OCK4,DSP,EFHD2,E<br>GR1,EIF1AX,EIF4EB<br>P1,ERBB3,F11,FAM1<br>60B1,FAM89A,FGA,F<br>GFR2,FGFRL1,FH,F<br>KBP4,FLCN,FOXK1,F<br>OXO3,GDA,GNA12,G<br>OLGB1,GPD2,GSDM<br>D,GTF2A2,HLF,HMG<br>CR,HRAS,HSD3B7,H<br>SPB1,ID2,IGFBP2,IN<br>G4,IRS1,JAK2,JMJD1<br>C,KDM6A,KIAA0100,<br>KITLG,KTN1,LARS2,<br>LGALS4,LGR5,LIN7C<br>,LITAF,LRIG1,LRP12,<br>LRRC28,LSS,LTBR,<br>MACROH2A1,MAGI3,<br>MBNL2,MIA2,MKNK2<br>,MLLT10,MMD,MOC<br>OS,MON2,MPDZ,MP<br>RIP,MRPS25,MYO5B<br>,MYO6,N4BP2,NCOA<br>1,NFKBIA,NIPBL,NM<br>E1,NRIP1,NUDT7,NU<br>P88,OAZ1,OTUD6B,<br>PAN3,PCDH1,PDGF<br>RB,PDP2,PDPK1,PE<br>R1,PEX6,PIK3CA,PK<br>HD1,PLD1,PLXNA2,P<br>OR,PPIF,PPP1R1B,P<br>PP1R3B,PPP1R9A,P<br>PP2R1A,PRPF6,PSE<br>N2,PSMD1,PSMD2,P<br>XMP4,RAB11FIP2,R<br>ALGPS2,RCAN1,RCL<br>1,REPIN1,RHOD,RN<br>F144A,ROCK1,SBF2,<br>SCAPER,SCARB2,S<br>CYL1,SDC4,SDR42E | 203 |
|------------------------------------------------------------------------|-----------------------|-----------------------|----------|--------|-------------------------------------------------------------------------------------------------------------------------------------------------------------------------------------------------------------------------------------------------------------------------------------------------------------------------------------------------------------------------------------------------------------------------------------------------------------------------------------------------------------------------------------------------------------------------------------------------------------------------------------------------------------------------------------------------------------------------------------------------------------------------------------------------------------------------------------------------------------------------------------------------------------------------------------------------------------------------------------------------------------------------------------------------------------------------------------------------------------------------------------------------------------------------------------------------------------------------------------------------------------------------------------------------------|-----|

|                                                  |                                   |                                   |          |        |                                                                                                                                                                                                                                                                                                                                                                                                                                                                                                                                                                                                                                                                                                                                                                                                                                                                                                                           |     |
|--------------------------------------------------|-----------------------------------|-----------------------------------|----------|--------|---------------------------------------------------------------------------------------------------------------------------------------------------------------------------------------------------------------------------------------------------------------------------------------------------------------------------------------------------------------------------------------------------------------------------------------------------------------------------------------------------------------------------------------------------------------------------------------------------------------------------------------------------------------------------------------------------------------------------------------------------------------------------------------------------------------------------------------------------------------------------------------------------------------------------|-----|
|                                                  |                                   |                                   |          |        | 1,SECISBP2L,SERPI<br>NA6,SERPINE2,SES<br>N3,SIRT5,SLC16A5,S<br>LC1A4,SLC25A32,SL<br>C39A10,SLC6A12,SL<br>K,SMAP1,SNRNP200<br>,SPARC,SPOP,SPTB<br>N1,SPTBN2,ST3GAL<br>4,STOM,STX8,STXB<br>P3,SULF2,SYNE1,TB<br>C1D16,TBC1D24,TIF<br>A,TK1,TNFAIP2,TNR<br>C6A,TOP1MT,TPR,T<br>RMT1,TSPAN33,UBA<br>C1,UBE2F,UBR1,UR<br>OC1,USP47,UTRN,V<br>PS13A,YPEL3,ZKSC<br>AN1,ZNF654                                                                                                                                                                                                                                                                                                                                                                                                                                                                                                                                                    |     |
| Cancer,Organismal<br>Injury And<br>Abnormalities | Breast Or<br>Colorectal<br>Cancer | Breast Or<br>Colorectal<br>Cancer | 4.25E-06 | -1.434 | AASDH,ABCB1,ABC<br>G2,ABCG5,ACLY,AC<br>OX2,ACSL5,ACSS2,<br>ACTR6,AFG3L2,AGP<br>AT2,AHCY,AKAP9,AL<br>AS1,ALDH1L1,ALG13<br>,ANKRD12,ANXA7,A<br>RHGAP21,ARL6IP4,A<br>SAP2,ASB13,ATG3,A<br>TG4D,ATP1A1,ATXN<br>2L,BAAT,BAP1,C11or<br>f54,C9orf152,CAPN2,<br>CARS1,CCDC66,CC<br>T3,CCT4,CCT5,CCT7<br>,CD2AP,CD9,CD99L2<br>,CDH1,CDH2,CDO1,<br>CEBPD,CES1,CGN,C<br>HCHD3,CHD6,CHPT<br>1,CHRA1,CLDND1,<br>CLK2,CLMN,CLOCK,<br>CMTM6,CNOT4,CNP,<br>COL27A1,COL5A3,C<br>PEB4,CPT1A,CS,CT<br>DSP1,CTPS2,CUL4B,<br>CYLD,CYP2U1,CYP4<br>F2,DAZAP1,DCTN1,<br>DDX60,DGKZ,DHX9,<br>DICER1,DIXDC1,DM<br>D,DMTF1,DOCK4,DP<br>P4,DSP,DSTN,E2F5,<br>EGR1,EIF1AX,EIF4E<br>BP1,ELF1,ELOVL6,E<br>RBB3,ESRRA,EXOC<br>6,EXOSC2,F2R,F3,F<br>ADS2,FAM160B1,FE<br>CH,FGA,FGB,FGFR2<br>,FLCN,FMO1,FMO5,F<br>OXO3,FPGS,FTSJ3,<br>G6PD,GAS2L3,GNA1<br>2,GNG12,GSS,GSTM<br>2,GTF2F1,HECA,HE<br>CTD3,HMGCR,HNRN<br>PC,HRAS,HSD17B2,<br>HSPB1,ICK,ID2,IGFB | 302 |

P2,IL18,ING4,IRF6,IRS1,JAK2,JMJD1C,KAT2B,KDM6A,KEAP1,KIAA0100,KITLG,KLF12,KLHL7,KPNB1,KTN1,LGALS4,LGR5,LIN7A,LMNA,LRIG1,LRP12,LRRC3,LTBR,MACROH2A1,MAGED1,MAP1LC3B,MAP2K3,MAP3K7,MEF2A,MIA2,MKNK2,MLLT10,MLX,MON2,MPDZ,MPRI,MRNIP,MRPL24,MRPL34,MRPS9,MT1F,MYO5B,MYO6,NCOA1,NDUFB9,NEK7,NET1,NGEF,NHLRC2,NIPBL,NME1,NOSIP,NPC1,NR3C2,NRIP1,NT5C,NUDT19,NUDT7,NUP62,NUS1,OSBPL1A,PAQR9,PCDH1,PCGF5,PDE9A,PDGFRB,PDLIM1,PDP2,PPDK1,PDRG1,PER1,PFDN2,PGAP1,PHF20L1,PHKA2,PIK3AP1,PIK3CA,PKHD1,PLD1,PLXNA2,PNKD,PNRC1,POR,PPP1R14B,PPP1R1B,PPP1R9A,PPP2R1A,PRPF39,PRPF6,PSMD8,PTBP1,QDPR,RABGAP1L,RASA3,RASSF3,RB1CC1,RBBP5,RGS2,RICTOR,RNF14,ROCK1,RPA1,RUFY3,SAA4,SBF2,SCAPER,SCYL1,SEC63,SECISBP2L,SENP6,SERPINE2,SESN3,SFRP5,SGK2,SHPRH,SLC1A4,SLC20A1,SLC20A2,SLC25A32,SLC27A2,SLC2A2,SLC35B3,SLC38A2,SLC39A10,SLC39A8,SLC6A12,SLC9A3R1,SMAD7,SMAP1,SNRNP200,SNTB1,SNX9,SOAT2,SOD2,SPARC,SPG21,SPOP,SPBN1,SPTBN2,STAR,STIP1,STX8,SULF2,SYAP1,SYNE1,SYT1,TBC1D16,TBC1D24,TBRG4,TCP1,TEP1,THRSP,TIMM44,TK1,TMEM126A,TMEM41B,TMEM97,TNRC6A,TOP1MT,TPI1,TPR,T



|                                                  |           |                       |          |        |                                                                                                                                                                                                                                                                                                                                                                                                                                                                                                                                                                                                                                                                                                                                                                                                                                                                                                                                                                                                                                                                                                                                                                                                                                                                                                     |     |
|--------------------------------------------------|-----------|-----------------------|----------|--------|-----------------------------------------------------------------------------------------------------------------------------------------------------------------------------------------------------------------------------------------------------------------------------------------------------------------------------------------------------------------------------------------------------------------------------------------------------------------------------------------------------------------------------------------------------------------------------------------------------------------------------------------------------------------------------------------------------------------------------------------------------------------------------------------------------------------------------------------------------------------------------------------------------------------------------------------------------------------------------------------------------------------------------------------------------------------------------------------------------------------------------------------------------------------------------------------------------------------------------------------------------------------------------------------------------|-----|
| Cancer,Organismal<br>Injury And<br>Abnormalities | Incidence | Incidence Of<br>Tumor | 9.38E-14 | -1.437 | RIB3,TTC1,TUBB,TU<br>BB6,UBAC1,UBTF,U<br>LK1,UNG,UROC1,US<br>P47,UTRN,VPS13A,<br>WDR18,WDR26,WD<br>R81,WNT5B,YWHAH,<br>ZCCHC24,ZNF23<br>AASDH,ABCB1,ABC<br>B4,ABCG2,ABCG5,A<br>CAD8,ACLY,ACOX2,<br>ACSL3,ACSL4,ACSM<br>1,ACSS2,ACTR6,AF<br>G3L2,AGPAT2,AHNA<br>K,AKAP11,AKAP9,AL<br>AS1,ALDH1L1,ALG13<br>,ANKRD12,ANP32A,<br>ANXA7,ARHGAP21,A<br>RHGAP6,ARIH2,ARL<br>15,ARL6IP4,ASAP2,A<br>SB13,ATG3,ATG4D,A<br>TP1A1,ATXN2L,AUH,<br>BAAT,BAP1,BDH1,B<br>HMT,BID,BIK,BRD8,B<br>UD23,C11orf54,C9orf<br>152,C9orf16,CAPN2,<br>CARS1,CBLB,CCDC<br>66,CCT3,CCT5,CCT6<br>A,CCT7,CD2AP,CD4<br>7,CD9,CD99L2,CDA,<br>CDC14B,CDH1,CDH<br>2,CDO1,CEBPD,CES<br>1,CGN,CHCHD3,CH<br>D6,CHPT1,CHRA1,<br>CLDND1,CLK2,CLMN<br>,CLOCK,CMTM6,CM<br>TM8,CNOT4,CNOT6,<br>CNP,COL27A1,COL5<br>A3,CPEB4,CPT1A,C<br>S,CTDSP1,CTPS2,C<br>TSH,CUL4B,CXADR,<br>CYLD,CYP4F2,CYP7<br>A1,DAZAP1,DCTN1,<br>DDX60,DEK,DGKZ,D<br>HX9,DIAPH2,DICER1<br>,DIO1,DIPK2A,DIXDC<br>1,DMD,DMTF1,DOCK<br>4,DPP4,DPP9,DSP,D<br>STN,DUSP19,DVL1,E<br>2F5,EGR1,EIF1AX,EI<br>F4EBP1,ELF1,ENPP<br>1,ERBB3,ESRRA,EX<br>OC6,EXTL2,F11,F2R,<br>F3,FAM102A,FAM16<br>0B1,FAM172A,FECH,<br>FGA,FGB,FGFR2,FG<br>G,FH,FLCN,FMO1,F<br>MO5,FOXO3,FTSJ3,<br>G6PD,GAS2L3,GNA1<br>2,GNG12,GOLGB1,G<br>PD2,GRHPR,GSK3A,<br>GSS,GSTM2,GTF2F1<br>,GTF3C2,GYG1,HEC | 411 |
|--------------------------------------------------|-----------|-----------------------|----------|--------|-----------------------------------------------------------------------------------------------------------------------------------------------------------------------------------------------------------------------------------------------------------------------------------------------------------------------------------------------------------------------------------------------------------------------------------------------------------------------------------------------------------------------------------------------------------------------------------------------------------------------------------------------------------------------------------------------------------------------------------------------------------------------------------------------------------------------------------------------------------------------------------------------------------------------------------------------------------------------------------------------------------------------------------------------------------------------------------------------------------------------------------------------------------------------------------------------------------------------------------------------------------------------------------------------------|-----|

A,HECTD3,HERC4,H  
LF,HMGCR,HNRNPC  
,HRAS,HSPB1,ICK,ID  
2,ID4,IGFBP2,IL18,IN  
G4,IRF6,IRS1,ITPA,J  
AK2,JMJD1C,KAT2B,  
KCMF1,KDM6A,KEA  
P1,KIAA0100,KITLG,  
KLF12,KLF9,KLHL7,K  
PNB1,KTN1,KYNU,L2  
HGDH,LGR5,LIN7A,L  
MNA,LRIG1,LRP12,L  
RRC28,LRRC3,LSM1  
4B,LTBR,MACROH2  
A1,MAGED1,MAGI3,  
MAP2K3,MAP3K7,M  
BNL2,MCOLN1,MEF2  
A,MIA2,MKNK2,MLLT  
10,MLX,MOCOS,MO  
N2,MPDZ,MPP1,MPR  
IP,MRNIP,MRPL44,M  
RPS22,MRPS27,MR  
PS9,MYO1B,MYO5B,  
MYO6,N4BP2L1,NCO  
A1,NDUFA9,NEK7,N  
ET1,NFKBIA,NGEF,N  
HLRC2,NINJ1,NIPBL,  
NME1,NOSIP,NPC1,  
NR1H4,NR2F6,NR3C  
2,NR5A2,NRIP1,NUD  
T1,NUDT19,NUDT7,  
NUP62,NUP88,OAZ1,  
OSBPL1A,OXR1,PAL  
MD,PAN2,PAN3,PAQ  
R9,PCDH1,PCGF5,P  
DCD2,PDE2A,PDE9A  
,PDGFC,PDGFRB,PD  
LIM1,PDP2,PDPK1,P  
ER1,PER3,PFDN2,P  
GAP1,PHF20L1,PHK  
A2,PIK3AP1,PIK3CA,  
PKHD1,PLD1,PLXNA  
2,PMPCA,PNKD,PNR  
C1,POR,PPIF,PPP1R  
12A,PPP1R14B,PPP  
1R1B,PPP1R9A,PPP  
2R1A,PRDX6,PRPF1  
9,PRPF39,PRPF6,PS  
EN2,PSMA6,PSMD1,  
PSMD2,PSMD8,PTB  
P1,PTBP2,QDPR,RA  
BEPK,RABGAP1L,RA  
I14,RALGPS2,RASSF  
3,RB1CC1,RBBP5,R  
BBP7,RCL1,RGS2,R  
HBDD1,RICTOR,RO  
CK1,RPA1,RPIA,RUF  
Y3,SAA4,SARS1,SBF  
2,SCAPER,SCARB2,  
SCYL1,SDC4,SEC63,  
SECISBP2L,SEN6,  
SERPINE2,SERPINH

|                                                                          |               |               |          |        |                                                                                                                                                                                                                                                                                                                                                                                                                                                                                                                                                                                                                                                                                                  |     |
|--------------------------------------------------------------------------|---------------|---------------|----------|--------|--------------------------------------------------------------------------------------------------------------------------------------------------------------------------------------------------------------------------------------------------------------------------------------------------------------------------------------------------------------------------------------------------------------------------------------------------------------------------------------------------------------------------------------------------------------------------------------------------------------------------------------------------------------------------------------------------|-----|
|                                                                          |               |               |          |        | 1, SESN3, SETDB2, SGTB, SHPRH, SLC1A4, SLC20A1, SLC20A2, SLC2A2, SLC2A5, SLC2A9, SLC30A10, SLC35B3, SLC38A2, SLC39A10, SLC39A8, SLC6A12, SLC9A3R1, SMAD7, SMAP1, SNRNP200, SNTB1, SNX10, SNX9, SOAT2, SOD2, SPARC, SPON2, SPOP, SPTBN1, SPTBN2, STAR, STIP1, STK24, STK40, STOM, STT3B, STX8, STXBP3, SULF2, SYAP1, SYNE1, SYT1, TBC1D16, TBC1D20, TBC1D24, TBRG4, TCP1, TEP1, TEX2, TIGD2, TMEM44, TK1, TLCD4, TLE1, TMEM126A, TME41B, TMEM51, TME41B, TNFAIP2, TNRC6A, TOP1MT, TPI1, TPR, TPRG1L, TRIB3, TPAN33, TTC1, TUBB, TUBB6, TXNL1, UBAC1, UBE2F, UBTF, UGP2, UGT2B10, ULK1, UNG, UROC1, UTP14A, UTRN, UXS1, VPS13A, WDR18, WDR26, WDR81, WIPI2, WNT5B, ZCHC24, ZFAND2B, ZKSCAN1, ZNF32 |     |
| Cancer, Organismal Injury And Abnormalities, Reproductive System Disease | Mammary Tumor | Mammary Tumor | 7,31E-04 | -1,489 | ABC1, ABCG2, ACS2, AGPAT2, AKAP9, ALDH1L1, ANKRD12, ATP1A1, BAP1, CAPN2, CCT3, CD9, CDH1, CDH2, CEBPD, CES1, CLK2, COL27A1, CPT1A, CYLD, CYP2U1, DAZAP1, DGKZ, DICER1, DXDC1, DMD, DMTF1, DOCK4, DPP4, DSP, E2F5, EGR1, EIF1AX, EIF4EBP1, ELOVL6, ERBB3, ESRRB, EXOC6, EXOSC2, F2R, FADS2, FGA, FGFR2, FOXO3, FTSJ3, GNA12, GSTM2, HMGCR, HRAS, HSPB1, IGFBP2, IL18, ING4, IRS1, JAK2, JMJD1C, KDM6A, KEAP1, KIAA0100, LGALS4, LMNA, MACROH2A1, MAP1LC3B, MAP2K3, MKNK2, MPDZ, MRPL24, MRPL34, MT1F, MYO5B                                                                                                                                                                                       | 130 |

|                                                                     |             |                                      |          |        |  |                                                                                                                                                                                                                                                                                                                                                                                                                                                                                                                                                                                                                                                                   |     |
|---------------------------------------------------------------------|-------------|--------------------------------------|----------|--------|--|-------------------------------------------------------------------------------------------------------------------------------------------------------------------------------------------------------------------------------------------------------------------------------------------------------------------------------------------------------------------------------------------------------------------------------------------------------------------------------------------------------------------------------------------------------------------------------------------------------------------------------------------------------------------|-----|
|                                                                     |             |                                      |          |        |  | ,MYO6,NDUFB9,NEK7,NFKBIA,NIPBL,NME1,NPC1,NR3C2,NRIP1,NUS1,PDGFRB,PPDK1,PGAP1,PHF20L1,PHKA2,PIK3CA,PKHD1,PNRC1,POR,PP1R1B,PPP2R1A,PRPF39,PTBP1,RASA3,RB1CC1,RGS2,RICTOR,RNF14,ROCK1,SBF2,SECISBP2L,SFRP5,SLC20A1,SLC25A32,SLC9A3R1,SNTB1,SOD2,SPARC,SPG21,SPOP,SPTBN2,STARD7,STIP1,SYNE1,TCP1,TEP1,THRSPTIMM44,TK1,TLE1,TMEM97,TNRC6A,TOP1MT,TPI1,TUBB,TUBB6,USP47,UTRN,WNT5B,YWHAH                                                                                                                                                                                                                                                                                |     |
| Cancer,Gastrointestinal Disease,Organismal Injury And Abnormalities | Development | Development Of Digestive Organ Tumor | 1.16E-05 | -1.492 |  | AASDH,ABCB1,ABCB4,ABCG5,ACLY,ACSS2,ACTR6,AFG3L2,AGPAT2,AHNAK,AKAP9,ALDH1L1,ALG13,ANXA7,ARHGAP21,ARL6IP4,ASAP2,ASB13,ATG3,ATG4D,ATXN2L,BAAT,BAP1,BHMT,BRD8,C11orf54,C9orf152,CARS1,CBLB,CCDC66,CCT7,CD2AP,CD99L2,CDH1,CDH2,CDO1,CES1,CGN,CHCHD3,CHD6,CHPT1,CHRA1,CLDN1,CLK2,CLMN,CLOCK,CMTM6,CNOT4,CNP,COL27A1,COL5A3,CPEB4,CPT1A,CS,CTDSP1,CTPS2,CUL4B,CYLD,CYP4F2,DAZAP1,DCTN1,DDX60,DGKZ,DHX9,DICER1,DMD,DMTF1,DOCK4,DSP,DSTN,EGR1,ELF1,ERBB3,ESRRA,F3,FAM102A,FAM160B1,FGB,FGFR2,FLCN,FMO1,FMO5,G6PD,GAS2L3,GNG12,GPD2,GSS,GTF2F1,HECA,HECTD3,HMGCR,HNRNPC,HRAS,HSPB1,ICK,IGFBP2,IL18,ING4,IRF6,IRS1,JAK2,JMD1C,KAT2B,KDM6A,KEAP1,KIAA0100,KITLG,KLF12,KLHL7,K | 257 |

Cancer,Organismal  
Injury And  
Abnormalities

Neoplasia

Lymphatic  
System Tumor

9.85E-05

-1.493

PNB1,KTN1,KYNU,L  
GR5,LIN7A,LRIG1,LR  
P12,LRRC3,LTBR,M  
AGED1,MAP3K7,MB  
NL2,MEF2A,MIA2,MK  
NK2,MLLT10,MLX,M  
ON2,MPDZ,MPRIIP,M  
RNIP,MRPS9,MYO5B  
,MYO6,NCOA1,NEK7  
,NET1,NGEF,NHLRC  
2,NIPBL,NOSIP,NR1  
H4,NR3C2,NRIP1,NU  
DT1,NUDT19,NUDT7  
,NUP62,OSBPL1A,P  
AN2,PAN3,PAQR9,P  
CDH1,PCGF5,PDE2A  
,PDE9A,PDGFC,PDG  
FRB,PDP2,PDPK1,P  
ER1,PER3,PFDN2,P  
GAP1,PHF20L1,PHK  
A2,PIK3AP1,PIK3CA,  
PKHD1,PLXNA2,PMP  
CA,PNKD,PNRC1,PO  
R,PPP1R12A,PPP1R  
14B,PPP1R9A,PPP2  
R1A,PRPF39,PRPF6,  
PSMD8,PTBP1,QDP  
R,RABGAP1L,RASSF  
3,RB1CC1,RBBP5,RI  
CTOR,ROCK1,RPA1,  
RUFY3,SAA4,SARS1  
,SBF2,SCAPER,SCY  
L1,SDC4,SEC63,SEC  
ISBP2L,SENP6,SER  
PINE2,SERPINH1,SE  
SN3,SETDB2,SGTB,  
SHPRH,SLC1A4,SLC  
20A1,SLC20A2,SLC2  
A2,SLC38A2,SLC39A  
10,SLC39A8,SLC6A1  
2,SMAD7,SMAP1,SN  
RNP200,SNTB1,SNX  
9,SOAT2,SPOP,SPT  
BN1,SPTBN2,STIP1,  
STX8,SULF2,SYAP1,  
SYNE1,SYT1,TBC1D  
16,TBC1D24,TBRG4,  
TCP1,TEP1,TIMM44,  
TK1,TMEM126A,TME  
M41B,TMEM97,TNR  
C6A,TOP1MT,TPR,T  
TC1,TUBB,UBAC1,U  
BTF,ULK1,UNG,URO  
C1,UTRN,VPS13A,W  
DR18,WDR26,WDR8  
1,WIPI2,WNT5B,ZCC  
HC24,ZNF32  
ABCB1,ABCG2,AHN  
AK,AKAP11,ANXA7,A  
SAP2,ATP1B1,BAP1,  
BID,CBLB,CCT3,CCT  
7,CD47,CDH1,CDO1,

114

|                                             |                                    |                                    |          |        |                                                                                                                                                                                                                                                                                                                                                                                                                                                                                                                                                                                                    |     |
|---------------------------------------------|------------------------------------|------------------------------------|----------|--------|----------------------------------------------------------------------------------------------------------------------------------------------------------------------------------------------------------------------------------------------------------------------------------------------------------------------------------------------------------------------------------------------------------------------------------------------------------------------------------------------------------------------------------------------------------------------------------------------------|-----|
|                                             |                                    |                                    |          |        | CEBPD,CHD6,CITED2,CNP,COL27A1,CTSH,CUL4B,DDC,DEK,DGKZ,DICER1,DIO1,DMD,DMTF1,DPP4,DSP,EGR1,EIF4EBP1,ENPP1,ERBB3,EXTL2,F2R,F3,FAM102A,FBXO31,FBXO9,FGFR2,FOXO3,FPGS,GNA12,GPD2,GRHPR,HECA,HMGCR,HRAS,HSPB1,ICK,ID2,IL18,AK2,JMJD1C,KDM6A,KIAA0100,KITLG,KPNB1,LPIN1,LRIG1,LTBR,MAGED1,MAP2K3,MEF2A,MIA2,MKNK2,MLLT10,MPDZ,MRPL20,MYO5B,NFKBIA,NINJ1,NIPBL,NME1,PALMD,PDE9A,PDGFC,PDGFRB,PDPK1,PER1,PIK3CA,PLXNA2,PNKD,PNRC1,POLE4,POR,PRPF19,PRPS1,PSMD1,PSMD2,RAN,RICTOR,RP A1,SARS1,SERPINH1,SHMT1,SLC25A32,SMAD7,SOD2,SPARC,SPTBN1,STIP1,STK24,SYT1,TBC1D16,TPR,TUBB6,TUT4,UBE2F,UBR1,UNG,VP S13A |     |
| Developmental Disorder                      | Growth Failure                     | Growth Failure                     | 3.12E-04 | -1.498 | AQP11,BAP1,CD2AP,CDH2,CUL4B,CYP7A1,DMTF1,DNAJC5,EGR1,F11,F2R,F3,FGFR2,FGFRL1,FKBP4,GCLC,GPD2,HNRNPD,HSD17B2,HSD3B7,ID2,IRS1,ITPA,KAT2B,KDM6A,LMNA,MACROH2A1,MAP3K7,MCOLN1,NEK7,NFKBIA,NINJ1,PDCCD2,P GAP1,POR,PSEN2,SCYL1,SFRP5,SLC20A1,SOD2,SULF2,SYNE1                                                                                                                                                                                                                                                                                                                                           | 42  |
| Cancer, Organismal Injury And Abnormalities | Extraadrenal Retroperitoneal Tumor | Extraadrenal Retroperitoneal Tumor | 3.97E-06 | -1.526 | AASDH,ABCB1,ABCB4,ABCG2,ABTB2,ACAT2,ACLY,ACOX2,ACSM5,ADH4,AHNK,AKAP11,AKAP9,ALAS1,ALG13,ANKRD12,ANP32A,ARHGAP21,ATXN2L,BAP1,BRD8,C9orf152,CAMKK2,CAPN2,CBLB,CCDC                                                                                                                                                                                                                                                                                                                                                                                                                                   | 188 |

66,CCT3,CD9,CDC14  
 B,CDH1,CDH2,CHD6  
 ,COL5A3,CUL4B,CYL  
 D,CYP4F2,DCTN1,D  
 HX9,DIAPH2,DICER1  
 ,DIO1,DMD,DOCK4,D  
 PP4,DUSP19,E2F5,E  
 CHDC3,EGR1,EIF1A  
 X,ERBB3,ESRRA,EX  
 OC6,EXTL2,F11,F3,F  
 GA,FGFR2,FH,FLCN,  
 FMO1,FOXO3,FTSJ3  
 ,G6PD,GABARAP,GA  
 S2L3,GCLC,GOLGB1  
 ,GRHPR,GTF3C2,HE  
 RC4,HMGCR,HNRNP  
 C,HRAS,ID2,IL18,IRF  
 6,IRS1,JAK2,KDM6A,  
 KEAP1,KIAA0100,KL  
 F12,KLF9,KLHL7,LG  
 R5,LIN7A,LMNA,LRI  
 G1,LSM14B,LSS,MA  
 GI3,MAP2K3,MIA2,M  
 KNK2,MLLT10,MOC  
 OS,MPDZ,MPP1,MR  
 PL24,MRPS27,MYO1  
 B,MYO5B,N4BP2L1,  
 NAGK,NCOA1,NFKBI  
 A,NGEF,NINJ1,NIPB  
 L,NME1,NPC1,NR5A  
 2,NRIP1,NUP62,PAN  
 2,PAQR9,PCDH1,PD  
 E2A,PDGFRB,PHKA2  
 ,PIK3CA,PKHD1,PLX  
 NA2,PNKD,POR,PPP  
 1R1B,PPP1R9A,PPP  
 2R1A,PRPF6,PRPS1,  
 PSMD1,PSMD11,PS  
 MD2,PSMF1,PXMP4,  
 RAB11FIP2,RAI14,R  
 B1CC1,RBBP5,RCL1,  
 RHOD,RPA1,SBF2,S  
 CAPER,SEC63,SENP  
 6,SERPINE2,SERPIN  
 H1,SETDB2,SHMT1,  
 SHPRH,SLC1A4,SLC  
 20A2,SLC2A5,SLC2A  
 9,SLC35B1,SLC39A8  
 ,SLC9A3R1,SMAD7,  
 SNRNP200,SNX10,S  
 OD2,SPARC,SPTBN  
 1,ST3GAL4,STARD7,  
 STXBP3,SYNE1,TEP  
 1,TEX2,TMEM126A,T  
 MEM51,TNRC6A,TO  
 P1MT,TRIB3,TUBB,T  
 UBB6,TUBGCP2,TXN  
 L1,UBE2F,UGP2,UR  
 OD,UTP14A,UTRN,V  
 PS13A,WNT5B,ZFAN  
 D2B,ZNF654

|                      |               |               |          |        |                  |     |
|----------------------|---------------|---------------|----------|--------|------------------|-----|
| Cancer,Gastrointesti | Hepatobiliary | Hepatobiliary | 1.24E-07 | -1.542 | ABCB4,ABCG8,ACLY | 252 |
|----------------------|---------------|---------------|----------|--------|------------------|-----|

nal Disease,Hepatic  
System  
Disease,Organismal  
Injury And  
Abnormalities

System  
Cancer

System Cancer

,ACOX2,ACSS2,ADH  
4,AHNAK,AKAP11,A  
KAP9,AKR1D1,AMD  
HD1,ANKRD12,ANXA  
7,ARGLU1,ARHGAP2  
1,ARHGAP6,ASAP2,  
ASB13,ATP1A1,ATP1  
B1,ATXN2L,BAAT,BA  
P1,BDH1,BHMT,BHM  
T2,BUD23,CARS1,C  
BLB,CCT6A,CD47,C  
DH1,CDH2,CES1,CH  
D6,CIB3,CLK2,CLMN  
,CMTM6,CNOT4,COL  
27A1,COL5A3,CPEB  
4,CRIP2,CROT,CS,C  
TPS2,CUL4B,CXADR  
,CYP39A1,CYP7A1,C  
YTH1,DDC,DEK,DIA  
PH2,DICER1,DIPK2A  
,DMD,DOCK4,DPP4,  
DPP9,E2F5,EIF1AX,  
EIF4EBP1,ENPP1,ER  
BB3,ESRRA,EXTL2,F  
3,FAM160B1,FBXO9,  
FGA,FGB,FGFR2,FG  
FRL1,FGG,FLCN,FO  
XK1,FPGS,G6PD,GA  
S2L3,GCLC,GNA12,  
GOLGB1,GPD2,GRH  
PR,GSDMD,GTF3C2,  
HECA,HLF,HMGCR,  
HRAS,ID2,ID4,IGFBP  
2,IL18,ING4,IRS1,JM  
JD1C,KDM6A,KEAP1  
,KIAA0100,KLHDC2,  
KPNB1,KTN1,KYNU,  
LARS2,LGR5,LIN7A,  
LMNA,LTBR,MACRO  
H2A1,MAGI3,MAP1L  
C3B,MAP2K3,MAP3K  
7,MEF2A,MON2,MPD  
Z,MPRIIP,MRNIP,MR  
PL24,MRPS22,MYO6  
,NCALD,NCOA1,NET  
1,NGEF,NIPBL,NME1  
,NPC1,NR1H4,NR2F  
6,NR3C2,NR5A2,NRI  
P1,NT5C,OSBPL1A,  
OXR1,PAN2,PAN3,P  
AQR9,PCDH1,PDE2  
A,PDGFC,PDGFRB,P  
DLIM1,PER1,PEX26,  
PGAP1,PHF20L1,PIK  
3AP1,PIK3CA,PKHD1  
,PLD1,PLXNA2,PMP  
CA,PNRC1,POR,PP  
M1A,PPOX,PPP1R1B  
,PPP1R9A,PPP2R1A,  
PRPF6,PSMD1,PSM  
D11,PSMD2,PSPH,P  
TBP2,RABGAP1L,RA



|                                                                                                            |        |              |          |        |                                                                                                                                                                                                                                                                                                                                                                                                                                                                                                                                   |                                                                                                                                                                                                                                                                                                                                                                                                                                                                                                                                                                      |  |
|------------------------------------------------------------------------------------------------------------|--------|--------------|----------|--------|-----------------------------------------------------------------------------------------------------------------------------------------------------------------------------------------------------------------------------------------------------------------------------------------------------------------------------------------------------------------------------------------------------------------------------------------------------------------------------------------------------------------------------------|----------------------------------------------------------------------------------------------------------------------------------------------------------------------------------------------------------------------------------------------------------------------------------------------------------------------------------------------------------------------------------------------------------------------------------------------------------------------------------------------------------------------------------------------------------------------|--|
|                                                                                                            |        |              |          |        |                                                                                                                                                                                                                                                                                                                                                                                                                                                                                                                                   | LGPS2,RAN,RASA3, RB1CC1,RBBP5,RCL 1,RICTOR,RNF167,R OCK1,RUFY3,SAA4, SARS1,SCAPER,SD C4,SECISBP2L,SEN P6,SERPINA6,SESN 3,SFRP5,SGK2,SGT B,SIRT5,SLC10A1,SL C1A4,SLC20A1,SLC2 0A2,SLC2A2,SLC2A5 ,SLC35B3,SLC38A2, SLC39A10,SLC39A8, SLC6A12,SLK,SNRN P200,SNTB1,SNX9,S OAT2,SOD2,SPARC, SPTBN1,SPTBN2,ST K24,STK40,SULF2,S UMF1,SYNE1,TBC1D 16,TCIM,TEP1,TEX2, THAP4,TIGD2,TIMM4 4,TLE1,TMEM219,TM EM41A,TMEM62,TNF AIP8L1,TNRC6A,TO P1MT,TPI1,TPR,TSN,T SPAN33,TTC1,TUBB, TUBGCP2,TXNL1,UB AC1,UBXN1,UBXN6, UCK1,UGP2,UGT2B1 0,UPP2,UROC1,USP 47,UTRN,YWHAH,ZC CHC24 |  |
| Cancer,Gastrointesti<br>nal Disease,Hepatic<br>System<br>Disease,Organismal<br>Injury And<br>Abnormalities | Cancer | Liver Cancer | 1.68E-07 | -1.542 | ABCB4,ABCG8,ACLY ,ACOX2,ACSS2,ADH 4,AHNAK,AKAP9,AK R1D1,AMDHD1,ANK RD12,ANXA7,ARGLU 1,ARHGAP21,ARHG AP6,ASAP2,ASB13,A TP1A1,ATP1B1,ATX N2L,BAP1,BDH1,BH MT,BHMT2,BUD23,C ARS1,CBLB,CCT6A, CD47,CDH1,CDH2,C ES1,CHD6,CIB3,CLK 2,CLMN,CMTM6,CN OT4,COL27A1,CPEB 4,CRIP2,CROT,CXA DR,CYP39A1,CYP7A 1,CYTH1,DDC,DIAPH 2,DICER1,DIPK2A,D MD,DOCK4,DPP4,DP P9,E2F5,EIF1AX,EIF 4EBP1,ENPP1,ERBB 3,ESRRA,EXTL2,F3, FAM160B1,FBXO9,F GA,FGB,FGFR2,FGG ,FLCN,FOXK1,FPGS, G6PD,GAS2L3,GCLC ,GNA12,GOLGB1,GP D2,GRHPR,GSDMD, GTF3C2,HECA,HLF, | 240                                                                                                                                                                                                                                                                                                                                                                                                                                                                                                                                                                  |  |

HMGC,HRAS,ID2,I  
 D4,IGFBP2,IL18,ING  
 4,IRS1,JMJD1C,KDM  
 6A,KEAP1,KIAA0100,  
 KLHDC2,KPNB1,KTN  
 1,KYNU,LARS2,LGR  
 5,LMNA,LTBR,MACR  
 OH2A1,MAGI3,MAP1  
 LC3B,MAP2K3,MAP3  
 K7,MEF2A,MON2,MP  
 DZ,MPRIIP,MRNIP,M  
 RPL24,MRPS22,MYO  
 6,NCALD,NCOA1,NE  
 T1,NGEF,NIPBL,NME  
 1,NPC1,NR1H4,NR2  
 F6,NR3C2,NR5A2,N  
 RIP1,NT5C,OSBPL1  
 A,OXR1,PAN2,PAN3,  
 PAQR9,PCDH1,PDE  
 2A,PDGFC,PDGFRB,  
 PDLIM1,PER1,PEX26  
 ,PGAP1,PHF20L1,PI  
 K3AP1,PIK3CA,PKH  
 D1,PLD1,PLXNA2,P  
 MPCA,PNRC1,POR,  
 PPM1A,PPOX,PPP1  
 R1B,PPP1R9A,PPP2  
 R1A,PRPF6,PSMD1,  
 PSMD11,PSMD2,PS  
 PH,PTBP2,RABGAP1  
 L,RALGPS2,RAN,RA  
 SA3,RB1CC1,RBBP5  
 ,RCL1,RICTOR,RNF1  
 67,ROCK1,RUFY3,S  
 AA4,SARS1,SCAPER  
 ,SDC4,SECISBP2L,S  
 ENP6,SESN3,SFRP5  
 ,SGK2,SGTB,SIRT5,  
 SLC10A1,SLC1A4,SL  
 C20A2,SLC2A2,SLC2  
 A5,SLC35B3,SLC38A  
 2,SLC39A10,SLC39A  
 8,SLC6A12,SLK,SNR  
 NP200,SNX9,SOAT2,  
 SOD2,SPARC,SPTB  
 N1,SPTBN2,STK24,S  
 TK40,SULF2,SUMF1,  
 SYNE1,TBC1D16,TCI  
 M,TEP1,TEX2,THAP4  
 ,TIGD2,TIMM44,TLE1  
 ,TMEM219,TMEM41A  
 ,TMEM62,TNFAIP8L1  
 ,TNRC6A,TOP1MT,T  
 PI1,TPR,TSN,TSPAN  
 33,TTC1,TUBB,TUBG  
 CP2,TXNL1,UBAC1,  
 UBXN1,UBXN6,UCK1  
 ,UGP2,UGT2B10,UP  
 P2,UROC1,USP47,U  
 TRN,YWHAH,ZCCHC  
 24

Cell-To-Cell

Adhesion

Adhesion Of

4.44E-04

-1.562

ARHGAP21,CD47,CD 25

|                                            |                          |                          |          |        |                                                                                                                                                                                                                                                                                                                                                                                                                                                                                                                                                                                                                                                                                                                                                                                                                                                                                                                                                                                        |     |
|--------------------------------------------|--------------------------|--------------------------|----------|--------|----------------------------------------------------------------------------------------------------------------------------------------------------------------------------------------------------------------------------------------------------------------------------------------------------------------------------------------------------------------------------------------------------------------------------------------------------------------------------------------------------------------------------------------------------------------------------------------------------------------------------------------------------------------------------------------------------------------------------------------------------------------------------------------------------------------------------------------------------------------------------------------------------------------------------------------------------------------------------------------|-----|
| Signaling And Interaction                  |                          | Tumor Cell Lines         |          |        | 9,CDH1,CDH2,CYTH1,DSP,EGR1,ERBB3,F2R,FGA,FGFR2,HRAS,IL18,IRS1,LGALS4,LTBR,MYO6,NET1,NFKBIA,NME1,PLD1,RCAN1,TCIM,UTRN                                                                                                                                                                                                                                                                                                                                                                                                                                                                                                                                                                                                                                                                                                                                                                                                                                                                   |     |
| Cancer,Organismal Injury And Abnormalities | Non-Melanoma Solid Tumor | Non-Melanoma Solid Tumor | 5.36E-28 | -1.591 | AASDH,ABCB1,ABC B4,ABCG2,ABCG5,A BCG8,ABTB2,ACAD8 ,ACAT2,ACLY,ACOX 2,ACSL3,ACSL4,ACS L5,ACSM1,ACSM5,A CSS2,ACTR6,ADH4, AFG3L2,AGPAT2,AH CY,AHNAK,AHSA1,A KAP11,AKAP9,AKR1 D1,ALAS1,ALDH1L1, ALG13,AMDHD1,AN KRD12,ANP32A,ANX A7,ARF3,ARGLU1,A RHGAP18,ARHGAP2 1,ARHGAP6,ARIH2,A RL15,ARL4A,ARL6IP 4,ARSG,ASAP2,ASB 13,ATG3,ATG4D,ATP 1A1,ATP1B1,ATP6V1 D,ATXN2L,AUH,BAA T,BAP1,BDH1,BHMT, BHMT2,BID,BIK,BLM H,BRD8,BUD23,C11o rf54,C9orf152,C9orf1 6,CA3,CAMKK2,CAP N2,CARS1,CBLB,CC BE1,CCDC66,CCT3, CCT4,CCT5,CCT6A, CCT7,CD2AP,CD47, CD9,CD99L2,CDA,C DC14B,CDH1,CDH2, CDO1,CEBPD,CENP V,CES1,CGN,CHCH D3,CHCHD4,CHD6,C HPT1,CHRAC1,CIB3, CITED2,CLDND1,CL K2,CLMN,CLOCK,CM TM6,CMTM8,CNN3,C NOT4,CNOT6,CNP,C OL27A1,COL5A3,CO RO1B,CPEB4,CPT1A ,CRIP2,CRLS1,CROT ,CS,CSRNP1,CTDSP 1,CTPS2,CTSH,CUL4 B,CXADR,CYB5B,CY LD,CYP2U1,CYP39A 1,CYP4F2,CYP7A1,C YTH1,DAZAP1,DCTN 1,DDC,DDX60,DEK,D GKZ,DHX9,DIAPH2,D ICER1,DIO1,DIPK2A, DIXDC1,DMD,DMTF1 ,DNAJB1,DNAJC5,D OCK4,DPP4,DPP9,D | 585 |

SP,DSTN,DTYMK,DU  
SP19,DVL1,E2F5,EC  
HDC1,EEPD1,EFHD2  
,EGR1,EIF1AX,EIF4E  
BP1,ELF1,ENDOG,E  
NPP1,ERBB3,ESRRA  
,EXOC6,EXOSC2,EX  
TL2,F11,F2R,F3,FAD  
S2,FAM102A,FAM11  
8B,FAM160B1,FAM1  
72A,FAM76B,FAM89  
A,FBXO31,FBXO9,FE  
CH,FGA,FGB,FGFR2  
,FGFRL1,FGG,FH,FK  
BP4,FLCN,FMO1,FM  
O5,FOXK1,FOXO3,F  
PGS,FTSJ3,G6PD,G  
AS2L3,GCAT,GCLC,  
GCNT2,GDA,GNA12,  
GNG12,GOLGB1,GP  
D2,GPN1,GRHPR,GS  
DMD,GSK3A,GSS,G  
STM2,GTF2A2,GTF2  
F1,GTF3C2,GYG1,H  
ECA,HECTD3,HERC  
4,HLF,HMG20B,HMG  
CR,HNRNPC,HNRNP  
D,HOMER2,HOOKE1,  
HRAS,HSD17B2,HSD  
3B7,HSPB1,ICK,ID2,I  
D4,IGFBP2,IL18,ING  
4,IRF6,IRS1,ITPA,ITP  
K1,JAK2,JMJD1C,KA  
T2B,KCMF1,KDM6A,  
KEAP1,KHK,KIAA010  
0,KITLG,KLF12,KLF9,  
KLHDC2,KLHL21,KL  
HL7,KPNB1,KTN1,KY  
NU,L2HGDH,LARS2,  
LGALS4,LGR5,LIN7A  
,LIN7C,LITAF,LMNA,  
LPIN1,LRIG1,LRP12,  
LRRC28,LRRC3,LSM  
14B,LSS,LTBR,MAC  
ROH2A1,MAGED1,M  
AGI3,MAP1LC3B,MA  
P2K3,MAP3K7,MBNL  
2,MCOLN1,MEF2A,M  
IA2,MKNK2,MLLT10,  
MLX,MMD,MOCOS,M  
ON2,MPDZ,MPP1,M  
PRIP,MRNIP,MRPL1  
2,MRPL20,MRPL24,  
MRPL44,MRPS22,M  
RPS25,MRPS27,MR  
PS9,MT1F,MYO1B,M  
YO5B,MYO6,N4BP2,  
N4BP2L1,NAGK,NCA  
LD,NCOA1,NDUFA12  
,NDUFA9,NDUFB9,N  
EK7,NET1,NFKBIA,N  
GEF,NHLRC2,NINJ1,

NIPBL,NME1,NOSIP,  
NPC1,NR1H4,NR2F6  
,NR3C2,NR5A2,NRIP  
1,NT5C,NUDT1,NUD  
T19,NUDT7,NUP62,N  
UP88,NUS1,OAZ1,O  
SBPL1A,OTUD6B,OX  
R1,PALMD,PAN2,PA  
N3,PAQR9,PCDH1,P  
CGF5,PDCD2,PDE2A  
,PDE9A,PDGFC,PDG  
FRB,PDLIM1,PDP2,P  
DPK1,PDRG1,PER1,  
PER3,PES1,PEX26,P  
EX6,PFDN2,PFKFB1,  
PGAP1,PHF20L1,PH  
KA2,PIK3AP1,PIK3C  
A,PKHD1,PLD1,PLX  
NA2,PMPCA,PNKD,P  
NRC1,POLE4,POR,P  
PIF,PPM1A,PPOX,PP  
P1R12A,PPP1R14B,  
PPP1R1B,PPP1R3B,  
PPP1R9A,PPP2R1A,  
PRDX6,PRPF19,PRP  
F39,PRPF6,PRPS1,P  
RPS2,PSEN2,PSMA6  
,PSMD1,PSMD11,PS  
MD2,PSMD8,PSME2,  
PSMG1,PSPC1,PSP  
H,PTBP1,PTBP2,PX  
MP4,QDPR,RAB11FI  
P2,RAB1B,RABEPK,  
RABGAP1L,RAI14,R  
ALGPS2,RAN,RASA3  
,RASSF3,RB1CC1,R  
BBP5,RBBP7,RBKS,  
RCAN1,RCL1,REPIN  
1,RGS2,RHBDD1,RH  
OD,RICTOR,RNF14,  
RNF144A,RNF167,R  
OCK1,RPA1,RPIA,R  
UFY3,SAA4,SAR1B,S  
ARS1,SBF2,SCAPER  
,SCARB2,SCYL1,SD  
C4,SDR42E1,SEC63,  
SECISBP2L,SENP6,  
SERPINA6,SERPINE  
2,SERPINH1,SESN3,  
SETDB2,SFRP5,SGK  
2,SGTB,SH3D19,SH  
MT1,SHPRH,SIRT5,S  
LC10A1,SLC16A5,SL  
C1A4,SLC20A1,SLC2  
0A2,SLC25A32,SLC2  
7A2,SLC2A2,SLC2A5  
,SLC2A9,SLC30A10,  
SLC35A3,SLC35B1,S  
LC35B3,SLC38A2,SL  
C39A10,SLC39A8,SL  
C6A12,SLC9A3R1,SL  
K,SMAD7,SMAP1,SN

|                                                                                                                                                  |            |                                                |          |        |                                                                                                                                                                                                                                                                                                                                                                                                                                                                                                                                                                                                                                                                                                                                                                                                                                                                                                                                                            |    |
|--------------------------------------------------------------------------------------------------------------------------------------------------|------------|------------------------------------------------|----------|--------|------------------------------------------------------------------------------------------------------------------------------------------------------------------------------------------------------------------------------------------------------------------------------------------------------------------------------------------------------------------------------------------------------------------------------------------------------------------------------------------------------------------------------------------------------------------------------------------------------------------------------------------------------------------------------------------------------------------------------------------------------------------------------------------------------------------------------------------------------------------------------------------------------------------------------------------------------------|----|
|                                                                                                                                                  |            |                                                |          |        | APC2,SNRNP200,SN<br>TB1,SNX10,SNX5,SN<br>X9,SOAT2,SOD2,SP<br>ARC,SPG21,SPON2,<br>SPOP,SPTBN1,SPTB<br>N2,ST3GAL4,STARD<br>7,STIP1,STK24,STK4<br>0,STOM,STT3B,STX1<br>8,STX8,STXBP3,SUL<br>F2,SUMF1,SYAP1,S<br>YNE1,SYT1,TBC1D1<br>6,TBC1D20,TBC1D24<br>,TBRG4,TCIM,TCP1,<br>TEP1,TEX2,THAP4,T<br>HRSP,TIFA,TIGD2,TI<br>MM10,TIMM44,TK1,T<br>LCD4,TLE1,TMBIM1,<br>TMEM126A,TMEM21<br>9,TMEM41A,TMEM41<br>B,TMEM51,TMEM62,<br>TMEM97,TNFAIP2,T<br>NFAIP8L1,TNRC6A,T<br>OP1MT,TPI1,TPR,TP<br>RG1L,TPRKB,TRIB3,<br>TRMT1,TSN,TSPAN3<br>3,TSTA3,TTC1,TTC1<br>9,TUBB,TUBB6,TUB<br>GCP2,TUT4,TXN2,TX<br>NL1,UBAC1,UBE2F,<br>UBE2L3,UBR1,UBTF,<br>UBXN1,UBXN6,UCK1<br>,UGP2,UGT2B10,UL<br>K1,UNG,UPP2,UROC<br>1,UROD,USP47,UTP<br>14A,UTRN,UXS1,VP<br>S13A,WDR18,WDR2<br>6,WDR81,WIP1,WNT<br>5B,YPEL3,YWHAH,Z<br>CCHC24,ZFAND2B,Z<br>KSCAN1,ZNF23,ZNF<br>32,ZNF326,ZNF654<br>ANXA7,CD47,CDH2,<br>F11,F2R,F3,KITLG,L<br>GALS4,LTBR,NFKBI<br>A,RCAN1,RICTOR,S<br>PARC | 13 |
| Cardiovascular<br>System<br>Development And<br>Function,Cell-To-<br>Cell Signaling And<br>Interaction                                            | Binding    | Binding Of<br>Vascular<br>Endothelial<br>Cells | 3.54E-04 | -1.642 |                                                                                                                                                                                                                                                                                                                                                                                                                                                                                                                                                                                                                                                                                                                                                                                                                                                                                                                                                            |    |
| Dermatological<br>Diseases And<br>Conditions,Inflamma<br>tory<br>Disease,Inflammator<br>y<br>Response,Organism<br>al Injury And<br>Abnormalities | Dermatitis | Dermatitis                                     | 8.53E-04 | -1.663 | AHCY,AHNAK,AKR1<br>D1,ARIH2,ATP1A1,B<br>LMH,CD47,CDH1,CN<br>N3,DPP4,DSP,FADS<br>2,FKBP4,FOXO3,FP<br>GS,IL18,JAK2,MAP2<br>K3,NAGK,NFKBIA,N<br>R1H4,PER1,POR,PS<br>EN2,PSMD1,PSMD2,<br>SLC25A32,SMAD7,S<br>TARD7,TPI1                                                                                                                                                                                                                                                                                                                                                                                                                                                                                                                                                                                                                                                                                                                                        | 30 |
| Lipid<br>Metabolism,Small<br>Molecule<br>Biochemistry,Vitami                                                                                     | Metabolism | Metabolism Of<br>Terpenoid                     | 1.58E-05 | -1.666 | ABCG5,ABCG8,ACA<br>T2,ACLY,ADH4,AKR1<br>D1,BAAT,CES1,CYP<br>39A1,CYP4F2,CYP7                                                                                                                                                                                                                                                                                                                                                                                                                                                                                                                                                                                                                                                                                                                                                                                                                                                                               | 29 |

n And Mineral  
Metabolism

Cancer,Organismal  
Injury And  
Abnormalities

Lymphohemat  
opoietic  
Cancer

Lymphohemato  
poietic Cancer

1.11E-05

-1.676

A1,ELOVL6,FECH,G6  
PD,HMGCR,HSD17B  
2,HSD3B7,KPNB1,LS  
S,NPC1,NR1H4,NR5  
A2,NUS1,POR,RAN,  
SDC4,SERPINA6,SO  
AT2,YWHAH  
ABCB1,ABCB4,ABC  
G2,ABCG5,ABCG8,A  
CSL4,AHNAK,AKAP1  
1,ALAS1,ANXA7,ASA  
P2,ATG4D,ATP1A1,A  
TP1B1,BAAT,BAP1,B  
HMT,CAPN2,CBLB,C  
CT3,CCT7,CD47,CD  
A,CDH1,CDO1,CEBP  
D,CHD6,CITED2,CN  
P,COL27A1,CPT1A,C  
TPS2,CTSH,CUL4B,  
DAZAP1,DDC,DDX60  
,DEK,DGKZ,DHX9,DI  
CER1,DIO1,DIPK2A,  
DMD,DMTF1,DNAJC  
5,DPP4,DSP,ECHDC  
3,EGR1,EIF4EBP1,E  
NPP1,ERBB3,EXTL2,  
F2R,F3,FAM102A,FB  
XO31,FBXO9,FGFR2  
,FGG,FOXO3,FPGS,  
GNA12,GPD2,GRHP  
R,GYG1,HECA,HECT  
D3,HMG20B,HMGCR  
,HNRNPD,HOK1,H  
RAS,HSPB1,ICK,ID2,  
ID4,IL18,IRS1,JAK2,J  
MJD1C,KDM6A,KIAA  
0100,KITLG,KPNB1,L  
ARS2,LGALS4,LMNA  
,LPIN1,LRIG1,LRRC3  
,LTBR,MAGED1,MAP  
2K3,MEF2A,MIA2,MK  
NK2,MLLT10,MPDZ,  
MRPL20,MRPL44,MY  
O5B,NET1,NFKBIA,N  
INJ1,NIPBL,NME1,N  
RIP1,NT5C,NUP88,O  
SBPL1A,PALMD,PAN  
3,PAQR9,PDE9A,PD  
GFC,PDGFRB,PDPK  
1,PER1,PER3,PES1,  
PEX6,PIK3AP1,PIK3  
CA,PKHD1,PLXNA2,  
PNKD,PNRC1,POLE  
4,POR,PPM1A,PPP1  
R14B,PPP1R1B,PPP  
1R3B,PRPF19,PRPS  
1,PSEN2,PSMD1,PS  
MD2,PSME2,RAN,RH  
OD,RICTOR,RPA1,S  
ARS1,SCARB2,SERP  
INH1,SGK2,SHMT1,S  
HPRH,SLC25A32,SM

176

|                                                                                  |             |                           |          |        |                                                                                                                                                                                                                                                                                                                                                                                                                                                                                                                                                                                                                                                                                                                                                                                                                                                                                                                             |     |
|----------------------------------------------------------------------------------|-------------|---------------------------|----------|--------|-----------------------------------------------------------------------------------------------------------------------------------------------------------------------------------------------------------------------------------------------------------------------------------------------------------------------------------------------------------------------------------------------------------------------------------------------------------------------------------------------------------------------------------------------------------------------------------------------------------------------------------------------------------------------------------------------------------------------------------------------------------------------------------------------------------------------------------------------------------------------------------------------------------------------------|-----|
|                                                                                  |             |                           |          |        | AD7,SOAT2,SOD2,S<br>PARC,SPTBN1,STIP<br>1,STK24,STK40,SYN<br>E1,SYT1,TBC1D16,T<br>CIM,TEP1,TPI1,TPR,<br>TUBB6,TUT4,UBE2F,<br>UBR1,UBXN1,UGT2B<br>10,UNG,UROC1,VPS<br>13A                                                                                                                                                                                                                                                                                                                                                                                                                                                                                                                                                                                                                                                                                                                                                    |     |
| Carbohydrate<br>Metabolism                                                       | Uptake      | Uptake Of<br>Carbohydrate | 7.87E-04 | -1.68  | ABCB4,COL5A3,CPT<br>1A,CYLD,DPP4,EGR<br>1,ERBB3,ESRRA,FG<br>FR2,G6PD,GSK3A,IR<br>S1,NCOA1,NR1H4,N<br>RIP1,PDPK1,PIK3CA,<br>PLD1,PPM1A,SLC10<br>A1,SLC2A2,SLC2A5,<br>TRIB3                                                                                                                                                                                                                                                                                                                                                                                                                                                                                                                                                                                                                                                                                                                                                   | 23  |
| Cancer,Gastrointesti<br>nal<br>Disease,Organismal<br>Injury And<br>Abnormalities | Colon Tumor | Colon Tumor               | 2.01E-05 | -1.698 | AASDH,ABCB1,ABC<br>G5,ACLY,ACTR6,AF<br>G3L2,AGPAT2,AHCY<br>,AKAP9,ALDH1L1,AL<br>G13,ARHGAP21,ARL<br>6IP4,ASAP2,ASB13,A<br>TG3,ATG4D,ATXN2L,<br>BAAT,BAP1,C11orf54<br>,C9orf152,CARS1,CC<br>DC66,CCT4,CCT5,C<br>CT7,CD2AP,CD99L2,<br>CDH1,CDH2,CDO1,C<br>ES1,CGN,CHCHD3,C<br>HD6,CHPT1,CHRA<br>C1,CLDND1,CLK2,CL<br>MN,CLOCK,CMTM6,<br>CNOT4,CNP,COL27A<br>1,COL5A3,CPEB4,CP<br>T1A,CS,CTDSP1,CT<br>PS2,CUL4B,CYLD,C<br>YP4F2,DCTN1,DDX6<br>0,DHX9,DICER1,DM<br>D,DMTF1,DOCK4,DS<br>TN,EGR1,ELF1,ERB<br>B3,ESRRA,F3,FAM16<br>0B1,FGA,FGF,FGFR<br>2,FLCN,FMO1,FMO5,<br>G6PD,GAS2L3,GNA1<br>2,GNG12,GSS,HECA<br>,HECTD3,HMGCR,H<br>NRNPC,HSD17B2,H<br>SPB1,ICK,IGFBP2,IL<br>18,IRF6,IRS1,JAK2,J<br>MJD1C,KDM6A,KEA<br>P1,KIAA0100,KITLG,<br>KLF12,KLHL7,KPNB1<br>,KTN1,LGR5,LIN7A,L<br>RIG1,LRP12,LRR3,<br>MACROH2A1,MAGE<br>D1,MAP3K7,MIA2,MK<br>NK2,MLLT10,MLX,M<br>ON2,MPRIIP,MRNIP,<br>MRPS9,MT1F,MYO5<br>B,MYO6,NCOA1,NEK | 230 |



|                                                                                             |                           |                           |          |        |                                                                                                                                                                                                                                                                                                                                                                                                                                                                                                                                                                                                                                                                                                                                                                                                                                                                                            |     |
|---------------------------------------------------------------------------------------------|---------------------------|---------------------------|----------|--------|--------------------------------------------------------------------------------------------------------------------------------------------------------------------------------------------------------------------------------------------------------------------------------------------------------------------------------------------------------------------------------------------------------------------------------------------------------------------------------------------------------------------------------------------------------------------------------------------------------------------------------------------------------------------------------------------------------------------------------------------------------------------------------------------------------------------------------------------------------------------------------------------|-----|
|                                                                                             |                           |                           |          |        | 7,NET1,NGEF,NHLR<br>C2,NIPBL,NOSIP,NR<br>1H4,NR3C2,NUDT19,<br>NUDT7,NUP62,OAZ1<br>,OSBPL1A,PAQR9,P<br>CDH1,PCGF5,PDE9A<br>,PDGFRB,PDP2,PDP<br>K1,PER1,PFDN2,PG<br>AP1,PHF20L1,PHKA<br>2,PIK3AP1,PIK3CA,P<br>KHD1,PLD1,PLXNA2,<br>PNKD,PNRC1,PPP1<br>R14B,PPP1R1B,PPP<br>2R1A,PRPF39,PRPF<br>6,PSMD8,PTBP1,QD<br>PR,RABGAP1L,RAS<br>SF3,RB1CC1,RBBP5,<br>RICTOR,ROCK1,RPA<br>1,RUFY3,SAA4,SBF2<br>,SCAPER,SCYL1,SE<br>C63,SECISBP2L,SEN<br>P6,SESN3,SGK2,SH<br>PRH,SLC1A4,SLC20<br>A1,SLC20A2,SLC27A<br>2,SLC2A2,SLC35B3,<br>SLC38A2,SLC39A10,<br>SLC39A8,SLC6A12,S<br>MAD7,SMAP1,SNRN<br>P200,SNX9,SOAT2,S<br>POP,SPTBN1,SPTBN<br>2,STIP1,STX8,SULF2<br>,SYAP1,SYNE1,SYT1<br>,TBC1D16,TBC1D24,<br>TBRG4,TCP1,TEP1,T<br>IMM44,TK1,TMEM12<br>6A,TMEM41B,TMEM<br>97,TNRC6A,TOP1MT<br>,TPR,TTC1,TUBB,UB<br>AC1,UBTF,ULK1,UN<br>G,UROC1,UTRN,VPS<br>13A,WDR18,WDR26,<br>WDR81,WNT5B,ZCC<br>HC24 |     |
| Lipid<br>Metabolism,Small<br>Molecule<br>Biochemistry,Vitami<br>n And Mineral<br>Metabolism | Synthesis                 | Synthesis Of<br>Steroid   | 1.13E-09 | -1.709 | ABCG5,ABCG8,ACA<br>T2,ACLY,ACOX2,AK<br>R1D1,ATP1A1,BAAT,<br>CES1,CYP39A1,CYP<br>7A1,ELOVL6,ESRRA,<br>G6PD,HMGCR,HSD1<br>7B2,HSD3B7,IGFBP2<br>,IL18,JAK2,KITLG,KP<br>NB1,LSS,NPC1,NR1<br>H4,NR5A2,OSBPL1A,<br>POR,RAN,SERPINE2<br>,SLC27A2,SLC9A3R1<br>,SOAT2,STARD4                                                                                                                                                                                                                                                                                                                                                                                                                                                                                                                                                                                                                        | 34  |
| Organismal Survival                                                                         | Morbidity Or<br>Mortality | Morbidity Or<br>Mortality | 8.62E-11 | -1.712 | ABCB1,ABCB4,ACLY<br>,ADH4,AGPAT2,AKA<br>P9,ANXA7,AQP11,A<br>RIH2,ATG3,ATP1A1,<br>ATP1B1,BAP1,BID,BI<br>K,BLMH,CAPN2,CBL                                                                                                                                                                                                                                                                                                                                                                                                                                                                                                                                                                                                                                                                                                                                                                    | 171 |

|                                                  |        |                                     |          |        |                                                                                                                                                                                                                                                                                                                                                                                                                                                                                                                                                                                                                                                                                                                                                                                                                                                                                                                                                                                                                                                                                                                                                                                                                                                                                                        |  |
|--------------------------------------------------|--------|-------------------------------------|----------|--------|--------------------------------------------------------------------------------------------------------------------------------------------------------------------------------------------------------------------------------------------------------------------------------------------------------------------------------------------------------------------------------------------------------------------------------------------------------------------------------------------------------------------------------------------------------------------------------------------------------------------------------------------------------------------------------------------------------------------------------------------------------------------------------------------------------------------------------------------------------------------------------------------------------------------------------------------------------------------------------------------------------------------------------------------------------------------------------------------------------------------------------------------------------------------------------------------------------------------------------------------------------------------------------------------------------|--|
|                                                  |        |                                     |          |        | B,CCBE1,CD2AP,CD<br>47,CDA,CDH1,CDH2,<br>CDO1,CEBPD,CITED<br>2,CNN3,CNP,CPT1A,<br>CSRNP1,CUL4B,CXA<br>DR,CYLD,CYP7A1,D<br>CTN1,DHX9,DICER1,<br>DMD,DMTF1,DNAJB<br>1,DNAJC5,DSP,DVL1<br>,E2F5,ENDOG,ERBB<br>3,F11,F2R,F3,FADS2<br>,FECH,FGA,FGFR2,F<br>GFRL1,FGG,FH,FKB<br>P4,FLCN,FOXO3,G6<br>PD,GABARAP,GAS2<br>L3,GCLC,GNA12,GP<br>D2,GSS,HECTD3,HM<br>GCR,HNRNPC,HNR<br>NPD,HRAS,HSD17B2<br>,HSD3B7,HSPB1,ID2,<br>IGFBP2,IL18,ING4,IT<br>PA,JAK2,KAT2B,KD<br>M6A,KEAP1,KITLG,K<br>LF9,LGR5,LIN7A,LIN<br>7C,LMNA,LTBR,MAC<br>ROH2A1,MAP1LC3B,<br>MAP2K3,MAP3K7,M<br>BNL2,MCOLN1,MEF2<br>A,NCOA1,NEK7,NFK<br>BIA,NINJ1,NIPBL,NP<br>C1,NR1H4,NR3C2,N<br>R5A2,NUDT1,NUP62,<br>NUS1,OGA,PDCD2,P<br>DGFC,PDGFRB,PDLI<br>M1,PDPK1,PES1,PG<br>AP1,PIK3CA,POR,PP<br>IF,PPP1R12A,PPP1R<br>9A,PPP2R1A,PRPF1<br>9,PSEN2,PSMG1,PT<br>BP1,PTBP2,QDPR,R<br>ASA3,RB1CC1,RCAN<br>1,RICTOR,RNF14,RU<br>FY3,SCARB2,SCYL1,<br>SDC4,SEC63,SERPI<br>NA6,SERPINH1,SFR<br>P5,SLC20A1,SLC2A2<br>,SLC2A9,SLC30A10,<br>SLC39A10,SLC9A3R<br>1,SMAD7,SOD2,SPO<br>P,SPTBN1,STIP1,ST<br>K40,STXBP3,SULF2,<br>SYNE1,SYT1,TK1,TN<br>FAIP8L1,TSTA3,UBE<br>2L3,UBR1,UBTF,ULK<br>1,UNG,UROD,UTRN,<br>UXS1,WNT5B<br>AASDH,ABCB1,ABC<br>B4,ABCG2,ABCG5,A<br>BCG8,ABTB2,ACAD8<br>,ACAT2,ACLY,ACOX<br>2,ACSL3,ACSL4,ACS<br>L5,ACSM1,ACSM5,A |  |
| Cancer,Organismal<br>Injury And<br>Abnormalities | Cancer | Cancer Of<br>Secretory<br>Structure | 4.67E-26 | -1.715 | 516                                                                                                                                                                                                                                                                                                                                                                                                                                                                                                                                                                                                                                                                                                                                                                                                                                                                                                                                                                                                                                                                                                                                                                                                                                                                                                    |  |

CSS2,ACTR6,ADH4,  
AFG3L2,AGPAT2,AH  
CY,AHNAK,AKAP11,  
AKAP9,AKR1D1,ALA  
S1,ALDH1L1,ALG13,  
AMDHD1,ANKRD12,  
ANP32A,ANXA7,ARG  
LU1,ARHGAP18,ARH  
GAP21,ARHGAP6,A  
RIH2,ARL15,ARL4A,  
ARL6IP4,ASAP2,ASB  
13,ATG4D,ATP1A1,A  
TP1B1,ATP6V1D,AT  
XN2L,AUH,BAAT,BA  
P1,BDH1,BHMT,BHM  
T2,BID,BIK,BLMH,BR  
D8,C11orf54,C9orf15  
2,C9orf16,CA3,CAMK  
K2,CAPN2,CARS1,C  
BLB,CCBE1,CCDC66  
,CCT4,CCT5,CCT6A,  
CCT7,CD2AP,CD47,  
CD99L2,CDA,CDC14  
B,CDH1,CDH2,CDO1  
,CEBPD,CENPV,CES  
1,CGN,CHD6,CHPT1,  
CITED2,CLDND1,CL  
K2,CLMN,CLOCK,CM  
TM6,CMTM8,CNN3,C  
NOT4,CNOT6,CNP,C  
OL27A1,COL5A3,CO  
RO1B,CPT1A,CRIP2,  
CRLS1,CROT,CSRN  
P1,CTDSP1,CTPS2,  
CTSH,CUL4B,CXAD  
R,CYB5B,CYLD,CYP  
2U1,CYP39A1,CYP4  
F2,CYP7A1,CYTH1,D  
AZAP1,DCTN1,DDC,  
DDX60,DGKZ,DHX9,  
DIAPH2,DICER1,DIO  
1,DIPK2A,DIXDC1,D  
MD,DMTF1,DNAJB1,  
DOCK4,DPP4,DPP9,  
DSP,DSTN,DTYMK,D  
USP19,DVL1,E2F5,E  
FHD2,EGR1,EIF1AX,  
EIF4EBP1,ELF1,END  
OG,ENPP1,ERBB3,E  
SRRA,EXOC6,EXOS  
C2,F11,F3,FADS2,FA  
M102A,FAM118B,FA  
M160B1,FAM76B,FA  
M89A,FBXO31,FBXO  
9,FECH,FGA,FGB,FG  
FR2,FGFRL1,FGG,F  
H,FKBP4,FLCN,FMO  
1,FOXK1,FOXO3,FP  
GS,FTSJ3,G6PD,GA  
S2L3,GCAT,GCLC,G  
CNT2,GDA,GNA12,G  
OLGB1,GPD2,GPN1,

GRHPR,GSDMD,GS  
K3A,GSS,GSTM2,GT  
F2A2,GTF2F1,GTF3  
C2,GYG1,HECA,HEC  
TD3,HERC4,HLF,HM  
G20B,HMGCR,HNRN  
PC,HNRNPD,HOME  
R2,HOOK1,HRAS,HS  
D17B2,HSD3B7,HSP  
B1,ICK,ID2,ID4,IGFB  
P2,ING4,IRF6,IRS1,I  
TPK1,JAK2,JMJD1C,  
KAT2B,KCMF1,KDM6  
A,KEAP1,KHK,KIAA0  
100,KITLG,KLF12,KL  
F9,KLHDC2,KLHL21,  
KLHL7,KTN1,KYNU,L  
2HGDH,LARS2,LGAL  
S4,LGR5,LIN7A,LIN7  
C,LITAF,LMNA,LPIN1  
,LRIG1,LRP12,LRRC  
28,LRRC3,LSM14B,L  
SS,LTBR,MAGED1,M  
AGI3,MAP3K7,MBNL  
2,MCOLN1,MEF2A,M  
IA2,MKNK2,MLLT10,  
MLX,MMD,MOCOS,M  
ON2,MPDZ,MPP1,M  
PRIP,MRPL12,MRPL  
20,MRPS22,MRPS25  
,MRPS27,MRPS9,MT  
1F,MYO1B,MYO5B,M  
YO6,N4BP2,NAGK,N  
COA1,NDUFA12,ND  
UFA9,NEK7,NET1,NF  
KBIA,NGEF,NHLRC2,  
NINJ1,NIPBL,NME1,  
NOSIP,NPC1,NR1H4,  
NR2F6,NR5A2,NRIP1  
,NT5C,NUDT19,NUD  
T7,NUP62,NUP88,NU  
S1,OAZ1,OSBPL1A,  
OTUD6B,OXR1,PAL  
MD,PAN2,PAN3,PAQ  
R9,PCDH1,PCGF5,P  
DCD2,PDE2A,PDE9A  
,PDGFRB,PDLIM1,P  
DP2,PDPK1,PDRG1,  
PER1,PER3,PES1,P  
EX26,PEX6,PFKFB1,  
PGAP1,PHF20L1,PH  
KA2,PIK3AP1,PIK3C  
A,PKHD1,PLD1,PLX  
NA2,PMPCA,PNKD,P  
NRC1,POR,PPIF,PP  
OX,PPP1R12A,PPP1  
R1B,PPP1R3B,PPP1  
R9A,PPP2R1A,PRDX  
6,PRPF19,PRPF39,P  
RPF6,PRPS1,PRPS2  
,PSEN2,PSMA6,PSM  
D1,PSMD11,PSMD2,

PSME2,PSMF1,PSMG1,PSPC1,PSPH,PTBP1,PTBP2,PXMP4,QDPR,RAB11FIP2,RAB1B,RABGAP1L,RALI4,RALGPS2,RASA3,RASSF3,RB1CC1,RBBP5,RBBP7,RBKS,RCAN1,RCL1,REPIN1,RHBDD1,RHOD,RICTOR,RNF14,RNF14A,ROCK1,RPA1,RPIA,RUFY3,SAA4,SBF2,SCAPER,SCARB2,SCYL1,SDC4,SDR42E1,SEC63,SECISBP2L,SENP6,SERPINA6,SERPINE2,SERPINH1,SESN3,SETDB2,SFRP5,SGK2,SGTB,SH3D19,SHMT1,SHPRH,SIRT5,SLC10A1,SLC16A5,SLC1A4,SLC20A2,SLC25A32,SLC27A2,SLC2A5,SLC2A9,SLC35A3,SLC35B1,SLC35B3,SLC39A10,SLC39A8,SLC6A12,SLC9A3R1,SLK,SMAD7,SMAP1,SNAPC2,SNRNP200,SNTB1,SNX5,SNX9,SOAT2,SOD2,SPARC,SPON2,SPOP,SPTBN1,SPTBN2,ST3GAL4,STARD7,STIP1,STK40,STOM,STT3B,STX18,STX8,STXBP3,SULF2,SUMF1,SYAP1,SYNE1,SYT1,TBC1D16,TBC1D20,TBC1D24,TBRG4,TCP1,TEP1,TEX2,THAP4,TIFA,TIMM10,TIMM44,TK1,TLCD4,TLE1,TMEM126A,TMEM41A,TMEM51,TMEM62,TNFAIP2,TNFAIP8L1,TNRC6A,TOP1MT,TPR,TPRG1L,TPRKB,TRIB3,TRMT1,TSPAN33,TSTA3,TTC1,TTC19,TUBB,TUBB6,TUBGCP2,TXN2,TXNL1,UBAC1,UBE2F,UBE2L3,UBR1,UBTF,UBXN6,UCK1,UGP2,ULK1,UNG,UPP2,UROC1,UROD,USP47,UTP14A,UTRN,VPS13A,WDR18,WDR26,WDR81,WIP1,WNT5B,YPEL3,ZCCHC24,ZFAND

|                                                                               |                       |                       |          |        |                                                                                                                                                                                                                                                                                                                                                                                                                                                                                                                                                                                                                                                                                                                                                                                                                                                                                                                                                                                                                                                                                                                                                                                                                                                                                                           |     |
|-------------------------------------------------------------------------------|-----------------------|-----------------------|----------|--------|-----------------------------------------------------------------------------------------------------------------------------------------------------------------------------------------------------------------------------------------------------------------------------------------------------------------------------------------------------------------------------------------------------------------------------------------------------------------------------------------------------------------------------------------------------------------------------------------------------------------------------------------------------------------------------------------------------------------------------------------------------------------------------------------------------------------------------------------------------------------------------------------------------------------------------------------------------------------------------------------------------------------------------------------------------------------------------------------------------------------------------------------------------------------------------------------------------------------------------------------------------------------------------------------------------------|-----|
| Cancer,Hematologic<br>al<br>Disease,Organismal<br>Injury And<br>Abnormalities | Hematologic<br>Cancer | Hematologic<br>Cancer | 1.18E-05 | -1.722 | 2B,ZKSCAN1,ZNF23,<br>ZNF326,ZNF654<br>ABCB1,ABCB4,ABC<br>G2,ABCG5,ABCG8,A<br>CSL4,AHNAK,AKAP1<br>1,ALAS1,ANXA7,ASA<br>P2,ATG4D,ATP1A1,A<br>TP1B1,BAAT,BAP1,B<br>HMT,CAPN2,CBLB,C<br>CT3,CCT7,CD47,CD<br>A,CDH1,CDO1,CEBP<br>D,CHD6,CITED2,CN<br>P,COL27A1,CPT1A,C<br>TPS2,CTSH,CUL4B,<br>DAZAP1,DDC,DDX60<br>,DEK,DGKZ,DHX9,DI<br>CER1,DIO1,DIPK2A,<br>DMD,DMTF1,DNAJC<br>5,DPP4,DSP,ECHDC<br>3,EGR1,EIF4EBP1,E<br>NPP1,ERBB3,EXTL2,<br>F2R,F3,FAM102A,FB<br>XO31,FBXO9,FGFR2<br>,FGG,FOXO3,FPGS,<br>GNA12,GPD2,GRHP<br>R,GYG1,HECA,HECT<br>D3,HMG20B,HMGCR<br>,HNRNPD,HOOK1,H<br>RAS,HSPB1,ICK,ID2,<br>ID4,IL18,IRS1,JAK2,J<br>MJD1C,KDM6A,KIAA<br>0100,KITLG,KPNB1,L<br>ARS2,LGALS4,LMNA<br>,LPIN1,LRIG1,LRRC3<br>,LTBR,MAGED1,MAP<br>2K3,MEF2A,MIA2,MK<br>NK2,MLLT10,MPDZ,<br>MRPL20,MRPL44,MY<br>O5B,NET1,NFKBIA,N<br>INJ1,NIPBL,NME1,N<br>RIP1,NT5C,NUP88,O<br>SBPL1A,PALMD,PAN<br>3,PAQR9,PDE9A,PD<br>GFC,PDGFRB,PDPK<br>1,PER1,PER3,PES1,<br>PEX6,PIK3AP1,PIK3<br>CA,PKHD1,PLXNA2,<br>PNKD,PNRC1,POLE<br>4,POR,PPM1A,PPP1<br>R14B,PPP1R1B,PPP<br>1R3B,PRPF19,PRPS<br>1,PSEN2,PSMD1,PS<br>MD2,PSME2,RAN,RH<br>OD,RICTOR,RPA1,S<br>ARS1,SCARB2,SERP<br>INH1,SGK2,SHMT1,S<br>HPRH,SLC25A32,SM<br>AD7,SOAT2,SOD2,S<br>PARC,SPTBN1,STIP<br>1,STK24,STK40,SYN<br>E1,SYT1,TCIM,TEP1,<br>TPI1,TPR,TUBB6,TU | 175 |
|-------------------------------------------------------------------------------|-----------------------|-----------------------|----------|--------|-----------------------------------------------------------------------------------------------------------------------------------------------------------------------------------------------------------------------------------------------------------------------------------------------------------------------------------------------------------------------------------------------------------------------------------------------------------------------------------------------------------------------------------------------------------------------------------------------------------------------------------------------------------------------------------------------------------------------------------------------------------------------------------------------------------------------------------------------------------------------------------------------------------------------------------------------------------------------------------------------------------------------------------------------------------------------------------------------------------------------------------------------------------------------------------------------------------------------------------------------------------------------------------------------------------|-----|

|                                                                        |                                |                                |          |        |                                                                                                                                                                                                                                                                                                                                                                                                                                                                                                                                                                                                                                                                                                                                                                                                                                                                                                                                                                                                                                                |     |
|------------------------------------------------------------------------|--------------------------------|--------------------------------|----------|--------|------------------------------------------------------------------------------------------------------------------------------------------------------------------------------------------------------------------------------------------------------------------------------------------------------------------------------------------------------------------------------------------------------------------------------------------------------------------------------------------------------------------------------------------------------------------------------------------------------------------------------------------------------------------------------------------------------------------------------------------------------------------------------------------------------------------------------------------------------------------------------------------------------------------------------------------------------------------------------------------------------------------------------------------------|-----|
| Cancer,Organismal Injury And Abnormalities,Reproductive System Disease | Breast Or Gynecological Cancer | Breast Or Gynecological Cancer | 3.24E-06 | -1.731 | T4,UBE2F,UBR1,UBXN1,UGT2B10,UNG,UROC1,VPS13A<br>ABCB1,ABCB4,ABCG2,ABCG5,ACAD8,ACOX2,ACSL3,ACSL4,ACSM1,ACSS2,AGPAT2,AHNAK,AKAP11,AKAP9,ALAS1,ALDH1L1,ALG13,ANKRD12,ARHGAP21,ARHGAP6,ARIH2,ARL15,ATP1A1,AUH,BAP1,BDH1,BIK,BRD8,CAPN2,CCT3,CCT5,CCT6A,CD2AP,CD47,CD9,CD99L2,CDA,CDH1,CDH2,CDO1,CEBPD,CEES1,CGN,CLK2,CLMN,CMTM8,CNOT4,CNOT6,COL27A1,CPEB4,CPT1A,CS,CTSH,CXADR,CYLD,CYP2U1,CYP4F2,CYP7A1,DAZAP1,DCTN1,DDX60,DGKZ,DHX9,DIAPH2,DICER1,DIO1,DIPK2A,DIXDC1,DMD,DOCK4,DPP4,DPP9,DSP,DSTN,E2F5,EGR1,EIF1AX,EIF4EBP1,ELF1,ELOVL6,ENPP1,ERBB3,ESRRA,EXOC6,EXOSC2,F11,F2R,F3,FADS2,FAM160B1,FAM172A,FECH,FGA,FGFR2,FGG,FOXO3,FTSJ3,GNA12,GOLGB1,GRHPR,GSK3A,GSTM2,GYG1,HECA,HECTD3,HLF,HMGCR,HRAS,HSPB1,ICK,IGFBP2,IL18,ING4,IRF6,IRS1,ITPA,JK2,JMJD1C,KAT2B,KCMF1,KDM6A,KEAP1,KIAA0100,KLF9,KTN1,L2HGDH,LGALS4,LGR5,LMNA,LRIG1,LSM14B,MACROH2A1,MAGED1,MAGI3,MAP1LC3B,MAP2K3,MCOLN1,MEF2A,MKNK2,MON2,MPDZ,MPRIP,MRPL24,MRPL34,MRPL44,MRPS22,MRPS27,MT1F,MYO1B,MYO5B,MYO6,NCOA1,NDUFA9,NDUFB9,NEK7,NHLRC2,NIPBL,NME1,NOSIP,NPC1,NR2F6,NR3C2, | 274 |
|------------------------------------------------------------------------|--------------------------------|--------------------------------|----------|--------|------------------------------------------------------------------------------------------------------------------------------------------------------------------------------------------------------------------------------------------------------------------------------------------------------------------------------------------------------------------------------------------------------------------------------------------------------------------------------------------------------------------------------------------------------------------------------------------------------------------------------------------------------------------------------------------------------------------------------------------------------------------------------------------------------------------------------------------------------------------------------------------------------------------------------------------------------------------------------------------------------------------------------------------------|-----|

|                                             |                 |                 |          |        |                                                                                                                                                                                                                                                                                                                                                                                                                                                                                                                                                                                                                                                                                                                                                                                                                                                                                                                                                                                                                                                                                                                                                                                                                              |     |
|---------------------------------------------|-----------------|-----------------|----------|--------|------------------------------------------------------------------------------------------------------------------------------------------------------------------------------------------------------------------------------------------------------------------------------------------------------------------------------------------------------------------------------------------------------------------------------------------------------------------------------------------------------------------------------------------------------------------------------------------------------------------------------------------------------------------------------------------------------------------------------------------------------------------------------------------------------------------------------------------------------------------------------------------------------------------------------------------------------------------------------------------------------------------------------------------------------------------------------------------------------------------------------------------------------------------------------------------------------------------------------|-----|
| Cancer, Organismal Injury And Abnormalities | Lymphoid Cancer | Lymphoid Cancer | 8.05E-05 | -1.757 | NR5A2, NRIP1, NUP62, NUS1, OSBPL1A, OXR1, PALMD, PAN3, PCDH1, PCGF5, PDCD2, PDE2A, PDGFRB, PDLIM1, PDP2, PER3, PGAP1, PHF20L1, PHKA2, PIK3CA, PKHD1, PLD1, PLXNA2, PNRC1, POR, PPIF, PPP1R1B, PPP1R9A, PPP2R1A, PRPF39, PRPF6, PSM D2, PTBP1, PTBP2, RABEPK, RABGAP1L, RALGPS2, RASA3, RB1C C1, RBBP5, RBBP7, RGS2, RICTOR, RNF14, ROCK1, RPIA, SBF2, SCAPER, SCARB2, SECISBP2L, SESN3, SETDB2, SFRP5, SLC20A1, SLC20A2, SLC25A32, SLC2A2, SLC38A2, SLC39A10, SLC9A3R1, SNRNP200, SNTB1, SNX10, SOD2, SPARC, SPG21, SPOP, SPTBN1, SPTBN2, STARD7, STK24, STK40, STOM, STT3B, STX8, SYNE1, TBC1D20, TCP1, TEP1, TEX2, THRSP, TIGD2, TIMM44, TK1, TLE1, TMEM126A, TMEM97, TNFAIP2, TNRC6A, TOP1MT, TPI1, TPR, TPRG1L, TRIB3, TTC1, TUBB, TUBB6, TXNL1, UGP2, UGT2B10, UROD, USP47, UTRN, UXS1, VPS13A, WNT5B, YWHAH, ZCCHC24, ZFAND2B, ZKSCAN1, ZNF23, ZNF32<br>ABCB1, ABCG2, AHNAK, AKAP11, ANXA7, ASAP2, ATP1B1, BAP1, CBLB, CCT3, CCT7, CD47, CDH1, CDO1, CBPD, CHD6, CITED2, CNP, COL27A1, CTSH, CUL4B, DDC, DEK, DGKZ, DICER1, DIO1, DM D, DMTF1, DPP4, DSP, EGR1, EIF4EBP1, ENPP1, ERBB3, EXTL2, F2R, F3, FAM102A, FBXO31, FBXO9, FGFR2, FOXO3, FPGS, GNA12, GPD2, GRHPR, HECA, HMGCR, HRAS, HSPB1, ICK, ID2, IL18, JAK2 | 113 |
|---------------------------------------------|-----------------|-----------------|----------|--------|------------------------------------------------------------------------------------------------------------------------------------------------------------------------------------------------------------------------------------------------------------------------------------------------------------------------------------------------------------------------------------------------------------------------------------------------------------------------------------------------------------------------------------------------------------------------------------------------------------------------------------------------------------------------------------------------------------------------------------------------------------------------------------------------------------------------------------------------------------------------------------------------------------------------------------------------------------------------------------------------------------------------------------------------------------------------------------------------------------------------------------------------------------------------------------------------------------------------------|-----|



|                                             |                             |                             |          |        |                                                                                                                                                                                                                                                                                                                                                                                                                                                                                                                                                                                                                                                                                                                                                                                        |     |
|---------------------------------------------|-----------------------------|-----------------------------|----------|--------|----------------------------------------------------------------------------------------------------------------------------------------------------------------------------------------------------------------------------------------------------------------------------------------------------------------------------------------------------------------------------------------------------------------------------------------------------------------------------------------------------------------------------------------------------------------------------------------------------------------------------------------------------------------------------------------------------------------------------------------------------------------------------------------|-----|
|                                             |                             |                             |          |        | , JMJD1C, KDM6A, KIAA0100, KITLG, KPNB1, LPIN1, LRIG1, LTBR, MAGED1, MAP2K3, MEF2A, MIA2, MKNK2, MLT10, MPDZ, MRPL20, MYO5B, NFKBIA, NINJ1, NIPBL, NME1, PALMD, PDE9A, PDGFC, PDGFRB, PDPK1, PER1, PIK3CA, PLXNA2, PNKD, PNRC1, POLE4, POR, PRPF19, PRPS1, PSMD1, PSMD2, RAN, RICTOR, RPA1, SARS1, SERPINH1, SHMT1, SLC25A32, SMAD7, SOD2, SPARC, SPTBN1, STIP1, STK24, SYT1, TBC1D16, TPR, TUBB6, TUT4, UBE2F, UBR1, UNG, VPS13A                                                                                                                                                                                                                                                                                                                                                      |     |
| Cancer, Organismal Injury And Abnormalities | Breast Or Pancreatic Cancer | Breast Or Pancreatic Cancer | 7.45E-04 | -1.762 | AASDH, ABCB1, ABCB4, ABCG2, ABTB2, ACAT2, ACLY, ACSM5, ACSS2, ADH4, AGPAT2, AHNK, AKAP11, AKAP9, ALDH1L1, ALG13, ANKRD12, ANP32A, ATP1A1, AUH, BAP1, BDH1, BRD8, C9orf152, CAMKK2, CAPN2, CBLB, CCDC66, CCT3, CCT5, CCT6A, CD47, CD9, CDH1, CDH2, CDO1, CEBPD, CES1, CHD6, CLK2, CMTM8, CNOT4, CNOT6, COL27A1, COL5A3, CPEB4, CPT1A, CS, CUL4B, CXADR, CYLD, CYP2U1, DAZAP1, DCTN1, DGKZ, DHX9, DIAPH2, DICE1, DIXDC1, DMD, DOCK4, DPP4, DSP, DSTN, E2F5, EGR1, EIF1AX, EIF4EBP1, ELOVL6, ERBB3, ESRRA, EXOC6, EXOSC2, F11, F2R, F3, FADS2, FGA, FGF2, FOXO3, FTSJ3, GAS2L3, GCLC, GNA12, GOLGB1, GRHR, GSTM2, GYG1, HERC4, HMGCR, HRAS, HSPB1, IGFBP2, IL18, ING4, IRS1, ITPA, JAK2, JMJD1C, KAT2B, KDM6A, KEAP1, KIAA0100, KLF12, KLF9, LGALS4, LGR5, LMNA, LRIG1, LSM14B, LSS, MACR | 232 |

Cancer,Organismal  
Injury And  
Abnormalities

Genitourinary  
Tumor

Genitourinary  
Tumor

1.88E-12

-1.806

OH2A1,MAGI3,MAP1  
LC3B,MAP2K3,MEF2  
A,MIA2,MKNK2,MPD  
Z,MRPL24,MRPL34,  
MRPS27,MT1F,MYO  
1B,MYO5B,MYO6,NA  
GK,NDUFB9,NEK7,N  
GEF,NINJ1,NIPBL,N  
ME1,NPC1,NR3C2,N  
R5A2,NRIP1,NUS1,O  
SBPL1A,PAN2,PAQR  
9,PCDH1,PDGFRB,P  
GAP1,PHF20L1,PHK  
A2,PIK3CA,PKHD1,P  
LXNA2,PNRC1,POR,  
PPP1R1B,PPP1R9A,  
PPP2R1A,PRPF39,P  
RPF6,PRPS1,PSMD1  
,PSMD11,PSMF1,PT  
BP1,PXMP4,RABEPK  
,RABGAP1L,RASA3,  
RB1CC1,RBBP5,RG  
S2,RICTOR,RNF14,R  
OCK1,RPA1,SBF2,S  
CAPER,SEC63,SECI  
SBP2L,SERPINE2,S  
ERPINH1,SETDB2,S  
FRP5,SHPRH,SLC20  
A1,SLC20A2,SLC25A  
32,SLC2A5,SLC2A9,  
SLC9A3R1,SNRNP20  
0,SNTB1,SOD2,SPA  
RC,SPG21,SPOP,SP  
TBN1,SPTBN2,ST3G  
AL4,STARD7,STK40,  
STOM,STT3B,STX8,  
SYNE1,TCP1,TEP1,T  
EX2,THRSP,TIMM44,  
TK1,TMEM126A,TME  
M97,TNRC6A,TP1  
MT,TPI1,TPR,TRIB3,  
TTC1,TUBB,TUBB6,T  
UBGCP2,TXNL1,UG  
P2,UROD,USP47,UT  
RN,UXS1,VPS13A,W  
NT5B,YWHAH,ZFAN  
D2B,ZNF23,ZNF654  
ABCB1,ABCB4,ABC  
G2,ABCG5,ACAD8,A  
CLY,ACOX2,ACSL3,  
ACSL4,ACSM1,ACSS  
2,AFG3L2,AGPAT2,A  
HNAK,AKAP11,AKAP  
9,ALAS1,ALDH1L1,A  
LG13,ANKRD12,ARH  
GAP18,ARHGAP21,A  
RHGAP6,ARIH2,ARL  
15,ASAP2,ATP1A1,A  
TP1B1,ATP6V1D,AT  
XN2L,AUH,BAAT,BA  
P1,BDH1,BIK,BLMH,  
BRD8,CA3,CAPN2,C

398

ARS1,CBLB,CCT3,CCT5,CCT6A,CD2AP,CD47,CD9,CD99L2,CDA,CDC14B,CDH1,CDH2,CDO1,CEBPD,CES1,CGN,CHD6,CLDND1,CLK2,CLMN,CMTM8,CNOT4,CNOT6,CNP,COL27A1,COL5A3,CPEB4,CPT1A,CROT,CS,CSRNP1,CSSH,CXADR,CYLD,CYP2U1,CYP4F2,CYP7A1,CYTH1,DAZAP1,DCTN1,DDC,DDX60,DGKZ,DHX9,DIAPH2,DICER1,DIO1,DIPK2A,DIXDC1,DMD,DMTF1,DOCK4,DPP4,DUPP9,DSP,DSTN,DUSP19,DVL1,E2F5,EFHD2,EGR1,EIF1AX,EIF4EBP1,ELF1,ELOVL6,ENPP1,ERBB3,ESRRA,EXOC6,EXOSC2,EXTL2,F11,F2R,F3,FADS2,FAM160B1,FAM172A,FAM89A,FECH,FGA,FGFR2,FGFRL1,FGG,FH,FKBP4,FLCN,FOXK1,FOXO3,FTSJ3,G6PD,GABARAP,GDA,GNA12,GOLGB1,GPD2,GRHPR,GSDMD,GSK3A,GSTM2,GTF2A2,GTF3C2,GYG1,HECA,HECTD3,HLF,HMGCR,HRAS,HSDB3B7,HSPB1,ICK,IDS2,IGFBP2,IL18,ING4,IRF6,IRS1,ITPA,IAK2,JMJD1C,KAT2B,KCMF1,KDM6A,KEAP1,KIAA0100,KITLG,KLF9,KLHDC2,KLHL7,KTN1,KYNU,L2HGDH,LARS2,LGALS4,LGR5,LIN7C,LITAF,LMNA,LPIN1,LRIG1,LRP12,LRRC28,LSM14B,LSS,LTBR,MACROH2A1,MAGED1,MAGI3,MAP1LC3B,MAP2K3,MBNL2,MCOLN1,METF2A,MIA2,MKNK2,MLLT10,MLX,MMD,MOCOS,MON2,MPDZ,MPPI1,MPRIP,MRPL24,MRPL34,MRPL44,MRPS22,MRPS25,MRPS27,MT1F,MYO1B,MYO5B,MYO6,N4BP2,N

4BP2L1,NAGK,NCOA  
1,NDUFA9,NDUFB9,  
NEK7,NFKBIA,NGEF,  
NHLRC2,NINJ1,NIPB  
L,NME1,NOSIP,NPC  
1,NR2F6,NR3C2,NR5  
A2,NRIP1,NUDT7,NU  
P62,NUP88,NUS1,O  
AZ1,OSBPL1A,OTUD  
6B,OXR1,PALMD,PA  
N3,PCDH1,PCGF5,P  
DCD2,PDE2A,PDGF  
RB,PDLIM1,PDP2,PD  
PK1,PDRG1,PER1,P  
ER3,PEX6,PGAP1,P  
HF20L1,PHKA2,PIK3  
CA,PKHD1,PLD1,PL  
XNA2,PNKD,PNRC1,  
POR,PIIF,PPP1R1B,  
PPP1R3B,PPP1R9A,  
PPP2R1A,PRPF39,P  
RPF6,PSEN2,PSMA6  
,PSMD1,PSMD2,PTB  
P1,PTBP2,PXMP4,R  
AB11FIP2,RABEPK,R  
ABGAP1L,RAI14,RAL  
GPS2,RASA3,RB1CC  
1,RBBP5,RBBP7,RC  
AN1,RCL1,REPIN1,R  
GS2,RHOD,RICTOR,  
RNF14,RNF144A,RO  
CK1,RPIA,SBF2,SCA  
PER,SCARB2,SCYL1  
,SDC4,SDR42E1,SE  
C63,SECISBP2L,SEN  
P6,SERPINA6,SERPI  
NE2,SESN3,SETDB2  
,SFRP5,SHPRH,SIRT  
5,SLC16A5,SLC1A4,  
SLC20A1,SLC20A2,S  
LC25A32,SLC2A2,SL  
C2A5,SLC2A9,SLC38  
A2,SLC39A10,SLC39  
A8,SLC6A12,SLC9A3  
R1,SLK,SMAD7,SMA  
P1,SNRNP200,SNTB  
1,SNX10,SOD2,SPA  
RC,SPG21,SPOP,SP  
TBN1,SPTBN2,ST3G  
AL4,STARD7,STIP1,  
STK24,STK40,STOM,  
STT3B,STX8,STXBP  
3,SULF2,SYNE1,TBC  
1D16,TBC1D20,TBC1  
D24,TCP1,TEP1,TEX  
2,THRSP,TIFA,TIGD2  
,TIMM44,TK1,TLE1,T  
MEM126A,TMEM51,T  
MEM97,TNFAIP2,TN  
RC6A,TOP1MT,TPI1,  
TPR,TPRG1L,TRIB3,  
TRMT1,TSPAN33,TT

|                                                                                                            |                         |                         |          |        |     |                                                                                                                                                                                                                                                                                                                                                                                                                                                                                                                                                                                                                                                                                                                                                                                                                                      |  |
|------------------------------------------------------------------------------------------------------------|-------------------------|-------------------------|----------|--------|-----|--------------------------------------------------------------------------------------------------------------------------------------------------------------------------------------------------------------------------------------------------------------------------------------------------------------------------------------------------------------------------------------------------------------------------------------------------------------------------------------------------------------------------------------------------------------------------------------------------------------------------------------------------------------------------------------------------------------------------------------------------------------------------------------------------------------------------------------|--|
|                                                                                                            |                         |                         |          |        |     | C1,TUBB,TUBB6,TX<br>NL1,UBAC1,UBE2F,<br>UBR1,UGP2,UGT2B1<br>0,UROC1,UROD,USP<br>47,UTP14A,UTRN,UX<br>S1,VPS13A,WIPI2,W<br>NT5B,YPEL3,YWHA<br>H,ZCCHC24,ZFAND2<br>B,ZKSCAN1,ZNF23,Z<br>NF32,ZNF654                                                                                                                                                                                                                                                                                                                                                                                                                                                                                                                                                                                                                                    |  |
| Cancer,Hematologic<br>al<br>Disease,Immunologi<br>cal<br>Disease,Organismal<br>Injury And<br>Abnormalities | Lymphocytic<br>Cancer   | Lymphocytic<br>Cancer   | 7.99E-05 | -1.815 | 112 | ABCB1,ABCG2,AHN<br>AK,AKAP11,ANXA7,A<br>SAP2,ATP1B1,BAP1,<br>CBLB,CCT3,CCT7,C<br>D47,CDH1,CDO1,CE<br>BPD,CHD6,CITED2,C<br>NP,COL27A1,CTSH,<br>CUL4B,DDC,DEK,DG<br>KZ,DICER1,DIO1,DM<br>D,DMTF1,DPP4,DSP,<br>EGR1,EIF4EBP1,EN<br>PP1,ERBB3,EXTL2,F<br>2R,F3,FAM102A,FBX<br>O31,FBXO9,FGFR2,F<br>OXO3,FPGS,GNA12,<br>GPD2,GRHPR,HECA<br>,HMGCR,HRAS,HSP<br>B1,ICK,ID2,IL18,JAK2<br>,JMJD1C,KDM6A,KIA<br>A0100,KITLG,KPNB1,<br>LPIN1,LRIG1,LTBR,M<br>AGED1,MAP2K3,ME<br>F2A,MIA2,MKNK2,ML<br>LT10,MPDZ,MRPL20,<br>MYO5B,NFKBIA,NINJ<br>1,NIPBL,NME1,PALM<br>D,PDE9A,PDGFC,PD<br>GFRB,PDPK1,PER1,<br>PIK3CA,PLXNA2,PN<br>KD,PNRC1,POLE4,P<br>OR,PRPF19,PRPS1,<br>PSMD1,PSMD2,RAN,<br>RICTOR,RPA1,SARS<br>1,SERPINH1,SHMT1,<br>SLC25A32,SMAD7,S<br>OD2,SPARC,SPTBN<br>1,STIP1,STK24,SYT1<br>,TPR,TUBB6,TUT4,U<br>BE2F,UBR1,UNG,VP<br>S13A |  |
| Cancer,Hematologic<br>al<br>Disease,Organismal<br>Injury And<br>Abnormalities                              | Lymphocytic<br>Neoplasm | Lymphocytic<br>Neoplasm | 8,46E-05 | -1,815 | 112 | ABCB1,ABCG2,AHN<br>AK,AKAP11,ANXA7,A<br>SAP2,ATP1B1,BAP1,<br>CBLB,CCT3,CCT7,C<br>D47,CDH1,CDO1,CE<br>BPD,CHD6,CITED2,C<br>NP,COL27A1,CTSH,<br>CUL4B,DDC,DEK,DG<br>KZ,DICER1,DIO1,DM<br>D,DMTF1,DPP4,DSP,<br>EGR1,EIF4EBP1,EN<br>PP1,ERBB3,EXTL2,F                                                                                                                                                                                                                                                                                                                                                                                                                                                                                                                                                                                    |  |

|                     |                     |                     |          |        |                                                                                                                                                                                                                                                                                                                                                                                                                                                                                                                                                                                                                                                                                                                   |     |
|---------------------|---------------------|---------------------|----------|--------|-------------------------------------------------------------------------------------------------------------------------------------------------------------------------------------------------------------------------------------------------------------------------------------------------------------------------------------------------------------------------------------------------------------------------------------------------------------------------------------------------------------------------------------------------------------------------------------------------------------------------------------------------------------------------------------------------------------------|-----|
|                     |                     |                     |          |        | 2R,F3,FAM102A,FBX<br>O31,FBXO9,FGFR2,F<br>OXO3,FPGS,GNA12,<br>GPD2,GRHPR,HECA<br>,HMGCR,HRAS,HSP<br>B1,ICK,ID2,IL18,JAK2<br>,JMJD1C,KDM6A,KIA<br>A0100,KITLG,KPNB1,<br>LPIN1,LRIG1,LTBR,M<br>AGED1,MAP2K3,ME<br>F2A,MIA2,MKNK2,ML<br>LT10,MPDZ,MRPL20,<br>MYO5B,NFKBIA,NINJ<br>1,NIPBL,NME1,PALM<br>D,PDE9A,PDGFC,PD<br>GFRB,PDPK1,PER1,<br>PIK3CA,PLXNA2,PN<br>KD,PNRC1,POLE4,P<br>OR,PRPF19,PRPS1,<br>PSMD1,PSMD2,RAN,<br>RICTOR,RPA1,SARS<br>1,SERPINH1,SHMT1,<br>SLC25A32,SMAD7,S<br>OD2,SPARC,SPTBN<br>1,STIP1,STK24,SYT1<br>,TPR,TUBB6,TUT4,U<br>BE2F,UBR1,UNG,VP<br>S13A                                                                                                                                   |     |
| Organismal Survival | Organismal<br>Death | Organismal<br>Death | 5.50E-11 | -1.818 | ABCB1,ABCB4,ACLY<br>,ADH4,AGPAT2,AKA<br>P9,ANXA7,AQP11,A<br>RIH2,ATG3,ATP1A1,<br>ATP1B1,BAP1,BID,BI<br>K,BLMH,CAPN2,CBL<br>B,CCBE1,CD2AP,CD<br>47,CDA,CDH1,CDH2,<br>CDO1,CEBPD,CITED<br>2,CNN3,CNP,CPT1A,<br>CSRNP1,CUL4B,CXA<br>DR,CYLD,CYP7A1,D<br>CTN1,DHX9,DICER1,<br>DMD,DMTF1,DNAJB<br>1,DNAJC5,DSP,DVL1<br>,E2F5,ENDOG,ERBB<br>3,F11,F2R,F3,FADS2<br>,FECH,FGA,FGFR2,F<br>GFRL1,FGG,FH,FKB<br>P4,FLCN,FOXO3,G6<br>PD,GABARAP,GAS2<br>L3,GCLC,GNA12,GP<br>D2,GSS,HMGCR,HN<br>RNP,HNRPD,HRA<br>S,HSD17B2,HSD3B7,<br>HSPB1,ID2,IGFBP2,I<br>L18,ING4,ITPA,JAK2,<br>KAT2B,KDM6A,KEAP<br>1,KITLG,KLF9,LGR5,<br>LIN7A,LIN7C,LMNA,L<br>TBR,MACROH2A1,M<br>AP1LC3B,MAP2K3,M<br>AP3K7,MBNL2,MCOL<br>N1,MEF2A,NCOA1,N | 170 |

|                                                                                                              |                         |                         |          |        |                                                                                                                                                                                                                                                                                                                                                                                                                                                                  |     |
|--------------------------------------------------------------------------------------------------------------|-------------------------|-------------------------|----------|--------|------------------------------------------------------------------------------------------------------------------------------------------------------------------------------------------------------------------------------------------------------------------------------------------------------------------------------------------------------------------------------------------------------------------------------------------------------------------|-----|
|                                                                                                              |                         |                         |          |        | EK7,NFKBIA,NINJ1,NIPBL,NPC1,NR1H4,NR3C2,NR5A2,NUDT1,NUP62,NUS1,OGA,PDGCD2,PDGFC,PDGFRB,PDLIM1,PDPK1,PES1,PGAP1,PIK3CA,POR,PPIF,PPP1R12A,PPP1R9A,PPP2R1A,PRPF19,PSEN2,PSMG1,PTBP1,PTBP2,QDPR,RASA3,RB1CC1,RCAN1,RICTOR,RNF14,RUFY3,SCARB2,SCYL1,SDC4,SEC63,SERPINA6,SERPINH1,SFRP5,SLC20A1,SLC2A2,SLC2A9,SLC30A10,SLC39A10,SLC9A3R1,SMAD7,SOD2,SPOP,SPTBN1,STIP1,STK40,STXBP3,SULF2,SYNE1,SYT1,TK1,TNFAIP8L1,STA3,UBE2L3,UBR1,UBTF,ULK1,UNG,UROD,UTRN,UXS1,WN T5B |     |
| Carbohydrate Metabolism, Cellular Function And Maintenance, Molecular Transport, Small Molecule Biochemistry | Transport               | Transport Of D-Glucose  | 5.20E-07 | -1.867 | DGKZ,ENPP1,ERBB3, GSK3A,IRS1,MAP2K3,MEF2A,OGA,PDGFRB,PDPK1,PIK3CA,PP1R3B,REPIN1,ROCK1,SLC2A2,SLC2A5,SLC2A9,STXBP3,T RIB3                                                                                                                                                                                                                                                                                                                                         | 19  |
| Cancer, Gastrointestinal Disease, Organismal Injury And Abnormalities                                        | Hepatobiliary Carcinoma | Hepatobiliary Carcinoma | 8.30E-06 | -1.885 | ABCB4,ABCG8,ACLY, ACOX2,ACSS2,AHNAK,AKAP11,AKAP9,AKR1D1,AMDHD1,ANKRD12,ANXA7,ARGLU1,ARHGAP21,ARHGAP6,ASAP2,ASB13,ATP1A1,ATP1B1,ATXN2L,BAAT,BAP1,BDH1,BHMT,BUD23,CARS1,CBLB,CCT6A,CD47,CDH1,CDH2,CHD6,CIB3,CLK2,CLMN,CMTM6,CNOT4,COL27A1,COL5A3,CPEB4,CRIP2,CROT,CS,CTPS2,CUL4B,CXADR,CYP39A1,CYP7A1,CYTH1,DDC,DEK,DIA PH2,DICER1,DIPK2A,DMD,DOCK4,DPP4,DPP9,E2F5,ENPP1,ERBB3,ESRRA,EXTL2,F3,FAM160B1,FBXO9,FGA,FGB,FGFR2,FGFRL1,FGG,FLCN,F                       | 235 |

OXK1,G6PD,GAS2L3  
,GCLC,GNA12,GOLG  
B1,GPD2,GRHPR,GS  
DMD,GTf3C2,HECA,  
HLF,HMGCR,HRAS,I  
D4,IL18,IRS1,JMJD1  
C,KDM6A,KEAP1,KIA  
A0100,KLHDC2,KPN  
B1,KTN1,KYNU,LAR  
S2,LGR5,LIN7A,LMN  
A,LTBR,MACROH2A  
1,MAGI3,MAP1LC3B,  
MAP2K3,MAP3K7,M  
EF2A,MON2,MPDZ,M  
PRIP,MRNIP,MRPL2  
4,MRPS22,MYO6,NC  
ALD,NET1,NGEF,NIP  
BL,NME1,NPC1,NR1  
H4,NR2F6,NR3C2,N  
RIP1,NT5C,OSBPL1  
A,OXR1,PAN2,PAN3,  
PAQR9,PCDH1,PDE  
2A,PDGFC,PDGFRB,  
PER1,PEX26,PGAP1,  
PHF20L1,PIK3AP1,PI  
K3CA,PKHD1,PLD1,  
PLXNA2,PMPCA,PO  
R,PPM1A,PPOX,PPP  
1R1B,PPP1R9A,PPP  
2R1A,PRPF6,PSMD1  
,PSMD11,PSMD2,PS  
PH,PTBP2,RABGAP1  
L,RALGPS2,RASA3,  
RB1CC1,RBBP5,RCL  
1,RICTOR,RNF167,R  
OCK1,RUFY3,SAA4,  
SARS1,SCAPER,SD  
C4,SECISBP2L,SEN  
P6,SERPINA6,SESN  
3,SFRP5,SGK2,SGT  
B,SIRT5,SLC10A1,SL  
C1A4,SLC20A1,SLC2  
0A2,SLC2A2,SLC2A5  
,SLC35B3,SLC38A2,  
SLC39A10,SLC39A8,  
SLC6A12,SLK,SNRN  
P200,SNTB1,SNX9,S  
OAT2,SPTBN1,SPTB  
N2,STK24,STK40,SU  
LF2,SUMF1,SYNE1,T  
BC1D16,TCIM,TEP1,  
TEX2,THAP4,TIGD2,  
TIMM44,TLE1,TMEM  
219,TMEM41A,TMEM  
62,TNFAIP8L1,TNRC  
6A,TOP1MT,TPI1,TP  
R,TSN,TSPAN33,TT  
C1,TUBB,TUBGCP2,  
TXNL1,UBAC1,UBXN  
1,UBXN6,UCK1,UGP  
2,UGT2B10,UPP2,UR  
OC1,USP47,YWHAH,



|                                                                                            |                 |                 |          |        |                                                                                                                                                                                                                                                                                                                                                                                                                                                                                                                                                                                                                                                                                                                                                                                                                                                                                                                                                                                                                                                                                                                                                                                                                                                                                   |     |
|--------------------------------------------------------------------------------------------|-----------------|-----------------|----------|--------|-----------------------------------------------------------------------------------------------------------------------------------------------------------------------------------------------------------------------------------------------------------------------------------------------------------------------------------------------------------------------------------------------------------------------------------------------------------------------------------------------------------------------------------------------------------------------------------------------------------------------------------------------------------------------------------------------------------------------------------------------------------------------------------------------------------------------------------------------------------------------------------------------------------------------------------------------------------------------------------------------------------------------------------------------------------------------------------------------------------------------------------------------------------------------------------------------------------------------------------------------------------------------------------|-----|
| Cancer,Gastrointestinal Disease,Hepatic System Disease,Organismal Injury And Abnormalities | Liver Carcinoma | Liver Carcinoma | 1.04E-05 | -1.885 | ZCCHC24<br>ABCB4,ABCG8,ACLY,ACOX2,ACSS2,AHN<br>AK,AKAP9,AKR1D1,<br>AMDHD1,ANKRD12,<br>ANXA7,ARGLU1,AR<br>HGAP21,ARHGAP6,<br>ASAP2,ASB13,ATP1<br>A1,ATP1B1,ATXN2L,<br>BAP1,BDH1,BHMT,B<br>UD23,CARS1,CBLB,<br>CCT6A,CD47,CDH1,<br>CDH2,CHD6,CIB3,CL<br>K2,CLMN,CMTM6,CN<br>OT4,COL27A1,CPEB<br>4,CRIP2,CROT,CXA<br>DR,CYP39A1,CYP7A<br>1,CYTH1,DDC,DIAPH<br>2,DICER1,DIPK2A,D<br>MD,DOCK4,DPP4,DP<br>P9,E2F5,ENPP1,ERB<br>B3,ESRR,EXTL2,F3<br>,FAM160B1,FBXO9,F<br>GA,FGB,FGFR2,FGG<br>,FLCN,FOXK1,G6PD,<br>GAS2L3,GCLC,GNA1<br>2,GOLGB1,GPD2,GR<br>HPR,GSDMD,GTFC3<br>2,HECA,HLF,HMGCR<br>,HRAS,ID4,IL18,IRS1,<br>JMJD1C,KDM6A,KEA<br>P1,KIAA0100,KLHDC<br>2,KPNB1,KTN1,KYN<br>U,LARS2,LGR5,LMN<br>A,LTBR,MACROH2A<br>1,MAGI3,MAP1LC3B,<br>MAP2K3,MAP3K7,M<br>EF2A,MON2,MPDZ,M<br>PRIP,MRNIP,MRPL2<br>4,MRPS22,MYO6,NC<br>ALD,NET1,NGEF,NIP<br>BL,NME1,NPC1,NR1<br>H4,NR2F6,NR3C2,N<br>RIP1,NT5C,OSBPL1<br>A,OXR1,PAN2,PAN3,<br>PAQR9,PCDH1,PDE<br>2A,PDGFC,PDGFRB,<br>PER1,PEX26,PGAP1,<br>PHF20L1,PIK3AP1,PI<br>K3CA,PKHD1,PLD1,<br>PLXNA2,PMPCA,PO<br>R,PPM1A,PPOX,PPP<br>1R1B,PPP1R9A,PPP<br>2R1A,PRPF6,PSMD1<br>,PSMD11,PSMD2,PS<br>PH,PTBP2,RABGAP1<br>L,RALGPS2,RASA3,<br>RB1CC1,RBBP5,RCL<br>1,RICTOR,RNF167,R<br>OCK1,RUFY3,SAA4,<br>SARS1,SCAPER,SD<br>C4,SECISBP2L,SEN | 223 |
|--------------------------------------------------------------------------------------------|-----------------|-----------------|----------|--------|-----------------------------------------------------------------------------------------------------------------------------------------------------------------------------------------------------------------------------------------------------------------------------------------------------------------------------------------------------------------------------------------------------------------------------------------------------------------------------------------------------------------------------------------------------------------------------------------------------------------------------------------------------------------------------------------------------------------------------------------------------------------------------------------------------------------------------------------------------------------------------------------------------------------------------------------------------------------------------------------------------------------------------------------------------------------------------------------------------------------------------------------------------------------------------------------------------------------------------------------------------------------------------------|-----|

|                                                                                            |                          |                          |          |        |                                                                                                                                                                                                                                                                                                                                                                                                |    |
|--------------------------------------------------------------------------------------------|--------------------------|--------------------------|----------|--------|------------------------------------------------------------------------------------------------------------------------------------------------------------------------------------------------------------------------------------------------------------------------------------------------------------------------------------------------------------------------------------------------|----|
|                                                                                            |                          |                          |          |        | P6,SESN3,SFRP5,SGK2,SGTB,SIRT5,SLC10A1,SLC1A4,SLC20A2,SLC2A2,SLC2A5,SLC35B3,SLC38A2,SLC39A10,SLC39A8,SLC6A12,SLK,SNRN,P200,SNX9,SOAT2,SPTBN1,SPTBN2,STK24,STK40,SULF2,SUMF1,SYNE1,TBC1D16,TCIM,TEP1,TEX2,THAP4,TIGD2,TIMM44,TLE1,TMEM219,TMEM41A,TMEM62,TNF AIP8L1,TNRC6A,TP1MT,TPI1,TPR,TSN,TPAN33,TTC1,TUBB,TUBGCP2,TXNL1,UBAC1,UBXN1,UBXN6,UCK1,UGP2,UGT2B10,UPP2,UROC1,USP47,YWHAH,ZCCHC24 |    |
| Cancer,Gastrointestinal Disease,Hepatic System Disease,Organismal Injury And Abnormalities | Hepatocellular Carcinoma | Hepatocellular Carcinoma | 5.12E-05 | -1.885 | ABCB4,ACOX2,ACS S2,AKR1D1,ANXA7,ATP1A1,ATP1B1,BHMT,BUD23,CDH1,CYP39A1,E2F5,ERBB3,F3,FAM160B1,FGA,FGFB,FGFR2,FGG,GRHPR,HMGCR,HRAS,IL18,IRS1,KDM6A,KEAP1,LGR5,LTBR,MACROH2A1,MYO6,NME1,NR1H4,NRIP1,OXR1,PDGFC,PDGFRB,PIK3CA,POR,PRPF6,SA A4,SCAPER,SENP6,SFRP5,SIRT5,SLC10A1,SLC1A4,SOAT2,SPTBN1,SULF2,SYNE1,TCIM,TIGD2,TLE1,TMEM41A,TMEM62,TNFAIP8L1,TP1MT,TPI1,TUBB,UROC1                      | 60 |
| Lipid Metabolism,Small Molecule Biochemistry                                               | Synthesis                | Synthesis Of Lipid       | 1.95E-09 | -1.892 | ABCB1,ABCG5,ABCG8,ACAT2,ACLY,ACOX2,ACSL3,ACSL4,ACSL5,ACSM1,ACSS2,ADH4,AGPAT2,AKR1D1,ALG13,ARF3,ATP1A1,BAAT,BHMT,CAMKK2,CD9,CES1,CHPT1,CRLS1,CYP39A1,CYP4F2,CYP7A1,DGKZ,DPP4,EGR1,EIF4EBP1,ELOVL6,ESRRA,F2R,FADS2,FOXO3,G6PD,HMGCR,HOMER2,HSD17B2,HSD3B7,IGFBP2,IL1                                                                                                                             | 71 |

|                                                  |             |                             |          |        |                                                                                                                                                                                                                                                                                                                                                                                                                                                                                                                                                                                                                                                                                                                                                                                                                                                                                                                                                                                                                                                                           |     |
|--------------------------------------------------|-------------|-----------------------------|----------|--------|---------------------------------------------------------------------------------------------------------------------------------------------------------------------------------------------------------------------------------------------------------------------------------------------------------------------------------------------------------------------------------------------------------------------------------------------------------------------------------------------------------------------------------------------------------------------------------------------------------------------------------------------------------------------------------------------------------------------------------------------------------------------------------------------------------------------------------------------------------------------------------------------------------------------------------------------------------------------------------------------------------------------------------------------------------------------------|-----|
|                                                  |             |                             |          |        | 8,JAK2,KITLG,KPNB<br>1,LPIN1,LSS,NFKBIA<br>,NPC1,NR1H4,NR5A<br>2,NUS1,OSBPL1A,P<br>DGFRB,PGAP1,PIK3<br>CA,PLD1,POR,PRPF<br>19,RAN,RGS2,SERPI<br>NE2,SLC27A2,SLC9<br>A3R1,SOAT2,ST3GA<br>L4,STARD4,STARD7,<br>THRSP,TRIB3                                                                                                                                                                                                                                                                                                                                                                                                                                                                                                                                                                                                                                                                                                                                                                                                                                                  |     |
| Cancer,Organismal<br>Injury And<br>Abnormalities | Development | Development<br>Of Carcinoma | 1.39E-11 | -1.893 | AASDH,ABCB1,ABC<br>B4,ABCG5,ACAD8,A<br>CLY,ACOX2,ACSL3,<br>ACSL4,ACSM1,ACSS<br>2,ACTR6,AFG3L2,AG<br>PAT2,AHNAK,AKAP1<br>1,AKAP9,ALAS1,ALD<br>H1L1,ALG13,ANKRD<br>12,ANP32A,ANXA7,A<br>RHGAP21,ARHGAP6<br>,ARIH2,ARL15,ARL6I<br>P4,ASAP2,ASB13,AT<br>G3,ATG4D,ATXN2L,<br>AUH,BAAT,BAP1,BD<br>H1,BHMT,BRD8,BUD<br>23,C11orf54,C9orf152<br>,CAPN2,CARS1,CBL<br>B,CCDC66,CCT3,CC<br>T5,CCT6A,CCT7,CD2<br>AP,CD47,CD9,CD99L<br>2,CDC14B,CDH1,CD<br>H2,CDO1,CES1,CGN<br>,CHCHD3,CHD6,CHP<br>T1,CHRA1,CLDND1<br>,CLK2,CLMN,CLOCK,<br>CMTM6,CMTM8,CNO<br>T4,CNOT6,CNP,COL<br>27A1,COL5A3,CPEB<br>4,CPT1A,CS,CTDSP<br>1,CTPS2,CUL4B,CXA<br>DR,CYLD,CYP4F2,C<br>YP7A1,DAZAP1,DCT<br>N1,DDX60,DEK,DGK<br>Z,DHX9,DIAPH2,DIC<br>ER1,DIO1,DIPK2A,DI<br>XDC1,DMD,DMTF1,D<br>OCK4,DPP4,DPP9,D<br>SP,DSTN,DUSP19,E<br>2F5,EGR1,EIF1AX,E<br>LF1,ERBB3,ESRRA,<br>EXOC6,EXTL2,F11,F<br>2R,F3,FAM102A,FAM<br>160B1,FAM172A,FEC<br>H,FGA,FGB,FGFR2,F<br>GG,FH,FLCN,FMO1,<br>FMO5,FOXO3,FTSJ3<br>,G6PD,GAS2L3,GNA<br>12,GNG12,GOLGB1,<br>GPD2,GRHPR,GSK3<br>A,GSS,GSTM2,GTF2<br>F1,GTF3C2,GYG1,H | 384 |

ECA,HECTD3,HERC  
4,HMGCR,HNRNPC,  
HRAS,HSPB1,ICK,IG  
FBP2,IL18,ING4,IRF6  
,IRS1,ITPA,JAK2,JMJ  
D1C,KAT2B,KCMF1,  
KDM6A,KEAP1,KIAA  
0100,KITLG,KLF12,K  
LHL7,KPNB1,KTN1,K  
YNU,L2HGDH,LGR5,  
LIN7A,LMNA,LRIG1,L  
RP12,LRRC28,LRRC  
3,LSM14B,LTBR,MA  
GED1,MAGI3,MAP2K  
3,MAP3K7,MBNL2,M  
COLN1,MEF2A,MIA2,  
MKNK2,MLLT10,MLX  
,MOCOS,MON2,MPD  
Z,MPP1,MPRIIP,MRNI  
P,MRPL44,MRPS22,  
MRPS27,MRPS9,MY  
O1B,MYO5B,MYO6,N  
4BP2L1,NCOA1,NDU  
FA9,NEK7,NET1,NFK  
BIA,NGEF,NHLRC2,  
NIPBL,NME1,NOSIP,  
NPC1,NR1H4,NR2F6  
,NR3C2,NRIP1,NUDT  
1,NUDT19,NUDT7,N  
UP62,NUP88,OAZ1,  
OSBPL1A,OXR1,PAL  
MD,PAN2,PAN3,PAQ  
R9,PCDH1,PCGF5,P  
DCD2,PDE2A,PDE9A  
,PDGFC,PDGFRB,PD  
LIM1,PDP2,PDPK1,P  
ER1,PER3,PFDN2,P  
GAP1,PHF20L1,PHK  
A2,PIK3AP1,PIK3CA,  
PKHD1,PLD1,PLXNA  
2,PMPCA,PNKD,PNR  
C1,POR,PPP1R14B,  
PPP1R1B,PPP1R9A,  
PPP2R1A,PRPF19,P  
RPF39,PRPF6,PSMD  
1,PSMD2,PSMD8,PT  
BP1,PTBP2,QDPR,R  
ABEPC,RABGAP1L,R  
AI14,RALGPS2,RAS  
SF3,RB1CC1,RBBP5,  
RBBP7,RCL1,RHBD  
D1,RICTOR,ROCK1,  
RPA1,RPIA,RUFY3,S  
AA4,SARS1,SBF2,SC  
APER,SCARB2,SCYL  
1,SDC4,SEC63,SECI  
SBP2L,SEN6,SERP  
INE2,SERPINH1,SES  
N3,SETDB2,SGTB,S  
HPRH,SLC1A4,SLC2  
0A1,SLC20A2,SLC2A  
2,SLC2A9,SLC35B3,

|                                                                                               |             |                        |          |        |                                                                                                                                                                                                                                                                                                                                                                                                                                                                                                                                       |     |
|-----------------------------------------------------------------------------------------------|-------------|------------------------|----------|--------|---------------------------------------------------------------------------------------------------------------------------------------------------------------------------------------------------------------------------------------------------------------------------------------------------------------------------------------------------------------------------------------------------------------------------------------------------------------------------------------------------------------------------------------|-----|
|                                                                                               |             |                        |          |        | SLC38A2,SLC39A10,SLC39A8,SLC6A12,SLC9A3R1,SMAD7,SMAP1,SNRNP200,SNTB1,SNX10,SNX9,SOAT2,SOD2,SPARC,SPON2,SPOP,SPTBN1,SPTBN2,STARD7,STIP1,STK24,STK40,STOM,STT3B,STX8,STXBP3,SULF2,SYAP1,SYNE1,SYT1,TBC1D16,TBC1D20,TBC1D24,TBRG4,TCP1,TEP1,TEX2,TIGD2,TIMM44,TK1,TLCD4,TLE1,TMEM126A,TMEM41B,TMEM51,TMEM97,TNFAIP2,TNRC6A,TOP1MT,TPI1,TPR,TPRG1L,TRIB3, TTC1, TUBB, TUBB6, TXNL1, UBAC1, UBE2F, UBTF, UGP2, UGT2B10, ULK1, UNG, UROC1, UTP14A, UTRN, UXS1, VP S13A, WDR18, WDR26, WDR81, WIPI2, WNT5B, ZCCHC24, ZFAND2B, ZKSCAN1, ZNF32 |     |
| Lipid Metabolism, Small Molecule Biochemistry, Vitamin And Mineral Metabolism                 | Synthesis   | Synthesis Of Terpenoid | 2.90E-10 | -1.915 | ABC G5, ABC G8, ACAT2, ACLY, ACOX2, ADH4, AKR1D1, ALG13, ATP1A1, BAAT, CES1, CYP39A1, CYP7A1, EL OVL6, ESRRA, G6PD, HMGCR, HSD17B2, HSD3B7, IGFBP2, IL18, JAK2, KITLG, KPNB1, LSS, NPC1, NR1H4, NR5A2, NUS1, OSBP1A, POR, RAN, SERPIN E2, SLC27A2, SLC9A3R1, SOAT2, STARD4                                                                                                                                                                                                                                                            | 37  |
| Cancer, Gastrointestinal Disease, Hepatic System Disease, Organismal Injury And Abnormalities | Liver Tumor | Liver Tumor            | 2.32E-06 | -1.915 | ABCB4, ABCG8, ACLY, ACOX2, ACSS2, ADH4, AHNAK, AKAP11, AKAP9, AKR1D1, ALG13, AMDHD1, ANKRD12, ANXA7, ARGLU1, ARHGAP21, ARHGAP6, ASAP2, ASB13, ATP1A1, ATP1B1, ATXN2L, BAP1, BDH1, BHMT, BHMT2, BID, BUD23, CARS1, CBLB, CCT6A, CD47, CDC14B, CDH1, CDH2, CES1, CHD6, CIB3, CLK2, CLMN, CMTM6, CNOT4, COL27A1, CPEB4, CRIP2, CROT, CXADR, CYP39A1, C                                                                                                                                                                                   | 266 |

YP7A1,CYTH1,DCTN  
1,DDC,DHX9,DIAPH2  
,DICER1,DIPK2A,DM  
D,DOCK4,DPP4,DPP  
9,E2F5,EIF1AX,EIF4  
EBP1,ENPP1,ERBB3  
,ESRRA,EXTL2,F3,F  
AM160B1,FBXO9,FG  
A,FGB,FGFR2,FGG,F  
LCN,FOXK1,FPGS,G  
6PD,GABARAP,GAS  
2L3,GCLC,GNA12,G  
OLGB1,GPD2,GRHP  
R,GSDMD,GTF3C2,H  
ECA,HLF,HMGCR,H  
NRNPC,HOMER2,HR  
AS,HSD17B2,ID2,ID4  
,IGFBP2,IL18,ING4,I  
RS1,JMJD1C,KDM6A  
,KEAP1,KIAA0100,KL  
HDC2,KPNB1,KTN1,  
KYNULARS2,LGR5,  
LMNA,LTBR,MACRO  
H2A1,MAGI3,MAP1L  
C3B,MAP2K3,MAP3K  
7,MEF2A,MON2,MPD  
Z,MPRIIP,MRNIP,MR  
PL24,MRPS22,MYO6  
,NCALD,NCOA1,NET  
1,NGEF,NIPBL,NME1  
,NPC1,NR1H4,NR2F  
6,NR3C2,NR5A2,NRI  
P1,NT5C,NUDT1,NU  
P62,OSBPL1A,OXR1,  
PAN2,PAN3,PAQR9,  
PCDH1,PDE2A,PDG  
FC,PDGFRB,PDLIM1  
,PDPK1,PER1,PEX26  
,PGAP1,PHF20L1,PI  
K3AP1,PIK3CA,PKH  
D1,PLD1,PLXNA2,P  
MPCA,PNRC1,POR,  
PPM1A,PPOX,PPP1  
R12A,PPP1R1B,PPP  
1R9A,PPP2R1A,PRP  
F6,PSMD1,PSMD11,  
PSMD2,PSPC1,PSP  
H,PTBP2,RABGAP1L  
,RALGPS2,RAN,RAS  
A3,RB1CC1,RBBP5,  
RBBP7,RCL1,RHBD  
D1,RICTOR,RNF167,  
ROCK1,RPIA,RUFY3,  
SAA4,SARS1,SCAPE  
R,SCYL1,SDC4,SEC  
63,SECISBP2L,SENP  
6,SERPINE2,SESN3,  
SFRP5,SGK2,SGTB,  
SIRT5,SLC10A1,SLC  
1A4,SLC20A2,SLC2A  
2,SLC2A5,SLC35B3,  
SLC38A2,SLC39A10,

|                                                  |                        |                        |          |       |                                                                                                                                                                                                                                                                                                                                                                                                                                                                                                                                                                                                                                                                                                                                                                                                                                                             |     |
|--------------------------------------------------|------------------------|------------------------|----------|-------|-------------------------------------------------------------------------------------------------------------------------------------------------------------------------------------------------------------------------------------------------------------------------------------------------------------------------------------------------------------------------------------------------------------------------------------------------------------------------------------------------------------------------------------------------------------------------------------------------------------------------------------------------------------------------------------------------------------------------------------------------------------------------------------------------------------------------------------------------------------|-----|
|                                                  |                        |                        |          |       | SLC39A8,SLC6A12,S<br>LK,SNRNP200,SNX9,<br>SOAT2,SOD2,SPAR<br>C,SPTBN1,SPTBN2,<br>STK24,STK40,STXB<br>P3,SULF2,SUMF1,SY<br>NE1,TBC1D16,TCIM,<br>TEP1,TEX2,THAP4,T<br>IGD2,TIMM44,TLCD4<br>,TLE1,TMEM219,TM<br>EM41A,TMEM62,TNF<br>AIP8L1,TNRC6A,TO<br>P1MT,TPI1,TPR,TSN,T<br>SPAN33,TTC1,TUBB,<br>TUBGCP2,TXNL1,UB<br>AC1,UBE2F,UBXN1,<br>UBXN6,UCK1,UGP2,<br>UGT2B10,UPP2,URO<br>C1,USP47,UTRN,WI<br>PI2,WNT5B,YWHAH,<br>ZCCHC24                                                                                                                                                                                                                                                                                                                                                                                                                            |     |
| Cancer,Organismal<br>Injury And<br>Abnormalities | Abdominal<br>Carcinoma | Abdominal<br>Carcinoma | 2.84E-24 | -1.93 | AASDH,ABCB1,ABC<br>B4,ABCG2,ABCG5,A<br>BCG8,ABTB2,ACAD8<br>,ACAT2,ACLY,ACOX<br>2,ACSL3,ACSL4,ACS<br>M1,ACSM5,ACSS2,A<br>CTR6,ADH4,AFG3L2,<br>AGPAT2,AHCY,AHN<br>AK,AHSA1,AKAP11,A<br>KAP9,AKR1D1,ALAS<br>1,ALDH1L1,ALG13,A<br>MDHD1,ANKRD12,A<br>NP32A,ANXA7,ARF3,<br>ARGLU1,ARHGAP18,<br>ARHGAP21,ARHGAP<br>6,ARIH2,ARL15,ARL6<br>IP4,ARSG,ASAP2,AS<br>B13,ATG3,ATG4D,AT<br>P1A1,ATP1B1,ATP6V<br>1D,ATXN2L,AUH,BA<br>AT,BAP1,BDH1,BHM<br>T,BHMT2,BID,BIK,BL<br>MH,BRD8,BUD23,C1<br>orf54,C9orf152,CA3,<br>CAMKK2,CAPN2,CA<br>RS1,CBLB,CCBE1,C<br>CDC66,CCT3,CCT4,<br>CCT5,CCT6A,CCT7,<br>CD2AP,CD47,CD9,C<br>D99L2,CDA,CDC14B,<br>CDH1,CDH2,CDO1,C<br>EBPD,CENPV,CES1,<br>CGN,CHCHD3,CHCH<br>D4,CHD6,CHPT1,CH<br>RAC1,CIB3,CITED2,<br>CLDND1,CLK2,CLMN<br>,CLOCK,CMTM6,CM<br>TM8,CNOT4,CNOT6,<br>CNP,COL27A1,COL5<br>A3,CORO1B,CPEB4,<br>CPT1A,CRIP2,CROT, | 540 |

CS,CSRNP1,CTDSP  
1,CTPS2,CTSH,CUL4  
B,CXADR,CYLD,CYP  
2U1,CYP39A1,CYP4  
F2,CYP7A1,CYTH1,D  
AZAP1,DCTN1,DDC,  
DDX60,DEK,DGKZ,D  
HX9,DIAPH2,DICER1  
,DIO1,DIPK2A,DIXDC  
1,DMD,DMTF1,DNAJ  
C5,DOCK4,DPP4,DP  
P9,DSP,DSTN,DUSP  
19,DVL1,E2F5,ECHD  
C1,EEPD1,EFHD2,E  
GR1,EIF1AX,ELF1,E  
NPP1,ERBB3,ESRRA  
,EXOC6,EXOSC2,EX  
TL2,F11,F2R,F3,FAD  
S2,FAM102A,FAM16  
0B1,FAM172A,FAM8  
9A,FBXO9,FECH,FG  
A,FGB,FGFR2,FGFR  
L1,FGG,FH,FKBP4,F  
LCN,FMO1,FMO5,FO  
XK1,FOXO3,FPGS,F  
TSJ3,G6PD,GAS2L3,  
GCAT,GCLC,GCNT2,  
GDA,GNA12,GNG12,  
GOLGB1,GPD2,GPN  
1,GRHPR,GSDMD,G  
SK3A,GSS,GSTM2,G  
TF2A2,GTf2F1,GTf3  
C2,GYG1,HECA,HEC  
TD3,HERC4,HLF,HM  
G20B,HMGCR,HNRN  
PC,HNRNPD,HOME  
R2,HOOK1,HRAS,HS  
D17B2,HSD3B7,HSP  
B1,ICK,ID2,ID4,IGFB  
P2,IL18,ING4,IRF6,IR  
S1,ITPA,ITPK1,JAK2,  
JMJD1C,KAT2B,KCM  
F1,KDM6A,KEAP1,KI  
AA0100,KITLG,KLF1  
2,KLF9,KLHDC2,KLH  
L21,KLHL7,KPNB1,K  
TN1,KYNU,L2HGDH,  
LARS2,LGR5,LIN7A,  
LIN7C,LITAF,LMNA,L  
PIN1,LRIG1,LRP12,L  
RRC28,LRRC3,LSM1  
4B,LSS,LTBR,MACR  
OH2A1,MAGED1,MA  
GI3,MAP1LC3B,MAP  
2K3,MAP3K7,MBNL2,  
MCOLN1,MEF2A,MIA  
2,MKNK2,MLLT10,ML  
X,MMD,MOCOS,MO  
N2,MPDZ,MPP1,MPR  
IP,MRNIP,MRPL12,M  
RPL20,MRPL24,MRP  
L44,MRPS22,MRPS2



5,MRPS27,MRPS9,M  
YO1B,MYO5B,MYO6,  
N4BP2,N4BP2L1,NA  
GK,NCALD,NCOA1,N  
DUFA12,NDUFA9,NE  
K7,NET1,NFKBIA,NG  
EF,NHLRC2,NINJ1,NI  
PBL,NME1,NOSIP,N  
PC1,NR1H4,NR2F6,  
NR3C2,NR5A2,NRIP  
1,NT5C,NUDT1,NUD  
T19,NUDT7,NUP62,N  
UP88,OSBPL1A,OTU  
D6B,OXR1,PALMD,P  
AN2,PAN3,PAQR9,P  
CDH1,PCGF5,PDCD  
2,PDE2A,PDE9A,PD  
GFC,PDGFRB,PDLIM  
1,PDP2,PDPK1,PDR  
G1,PER1,PER3,PEX  
26,PEX6,PFDN2,PGA  
P1,PHF20L1,PHKA2,  
PIK3AP1,PIK3CA,PK  
HD1,PLD1,PLXNA2,P  
MPCA,PNKD,PNRC1,  
POR,PPIF,PPM1A,P  
POX,PPP1R12A,PPP  
1R14B,PPP1R1B,PP  
P1R3B,PPP1R9A,PP  
P2R1A,PRPF39,PRP  
F6,PRPS1,PSEN2,PS  
MD1,PSMD11,PSMD  
2,PSMD8,SPSC1,PS  
PH,PTBP1,PTBP2,PX  
MP4,QDPR,RAB11FI  
P2,RABEPK,RABGA  
P1L,RAI14,RALGPS2  
,RAN,RASA3,RASSF  
3,RB1CC1,RBBP5,R  
BBP7,RCAN1,RCL1,  
REPIN1,RGS2,RHBD  
D1,RHOD,RICTOR,R  
NF167,ROCK1,RPA1,  
RPIA,RUFY3,SAA4,S  
AR1B,SARS1,SBF2,S  
CAPER,SCARB2,SC  
YL1,SDC4,SDR42E1,  
SEC63,SECISBP2L,S  
ENP6,SERPINA6,SE  
RPINE2,SERPINH1,S  
ESN3,SETDB2,SFRP  
5,SGK2,SGTB,SH3D  
19,SHMT1,SHPRH,SI  
RT5,SLC10A1,SLC1A  
4,SLC20A1,SLC20A2  
,SLC25A32,SLC27A2  
,SLC2A2,SLC2A5,SL  
C2A9,SLC35B3,SLC3  
8A2,SLC39A10,SLC3  
9A8,SLC6A12,SLC9A  
3R1,SLK,SMAD7,SM  
AP1,SNAPC2,SNRN

|                                                                                |                          |                          |          |        |                                                                                                                                                                                                                                                                                                                                                                                                                                                                                                                                                                                                                                                                                                                                                                                                                                                                                     |     |
|--------------------------------------------------------------------------------|--------------------------|--------------------------|----------|--------|-------------------------------------------------------------------------------------------------------------------------------------------------------------------------------------------------------------------------------------------------------------------------------------------------------------------------------------------------------------------------------------------------------------------------------------------------------------------------------------------------------------------------------------------------------------------------------------------------------------------------------------------------------------------------------------------------------------------------------------------------------------------------------------------------------------------------------------------------------------------------------------|-----|
|                                                                                |                          |                          |          |        | P200, SNTB1, SNX10,<br>SNX9, SOAT2, SOD2,<br>SPARC, SPG21, SPO<br>P, SPTBN1, SPTBN2,<br>ST3GAL4, STARD7, S<br>TIP1, STK24, STK40, S<br>TOM, STT3B, STX8, S<br>TXBP3, SULF2, SUMF<br>1, SYAP1, SYNE1, SYT<br>1, TBC1D16, TBC1D20<br>, TBC1D24, TBRG4, TC<br>IM, TCP1, TEP1, TEX2,<br>THAP4, THRSP, TIGD<br>2, TIMM44, TK1, TLE1,<br>TMBIM1, TMEM126A,<br>TMEM219, TMEM41A,<br>TMEM41B, TMEM51,<br>TMEM62, TMEM97, T<br>NFAIP2, TNFAIP8L1, T<br>NRC6A, TOP1MT, TPI<br>1, TPR, TPRG1L, TPR<br>KB, TRIB3, TRMT1, TS<br>N, TSPAN33, TTC1, TT<br>C19, TUBB, TUBB6, TU<br>BGCP2, TXNL1, UBAC<br>1, UBE2F, UBE2L3, UB<br>R1, UBTF, UBXN1, UB<br>XN6, UCK1, UGP2, UG<br>T2B10, ULK1, UNG, UP<br>P2, UROC1, UROD, US<br>P47, UTP14A, UTRN, U<br>XS1, VPS13A, WDR18<br>, WDR26, WDR81, WIP<br>I2, WNT5B, YPEL3, YW<br>HAH, ZCCHC24, ZFAN<br>D2B, ZKSCAN1, ZNF2<br>3, ZNF32, ZNF326, ZN<br>F654 |     |
| Cancer, Gastrointestinal<br>Disease, Organismal<br>Injury And<br>Abnormalities | Digestive<br>Organ Tumor | Digestive<br>Organ Tumor | 6.58E-16 | -1.933 | AASDH, ABCB1, ABC<br>B4, ABCG2, ABCG5, A<br>BCG8, ABTB2, ACAD8<br>, ACAT2, ACLY, ACOX<br>2, ACSL4, ACSL5, ACS<br>M5, ACSS2, ACTR6, A<br>DH4, AFG3L2, AGPAT<br>2, AHCY, AHNAK, AHS<br>A1, AKAP11, AKAP9, A<br>KR1D1, ALAS1, ALDH<br>1L1, ALG13, AMDHD1,<br>ANKRD12, ANP32A, A<br>NXA7, ARF3, ARGLU1<br>, ARHGAP18, ARHGA<br>P21, ARHGAP6, ARIH<br>2, ARL6IP4, ARSG, AS<br>AP2, ASB13, ATG3, AT<br>G4D, ATP1A1, ATP1B<br>1, ATP6V1D, ATXN2L,<br>BAAT, BAP1, BDH1, B<br>HMT, BHMT2, BID, BL<br>MH, BRD8, BUD23, C1<br>orf54, C9orf152, C9orf16,<br>CAMKK2, CAPN2,                                                                                                                                                                                                                                                                                                                      | 517 |

CARS1,CBLB,CCBE1  
,CCDC66,CCT4,CCT  
5,CCT6A,CCT7,CD2  
AP,CD47,CD9,CD99L  
2,CDC14B,CDH1,CD  
H2,CDO1,CEBPD,CE  
NPV,CES1,CGN,CHC  
HD3,CHCHD4,CHD6,  
CHPT1,CHRA1,CIB  
3,CITED2,CLDND1,C  
LK2,CLMN,CLOCK,C  
MTM6,CNOT4,CNP,C  
OL27A1,COL5A3,CO  
RO1B,CPEB4,CPT1A  
,CRIP2,CROT,CS,CT  
DSP1,CTPS2,CTSH,  
CUL4B,CXADR,CYL  
D,CYP2U1,CYP39A1,  
CYP4F2,CYP7A1,CY  
TH1,DAZAP1,DCTN1  
,DDC,DDX60,DEK,D  
GKZ,DHX9,DIAPH2,D  
ICER1,DIO1,DIPK2A,  
DIXDC1,DMD,DMTF1  
,DNAJC5,DOCK4,DP  
P4,DPP9,DSP,DSTN,  
DUSP19,DVL1,E2F5,  
ECHDC1,ECHDC3,E  
EPD1,EGR1,EIF1AX,  
EIF4EBP1,ELF1,ENP  
P1,ERBB3,ESRRA,E  
XOC6,EXOSC2,EXTL  
2,F11,F2R,F3,FADS2  
,FAM102A,FAM160B  
1,FAM172A,FBXO9,F  
ECH,FGA,FGB,FGFR  
2,FGFRL1,FGG,FKB  
P4,FLCN,FMO1,FMO  
5,FOXK1,FOXO3,FP  
GS,FTSJ3,G6PD,GA  
BARAP,GAS2L3,GCA  
T,GCLC,GCNT2,GDA  
,GNA12,GNG12,GOL  
GB1,GPD2,GPN1,GR  
HPR,GSDMD,GSK3A  
,GSS,GTF2F1,GTF3  
C2,HECA,HECTD3,H  
ERC4,HLF,HMG20B,  
HMGCR,HNRNPC,H  
NRNPD,HOMER2,HO  
OK1,HRAS,HSD17B2  
,HSD3B7,HSPB1,ICK  
,ID2,ID4,IGFBP2,IL18  
,ING4,IRF6,IRS1,ITP  
K1,JAK2,JMJD1C,KA  
T2B,KCMF1,KDM6A,  
KEAP1,KIAA0100,KIT  
LG,KLF12,KLF9,KLH  
DC2,KLHL21,KLHL7,  
KPNB1,KTN1,KYNU,  
LARS2,LGALS4,LGR  
5,LIN7A,LIN7C,LMNA

,LRIG1,LRP12,LRRC  
28,LRRC3,LSM14B,L  
SS,LTBR,MACROH2  
A1,MAGED1,MAGI3,  
MAP1LC3B,MAP2K3,  
MAP3K7,MBNL2,MC  
OLN1,MEF2A,MIA2,  
MKNK2,MLLT10,MLX  
,MOCOS,MON2,MPD  
Z,MPRIIP,MRNIP,MR  
PL12,MRPL20,MRPL  
24,MRPS22,MRPS25  
,MRPS27,MRPS9,MT  
1F,MYO1B,MYO5B,M  
YO6,N4BP2,NAGK,N  
CALD,NCOA1,NDUF  
A12,NDUFA9,NEK7,  
NET1,NFKBIA,NGEF,  
NHLRC2,NINJ1,NIPB  
L,NME1,NOSIP,NPC  
1,NR1H4,NR2F6,NR3  
C2,NR5A2,NRIP1,NT  
5C,NUDT1,NUDT19,  
NUDT7,NUP62,NUP8  
8,OAZ1,OSBPL1A,O  
XR1,PALMD,PAN2,P  
AN3,PAQR9,PCDH1,  
PCGF5,PDE2A,PDE9  
A,PDGFC,PDGFRB,P  
DLIM1,PDP2,PDPK1,  
PDRG1,PER1,PER3,  
PES1,PEX26,PEX6,P  
FDN2,PGAP1,PHF20  
L1,PHKA2,PIK3AP1,  
PIK3CA,PKHD1,PLD  
1,PLXNA2,PMPCA,P  
NKD,PNRC1,POR,PP  
M1A,PPOX,PPP1R12  
A,PPP1R14B,PPP1R  
1B,PPP1R3B,PPP1R  
9A,PPP2R1A,PRDX6,  
PRPF39,PRPF6,PRP  
S1,PSMD1,PSMD11,  
PSMD2,PSMD8,PSM  
F1,PSPC1,PSPH,PT  
BP1,PTBP2,PXMP4,  
QDPR,RAB11FIP2,R  
ABGAP1L,RAI14,RAL  
GPS2,RAN,RASA3,R  
ASSF3,RB1CC1,RBB  
P5,RBBP7,RCL1,RE  
PIN1,RGS2,RHBDD1,  
RHOD,RICTOR,RNF  
167,ROCK1,RPA1,R  
PIA,RUFY3,SAA4,SA  
R1B,SARS1,SBF2,S  
CAPER,SCARB2,SC  
YL1,SDC4,SEC63,SE  
CISBP2L,SENP6,SE  
RPINA6,SERPINE2,S  
ERPINH1,SESN3,SE  
TDB2,SFRP5,SGK2,

|                                                                            |              |              |          |        |                                                                                                                                                                                                                                                                                                                                                                                                                                                                                                                                                                                                                                                                                                                                                                                                    |     |
|----------------------------------------------------------------------------|--------------|--------------|----------|--------|----------------------------------------------------------------------------------------------------------------------------------------------------------------------------------------------------------------------------------------------------------------------------------------------------------------------------------------------------------------------------------------------------------------------------------------------------------------------------------------------------------------------------------------------------------------------------------------------------------------------------------------------------------------------------------------------------------------------------------------------------------------------------------------------------|-----|
|                                                                            |              |              |          |        | SGTB,SH3D19,SHMT1,SHPRH,SIRT5,SLC10A1,SLC1A4,SLC20A1,SLC20A2,SLC27A2,SLC2A2,SLC2A5,SLC2A9,SLC30A10,SLC35B1,SLC35B3,SLC38A2,SLC39A10,SLC39A8,SLC6A12,SLC9A3R1,SLK,SMAD7,SMAP1,SNAPC2,SNRNP200,SNTB1,SNX10,SNX9,SOAT2,SOD2,SPARC,SPG21,SPON2,SPOP,SPTBN1,SPTBN2,ST3GAL4,STARD7,STIP1,STK24,STK40,STOM,STT3B,STX8,STXBP3,SULF2,SUMF1,SYAP1,SYNE1,SYT1,TBC1D16,TBC1D20,TBC1D24,TBRG4,TCIM,TCP1,TEP1,TEX2,THAP4,THRSP,TIGD2,TIMM44,TK1,TLCD4,TLE1,TMBIM1,TMEM126A,TMEM219,TMEM41A,TMEM41B,TMEM62,TMEM97,TNFAIP8L1,TNRC6A,TP1MT,TPI1,TPR,TPRKB,TRIB3,TBMT1,TSN,TSPAN33,TTC1,TTC19,TUBB,TUBB6,TUBGCP2,TXNL1,UBAC1,UBE2F,UBE2L3,UBR1,UBTF,UBXN1,UBXN6,UCK1,UGP2,UGT2B10,ULK1,UNG,UPP2,UROC1,UROD,USP47,UTP14A,UTRN,UXS1,VP13A,WDR18,WDR26,WDR81,WIP1,WNT5B,YWHAH,ZCCHC24,ZFAND2B,ZNF23,ZNF32,ZNF326,ZNF654 |     |
| Dermatological Diseases And Conditions,Organismal Injury And Abnormalities | Keratosis    | Keratosis    | 2.57E-04 | -1.939 | CDH1,CYP7A1,DSP,ENPP1,FGFR2,G6PD,HRAS,ITPA,KEAP1,LRIG1,NFKBIA,NR1H4,PIK3CA,PSEN2                                                                                                                                                                                                                                                                                                                                                                                                                                                                                                                                                                                                                                                                                                                   | 14  |
| Cancer,Gastrointestinal Disease,Organismal Injury And Abnormalities        | Colon Cancer | Colon Cancer | 1.83E-05 | -1.982 | AASDH,ABCB1,ABCG5,ACLY,ACTR6,AFG3L2,AGPAT2,AHCY,AKAP9,ALDH1L1,ALG13,ARHGAP21,ARL6IP4,ASAP2,ASB13,ATG3,ATG4D,ATXN2L,BAAT,BAP1,C11orf54,C9orf152,CARS1,CC                                                                                                                                                                                                                                                                                                                                                                                                                                                                                                                                                                                                                                            | 228 |

DC66,CCT4,CCT5,C  
CT7,CD2AP,CD99L2,  
CDH1,CDH2,CDO1,C  
ES1,CGN,CHCHD3,C  
HD6,CHPT1,CHRA  
C1,CLDND1,CLK2,CL  
MN,CLOCK,CMTM6,  
CNOT4,CNP,COL27A  
1,COL5A3,CPEB4,CP  
T1A,CS,CTDSP1,CT  
PS2,CUL4B,CYLD,C  
YP4F2,DCTN1,DDX6  
0,DHX9,DICER1,DM  
D,DMTF1,DOCK4,DS  
TN,EGR1,ELF1,ERB  
B3,ESRRA,F3,FAM16  
0B1,FGA,FGB,FGFR  
2,FLCN,FMO1,FMO5,  
G6PD,GAS2L3,GNA1  
2,GNG12,GSS,HECA  
,HECTD3,HMGCR,H  
NRNPC,HSD17B2,H  
SPB1,ICK,IGFBP2,IL  
18,IRF6,IRS1,JAK2,J  
MJD1C,KDM6A,KEA  
P1,KIAA0100,KITLG,  
KLF12,KLHL7,KPNB1  
,KTN1,LGR5,LIN7A,L  
RIG1,LRP12,LRRC3,  
MACROH2A1,MAGE  
D1,MAP3K7,MIA2,MK  
NK2,MLLT10,MLX,M  
ON2,MPRIIP,MRNIP,  
MRPS9,MT1F,MYO5  
B,MYO6,NCOA1,NEK  
7,NET1,NGEF,NHLR  
C2,NIPBL,NOSIP,NR  
3C2,NUDT19,NUDT7,  
NUP62,OSBPL1A,PA  
QR9,PCDH1,PCGF5,  
PDE9A,PDGFRB,PD  
P2,PDPK1,PER1,PF  
DN2,PGAP1,PHF20L  
1,PHKA2,PIK3AP1,PI  
K3CA,PKHD1,PLD1,  
PLXNA2,PNKD,PNR  
C1,PPP1R14B,PPP1  
R1B,PPP2R1A,PRPF  
39,PRPF6,PSMD8,PT  
BP1,QDPR,RABGAP  
1L,RASSF3,RB1CC1,  
RBBP5,RICTOR,ROC  
K1,RPA1,RUFY3,SA  
A4,SBF2,SCAPER,S  
CYL1,SEC63,SECISB  
P2L,SENP6,SESN3,S  
GK2,SHPRH,SLC1A4  
,SLC20A1,SLC20A2,  
SLC27A2,SLC2A2,SL  
C35B3,SLC38A2,SLC  
39A10,SLC39A8,SLC  
6A12,SMAD7,SMAP1

|                                                  |                      |                      |          |        |                                                                                                                                                                                                                                                                                                                                                                                                                                                                                                                                                                                                                                                                                                                                                                                                                                                                                                                                                                                    |     |
|--------------------------------------------------|----------------------|----------------------|----------|--------|------------------------------------------------------------------------------------------------------------------------------------------------------------------------------------------------------------------------------------------------------------------------------------------------------------------------------------------------------------------------------------------------------------------------------------------------------------------------------------------------------------------------------------------------------------------------------------------------------------------------------------------------------------------------------------------------------------------------------------------------------------------------------------------------------------------------------------------------------------------------------------------------------------------------------------------------------------------------------------|-----|
|                                                  |                      |                      |          |        | ,SNRNP200,SNX9,S<br>OAT2,SPOP,SPTBN1<br>,SPTBN2,STIP1,STX<br>8,SULF2,SYAP1,SYN<br>E1,SYT1,TBC1D16,T<br>BC1D24,TBRG4,TCP<br>1,TEP1,TIMM44,TK1,<br>TMEM126A,TMEM41<br>B,TMEM97,TNRC6A,<br>TOP1MT,TPR,TTC1,<br>TUBB,UBAC1,UBTF,<br>ULK1,UNG,UROC1,U<br>TRN,VPS13A,WDR18<br>,WDR26,WDR81,WN<br>T5B,ZCCHC24                                                                                                                                                                                                                                                                                                                                                                                                                                                                                                                                                                                                                                                                             |     |
| Cancer,Organismal<br>Injury And<br>Abnormalities | Anogenital<br>Cancer | Anogenital<br>Cancer | 9.09E-10 | -1.996 | ABCB1,ABCB4,ABC<br>G2,ABCG5,ACAD8,A<br>CLY,ACOX2,ACSL3,<br>ACSL4,ACSM1,ACSS<br>2,AGPAT2,AHNAK,A<br>KAP11,AKAP9,ALAS<br>1,ALDH1L1,ALG13,A<br>NKRD12,ARHGAP18,<br>ARHGAP21,ARHGAP<br>6,ARIH2,ARL15,ASA<br>P2,ATP1A1,ATP6V1<br>D,ATXN2L,AUH,BAA<br>T,BAP1,BDH1,BIK,BL<br>MH,BRD8,CA3,CAPN<br>2,CBLB,CCT3,CCT5,<br>CCT6A,CD2AP,CD47<br>,CD9,CD99L2,CDA,C<br>DH1,CDH2,CDO1,CE<br>BPD,CES1,CGN,CHD<br>6,CLDND1,CLK2,CL<br>MN,CMTM8,CNOT4,<br>CNOT6,CNP,COL27A<br>1,COL5A3,CPEB4,CP<br>T1A,CS,CSRNP1,CT<br>SH,CXADR,CYLD,CY<br>P2U1,CYP4F2,CYP7<br>A1,CYTH1,DAZAP1,<br>DCTN1,DDX60,DGKZ<br>,DHX9,DIAPH2,DICE<br>R1,DIO1,DIPK2A,DIX<br>DC1,DMD,DOCK4,D<br>PP4,DPP9,DSP,DST<br>N,E2F5,EFHD2,EGR<br>1,EIF1AX,EIF4EBP1,<br>ELF1,ELOVL6,ENPP<br>1,ERBB3,ESRRA,EX<br>OC6,EXOSC2,F11,F2<br>R,F3,FADS2,FAM160<br>B1,FAM172A,FAM89<br>A,FECH,FGA,FGFR2,<br>FGFRL1,FGG,FH,FK<br>BP4,FLCN,FOXK1,F<br>OXO3,FTSJ3,GDA,G<br>NA12,GOLGB1,GPD2<br>,GRHPR,GSDMD,GS<br>K3A,GSTM2,GTF2A2<br>,GYG1,HECA,HECTD | 358 |

3,HLF,HMGBR,HRAS  
,HSD3B7,HSPB1,ICK  
,ID2,IGFBP2,IL18,IN  
G4,IRF6,IRS1,ITPA,J  
AK2,JMJD1C,KAT2B,  
KCMF1,KDM6A,KEA  
P1,KIAA0100,KLF9,K  
TN1,L2HGDH,LARS2  
,LGALS4,LGR5,LIN7  
C,LITAF,LMNA,LRIG  
1,LRP12,LRRC28,LS  
M14B,LSS,MACROH  
2A1,MAGED1,MAGI3  
,MAP1LC3B,MAP2K3  
,MBNL2,MCOLN1,ME  
F2A,MIA2,MKNK2,ML  
LT10,MMD,MOCOS,  
MON2,MPDZ,MPRIIP,  
MRPL24,MRPL34,MR  
PL44,MRPS22,MRPS  
25,MRPS27,MT1F,M  
YO1B,MYO5B,MYO6,  
N4BP2,NCOA1,NDU  
FA9,NDUFB9,NEK7,  
NFKBIA,NHLRC2,NIP  
BL,NME1,NOSIP,NP  
C1,NR2F6,NR3C2,N  
R5A2,NRIP1,NUDT7,  
NUP62,NUP88,NUS1  
,OAZ1,OSBPL1A,OT  
UD6B,OXR1,PALMD,  
PAN3,PCDH1,PCGF5  
,PDCD2,PDE2A,PDG  
FRB,PDLIM1,PDP2,P  
DPK1,PER1,PER3,P  
EX6,PGAP1,PHF20L  
1,PHKA2,PIK3CA,PK  
HD1,PLD1,PLXNA2,P  
NRC1,POR,PPIF,PP  
P1R1B,PPP1R3B,PP  
P1R9A,PPP2R1A,PR  
PF39,PRPF6,PSEN2,  
PSMD1,PSMD2,PTB  
P1,PTBP2,PXMP4,R  
AB11FIP2,RABEPK,R  
ABGAP1L,RALGPS2,  
RASA3,RB1CC1,RBB  
P5,RBBP7,RCAN1,R  
CL1,REPIN1,RGS2,R  
HOD,RICTOR,RNF14  
,RNF144A,ROCK1,R  
PIA,SBF2,SCAPER,S  
CARB2,SCYL1,SDC4  
,SDR42E1,SECISBP2  
L,SERPINA6,SERPIN  
E2,SESN3,SETDB2,S  
FRP5,SIRT5,SLC16A  
5,SLC1A4,SLC20A1,  
SLC20A2,SLC25A32,  
SLC2A2,SLC38A2,SL  
C39A10,SLC6A12,SL  
C9A3R1,SLK,SMAP1,



|                                                  |                            |                            |          |    |                                                                                                                                                                                                                                                                                                                                                                                                                                                                                                                                                                                                                                                                                                                                                                               |     |
|--------------------------------------------------|----------------------------|----------------------------|----------|----|-------------------------------------------------------------------------------------------------------------------------------------------------------------------------------------------------------------------------------------------------------------------------------------------------------------------------------------------------------------------------------------------------------------------------------------------------------------------------------------------------------------------------------------------------------------------------------------------------------------------------------------------------------------------------------------------------------------------------------------------------------------------------------|-----|
|                                                  |                            |                            |          |    | SNRNP200,SNTB1,S<br>NX10,SOD2,SPARC,<br>SPG21,SPOP,SPTBN<br>1,SPTBN2,ST3GAL4,<br>STARD7,STK24,STK<br>40,STOM,STT3B,STX<br>8,STXBP3,SULF2,SY<br>NE1,TBC1D16,TBC1<br>D20,TBC1D24,TCP1,<br>TEP1,TEX2,THRSP,T<br>IFA,TIGD2,TIMM44,T<br>K1,TLE1,TMEM126A,<br>TMEM97,TNFAIP2,T<br>NRC6A,TOP1MT,TPI<br>1,TPR,TPRG1L,TRIB<br>3,TRMT1,TSPAN33,T<br>TC1,TUBB,TUBB6,TX<br>NL1,UBAC1,UBE2F,<br>UBR1,UGP2,UGT2B1<br>0,UROC1,UROD,USP<br>47,UTRN,UXS1,VPS1<br>3A,WNT5B,YPEL3,Y<br>WHAH,ZCCHC24,ZF<br>AND2B,ZKSCAN1,ZN<br>F23,ZNF32,ZNF654                                                                                                                                                                                                                                                   |     |
| Cancer,Organismal<br>Injury And<br>Abnormalities | Genitourinary<br>Carcinoma | Genitourinary<br>Carcinoma | 9.18E-11 | -2 | ABCB1,ABCB4,ABC<br>G2,ABCG5,ACAD8,A<br>CLY,ACOX2,ACSL3,<br>ACSL4,ACSM1,ACSS<br>2,AFG3L2,AGPAT2,A<br>HNAK,AKAP11,AKAP<br>9,ALAS1,ALDH1L1,A<br>LG13,ANKRD12,ARH<br>GAP18,ARHGAP21,A<br>RHGAP6,ARIH2,ARL<br>15,ASAP2,ATP1A1,A<br>TP6V1D,ATXN2L,AU<br>H,BAAT,BAP1,BDH1,<br>BIK,BRD8,CA3,CAPN<br>2,CARS1,CBLB,CCT<br>3,CCT5,CCT6A,CD2<br>AP,CD47,CD9,CDA,C<br>DC14B,CDH1,CDH2,<br>CDO1,CES1,CGN,CH<br>D6,CLDND1,CLK2,CL<br>MN,CMTM8,CNOT4,<br>CNOT6,CNP,COL5A3<br>,CPEB4,CPT1A,CRO<br>T,CS,CSRNP1,CTSH,<br>CXADR,CYP4F2,CYP<br>7A1,CYTH1,DAZAP1,<br>DCTN1,DDC,DDX60,<br>DGKZ,DHX9,DIAPH2,<br>DICER1,DIO1,DIPK2<br>A,DMD,DOCK4,DPP4<br>,DPP9,DSP,DSTN,D<br>USP19,EFHD2,EIF1A<br>X,ELF1,ENPP1,ERBB<br>3,ESRRA,EXOC6,EX<br>TL2,F11,F2R,F3,FAM<br>160B1,FAM172A,FA<br>M89A,FECH,FGA,FG | 346 |

FR2,FGFRL1,FGG,F  
H,FLCN,FOXK1,FOX  
O3,FTSJ3,G6PD,GD  
A,GNA12,GOLGB1,G  
PD2,GRHPR,GSDMD  
,GSK3A,GSTM2,GTF  
2A2,GTF3C2,GYG1,  
HECA,HECTD3,HLF,  
HMGCR,HRAS,HSD3  
B7,ICK,ID2,IGFBP2,I  
L18,ING4,IRF6,IRS1,I  
TPA,JAK2,JMJD1C,K  
AT2B,KCMF1,KDM6A  
,KEAP1,KIAA0100,KL  
HDC2,KLHL7,KTN1,K  
YNU,L2HGDH,LARS2  
,LGR5,LIN7C,LITAF,L  
MNA,LPIN1,LRIG1,L  
RP12,LRRC28,LSM1  
4B,LSS,MAGED1,MA  
GI3,MAP1LC3B,MAP  
2K3,MBNL2,MCOLN1  
,MEF2A,MIA2,MLLT1  
0,MMD,MOCOS,MON  
2,MPDZ,MPP1,MPRI  
P,MRPL44,MRPS22,  
MRPS25,MRPS27,M  
T1F,MYO1B,MYO5B,  
MYO6,N4BP2,N4BP2  
L1,NAGK,NCOA1,ND  
UFA9,NEK7,NFKBIA,  
NGEF,NHLRC2,NIPB  
L,NOSIP,NPC1,NR2F  
6,NR5A2,NRIP1,NUD  
T7,NUP62,NUP88,OS  
BPL1A,OTUD6B,OXR  
1,PALMD,PAN3,PCD  
H1,PCGF5,PDCD2,P  
DE2A,PDGFRB,PDLI  
M1,PDP2,PDPK1,PD  
RG1,PER1,PER3,PE  
X6,PGAP1,PHF20L1,  
PHKA2,PIK3CA,PKH  
D1,PLD1,PLXNA2,PN  
KD,PNRC1,POR,PPI  
F,PPP1R1B,PPP1R3  
B,PPP1R9A,PPP2R1  
A,PRPF6,PSEN2,PS  
MD1,PSMD2,PTBP1,  
PTBP2,PXMP4,RAB1  
1FIP2,RABEPK,RAB  
GAP1L,RAI14,RALG  
PS2,RB1CC1,RBBP5  
,RBBP7,RCAN1,RCL  
1,REPIN1,RGS2,RH  
OD,RICTOR,ROCK1,  
RPIA,SBF2,SCAPER,  
SCARB2,SCYL1,SDC  
4,SDR42E1,SEC63,S  
ECISBP2L,SENP6,S  
ERPINA6,SERPINE2,  
SESN3,SETDB2,SHP

|                                                                  |                       |                                    |          |        |                                                                                                                                                                                                                                                                                                                                                                                                                                                                                                         |     |
|------------------------------------------------------------------|-----------------------|------------------------------------|----------|--------|---------------------------------------------------------------------------------------------------------------------------------------------------------------------------------------------------------------------------------------------------------------------------------------------------------------------------------------------------------------------------------------------------------------------------------------------------------------------------------------------------------|-----|
|                                                                  |                       |                                    |          |        | RH,SLC1A4,SLC20A1,SLC20A2,SLC25A3,SLC2A2,SLC2A9,SLC38A2,SLC39A10,SLC39A8,SLC6A12,SLC9A3R1,SLK,SMAD7,SMAP1,SNRNP200,SNTB1,SNX10,SOD2,SPARC,SPOP,SPTBN1,SPTBN2,ST3GAL4,STARD7,STK24,STK40,STOM,STT3B,STX8,STXBP3,SULF2,SYNE1,TBC1D16,TBC1D20,TBC1D24,TEP1,TEX2,TIFA,TIGD2,TK1,TLE1,TMEM126A,TMEM51,TNFAIP2,TNRC6A,TP1MT,TPI1,TPR,TPRG1L,TRIB3,TRMT1,TSPAN33,TC1,TUBB,TUBB6,TXNL1,UBAC1,UBE2F,UBR1,UGP2,UGT2B10,UROC1,USP47,UTP14A,UTRN,UXS1,VPS13A,WIPI2,YPEL3,ZCCHC24,ZFAND2B,ZKSCAN1,ZNF23,ZNF32,ZNF654 |     |
| Lipid Metabolism,Molecular Transport,Small Molecule Biochemistry | Transport             | Transport Of Oleic Acid            | 8.02E-06 | -2     | ACSL3,ACSL4,ACSL5,NPC1                                                                                                                                                                                                                                                                                                                                                                                                                                                                                  | 4   |
| Lipid Metabolism,Molecular Transport,Small Molecule Biochemistry | Transport             | Transport Of Long Chain Fatty Acid | 1.05E-03 | -2     | ACSL3,ACSL4,ACSL5,CROT,NPC1                                                                                                                                                                                                                                                                                                                                                                                                                                                                             | 5   |
| Cancer,Organismal Injury And Abnormalities                       | Malignant Solid Tumor | Malignant Solid Tumor              | 8.12E-30 | -2.004 | AASDH,ABCB1,ABCB4,ABCG2,ABCG5,ABCG8,ABTB2,ACAD8,ACAT2,ACLY,ACOX2,ACSL3,ACSL4,ACSL5,ACSM1,ACSM5,ACSS2,ACTR6,ADH4,AFG3L2,AGPAT2,AHCY,AHNAK,AHSA1,AKAP11,AKAP9,AKR1D1,ALAS1,ALDH1L1,ALG13,AMDHD1,ANKRD12,ANP32A,ANXA7,ARF3,ARGLU1,ARRHGAP18,ARRHGAP21,ARRHGAP6,ARRIH2,ARRL15,ARRL4A,ARRL6IP4,ARSG,ASAP2,ASB13,ATG3,ATG4D,ATP1A1,ATP1B1,ATP6V1D,ATXN2L,AUH,BAA1T,BAP1,BDH1,BHMT,                                                                                                                            | 597 |

BHMT2,BID,BIK,BLM  
H,BRD8,BUD23,C11orf54,C9orf152,C9orf16,CA3,CAMKK2,CAPN2,CARS1,CBLB,CCBE1,CCDC66,CCT3,CCT4,CCT5,CCT6A,CCT7,CD2AP,CD47,CD9,CD99L2,CDA,CD14B,CDH1,CDH2,CDO1,CEBPD,CENPV,CES1,CGN,CHCHD3,CHCHD4,CHD6,CHPT1,CHRA1,CIB3,CITED2,CLDN1,CLK2,CLMN,CLOCK,CLTA,CMTM6,CMTM8,CNN3,CNOT4,CNOT6,CNP,COL27A1,COL5A3,CORO1B,CPEB4,CPT1A,CRIP2,CRLS1,CROT,CS,CSRNP1,CTDSP1,CTPS2,CTSH,CUL4B,CXADR,CYB5B,CYLD,CYP2U1,CYP39A1,CYP4F2,CYP7A1,CYTH1,DAZAP1,DCTN1,DDC,DDX60,DEK,DGKZ,DHX9,DIAPH2,DICER1,DIO1,DIPK2A,DIXDC1,DMMD,DMTF1,DNAJB1,DNAJC5,DOCK4,DP4,DPP9,DSP,DSTN,DTYMK,DUSP19,DVL1,E2F5,ECHDC1,ECHDC3,EEP1,EFHD2,EGR1,EIF1AX,EIF4EBP1,ELF1,ELOVL6,ENDOG,ENPP1,ERBB3,ESRRA,EXOC6,EXOSC2,EXTL2,F11,F2R,F3,FADS2,FAM102A,FAM118B,FAM160B1,FAM172A,FAM76B,FAM89A,FBXO31,FBXO9,FECH,FGA,FGFB,FGFR2,FGFR1,FGG,FH,FKBP4,FLCN,FMO1,FMO5,FOXK1,FOXO3,FPGS,FTSJ3,G6PD,GABARAP,GAS2L3,GCAT,GCLC,GCNT2,GDA,GNA12,GN12,GOLGB1,GPD2,GPN1,GRHPR,GSDMD,GSK3A,GSS,GSTM2,GTF2A2,GTF2F1,GTF3C2,GYG1,HECA,HECTD3,HERC4,HLLF,HMG20B,HMGCR,HNRNPC,HNRNP,H

OMER2,HOOK1,HRA  
S,HSD17B2,HSD3B7,  
HSPB1,ICK,ID2,ID4,I  
GFBP2,IL18,ING4,IR  
F6,IRS1,ITPA,ITPK1,  
JAK2,JMJD1C,KAT2  
B,KCMF1,KDM6A,KE  
AP1,KHK,KIAA0100,  
KITLG,KLF12,KLF9,K  
LHDC2,KLHL21,KLH  
L7,KPNB1,KTN1,KYN  
U,L2HGDH,LARS2,L  
GALS4,LGR5,LIN7A,  
LIN7C,LITAF,LMNA,L  
PIN1,LRIG1,LRP12,L  
RRC28,LRRC3,LSM1  
4B,LSS,LTBR,MACR  
OH2A1,MAGED1,MA  
GI3,MAP1LC3B,MAP  
2K3,MAP3K7,MBNL2,  
MCOLN1,MEF2A,MIA  
2,MKNK2,MLLT10,ML  
X,MMD,MOCOS,MO  
N2,MPDZ,MPP1,MPR  
IP,MRNIP,MRPL12,M  
RPL20,MRPL24,MRP  
L34,MRPL44,MRPS2  
2,MRPS25,MRPS27,  
MRPS9,MT1F,MYO1  
B,MYO5B,MYO6,N4B  
P2,N4BP2L1,NAGK,N  
CALD,NCOA1,NDUF  
A12,NDUFA9,NDUFB  
9,NEK7,NET1,NFKBI  
A,NGEF,NHLRC2,NI  
CN1,NINJ1,NIPBL,N  
ME1,NOP10,NOSIP,  
NPC1,NR1H4,NR2F6  
,NR3C2,NR5A2,NRIP  
1,NT5C,NUDT1,NUD  
T19,NUDT7,NUP62,N  
UP88,NUS1,OAZ1,O  
SBPL1A,OTUD6B,OX  
R1,PALMD,PAN2,PA  
N3,PAQR9,PCDH1,P  
CGF5,PDCD2,PDE2A  
,PDE9A,PDGFC,PDG  
FRB,PDLIM1,PDP2,P  
DPK1,PDRG1,PER1,  
PER3,PES1,PEX26,P  
EX6,PFDN2,PFKFB1,  
PGAP1,PHF20L1,PH  
KA2,PIK3AP1,PIK3C  
A,PKHD1,PLD1,PLX  
NA2,PMPCA,PNKD,P  
NRC1,POLE4,POR,P  
PIF,PPM1A,PPOX,PP  
P1R12A,PPP1R14B,  
PPP1R1B,PPP1R3B,  
PPP1R9A,PPP2R1A,  
PRDX6,PRPF19,PRP  
F39,PRPF6,PRPS1,P

RPS2, PSEN2, PSMA6  
, PSMD1, PSMD11, PS  
MD2, PSMD8, PSME2,  
PSMF1, PSMG1, PSP  
C1, PSPH, PTBP1, PT  
BP2, PXMP4, QDPR, R  
AB11FIP2, RAB1B, RA  
BEPK, RABGAP1L, RA  
I14, RALGPS2, RAN, R  
ASA3, RASSF3, RB1C  
C1, RBBP5, RBBP7, R  
BKS, RCAN1, RCL1, R  
EPIN1, RGS2, RHBDD  
1, RHOD, RICTOR, RN  
F14, RNF144A, RNF16  
7, ROCK1, RPA1, RPIA  
, RUFY3, SAA4, SAR1  
B, SARS1, SBF2, SCA  
PER, SCARB2, SCGN,  
SCOC, SCYL1, SDC4,  
SDR42E1, SEC63, SE  
CISBP2L, SENP6, SE  
RPINA6, SERPINE2, S  
ERPINH1, SESN3, SE  
TDB2, SFRP5, SGK2,  
SGTB, SH3BGRL2, SH  
3D19, SHMT1, SHPRH  
, SIRT5, SLC10A1, SLC  
16A5, SLC1A4, SLC20  
A1, SLC20A2, SLC25A  
32, SLC27A2, SLC2A2  
, SLC2A5, SLC2A9, SL  
C30A10, SLC35A3, SL  
C35B1, SLC35B3, SLC  
38A2, SLC39A10, SLC  
39A8, SLC6A12, SLC9  
A3R1, SLK, SMAD7, S  
MAP1, SNAPC2, SNR  
NP200, SNTB1, SNX1  
0, SNX5, SNX9, SOAT2  
, SOD2, SPARC, SPG2  
1, SPON2, SPOP, SPT  
BN1, SPTBN2, ST3GA  
L4, STARD4, STARD7,  
STIP1, STK24, STK40,  
STOM, STT3B, STX18,  
STX8, STXBP3, SULF  
2, SUMF1, SYAP1, SY  
NE1, SYT1, TBC1D16,  
TBC1D20, TBC1D24,  
TBRG4, TCIM, TCP1, T  
EP1, TEX2, THAP4, TH  
RSP, TIFA, TIGD2, TIM  
M10, TIMM44, TK1, TL  
CD4, TLE1, TMBIM1, T  
MEM126A, TMEM219,  
TMEM41A, TMEM41B  
, TMEM51, TMEM62, T  
MEM97, TNFAIP2, TN  
FAIP8L1, TNRC6A, TO  
P1MT, TPI1, TPR, TPR  
G1L, TPRKB, TRIB3, T

|                                                                              |                               |                               |          |        |                                                                                                                                                                                                                                                                                                                                                                                                                                                                                                                                                                                                                                                                                                                                                                                                                                                                                                                                           |     |
|------------------------------------------------------------------------------|-------------------------------|-------------------------------|----------|--------|-------------------------------------------------------------------------------------------------------------------------------------------------------------------------------------------------------------------------------------------------------------------------------------------------------------------------------------------------------------------------------------------------------------------------------------------------------------------------------------------------------------------------------------------------------------------------------------------------------------------------------------------------------------------------------------------------------------------------------------------------------------------------------------------------------------------------------------------------------------------------------------------------------------------------------------------|-----|
| Cancer,Gastrointestinal<br>Disease,Organismal<br>Injury And<br>Abnormalities | Digestive<br>System<br>Cancer | Digestive<br>System<br>Cancer | 8.01E-15 | -2.009 | RMT1,TSN,TSPAN33<br>,TSTA3,TTC1,TTC19,<br>TUBB,TUBB6,TUBG<br>CP2,TUT4,TXN2,TXN<br>L1,UBAC1,UBE2F,UB<br>E2L3,UBR1,UBTF,UB<br>XN1,UBXN6,UCK1,U<br>GP2,UGT2B10,ULK1,<br>UNG,UPP2,UROC1,U<br>ROD,USP47,UTP14A<br>,UTRN,UXS1,VPS13<br>A,WDR18,WDR26,W<br>DR81,WIP12,WNT5B,<br>YPEL3,YWHAH,ZCC<br>HC24,ZFAND2B,ZKS<br>CAN1,ZNF23,ZNF32,<br>ZNF326,ZNF654                                                                                                                                                                                                                                                                                                                                                                                                                                                                                                                                                                                        | 506 |
|                                                                              |                               |                               |          |        | AASDH,ABCB1,ABC<br>B4,ABCG2,ABCG5,A<br>BCG8,ABTB2,ACAD8<br>,ACAT2,ACLY,ACOX<br>2,ACSL4,ACSL5,ACS<br>M5,ACSS2,ACTR6,A<br>DH4,AFG3L2,AGPAT<br>2,AHCY,AHNAK,AHS<br>A1,AKAP11,AKAP9,A<br>KR1D1,ALAS1,ALDH<br>1L1,ALG13,AMDHD1,<br>ANKRD12,ANP32A,A<br>NXA7,ARF3,ARGLU1<br>,ARHGAP18,ARHGA<br>P21,ARHGAP6,ARIH<br>2,ARL6IP4,ARSG,AS<br>AP2,ASB13,ATG3,AT<br>G4D,ATP1A1,ATP1B<br>1,ATP6V1D,ATXN2L,<br>BAAT,BAP1,BDH1,B<br>HMT,BHMT2,BID,BL<br>MH,BRD8,BUD23,C1<br>1orf54,C9orf152,CAM<br>KK2,CAPN2,CARS1,<br>CBLB,CCBE1,CCDC<br>66,CCT4,CCT5,CCT6<br>A,CCT7,CD2AP,CD4<br>7,CD9,CD99L2,CDH1<br>,CDH2,CDO1,CEBPD<br>,CENPV,CES1,CGN,<br>CHCHD3,CHCHD4,C<br>HD6,CHPT1,CHRA<br>C1,CIB3,CITED2,CLDN<br>D1,CLK2,CLMN,CLO<br>CK,CMTM6,CNOT4,C<br>NP,COL27A1,COL5A<br>3,CORO1B,CPEB4,C<br>PT1A,CRIP2,CROT,C<br>S,CTDSP1,CTPS2,C<br>TSH,CUL4B,CXADR,<br>CYLD,CYP2U1,CYP3<br>9A1,CYP4F2,CYP7A<br>1,CYTH1,DAZAP1,D<br>CTN1,DDC,DDX60,D<br>EK,DGKZ,DHX9,DIA |     |

PH2,DICER1,DIO1,DI  
PK2A,DIXDC1,DMD,  
DMTF1,DNAJC5,DO  
CK4,DPP4,DPP9,DS  
P,DSTN,DUSP19,DV  
L1,E2F5,ECHDC1,EE  
PD1,EGR1,EIF1AX,EI  
F4EBP1,ELF1,ENPP  
1,ERBB3,ESRRA,EX  
OC6,EXOSC2,EXTL2  
,F11,F2R,F3,FADS2,  
FAM102A,FAM160B1  
,FAM172A,FBXO9,FE  
CH,FGA,FGB,FGFR2  
,FGFRL1,FGG,FKBP  
4,FLCN,FMO1,FMO5,  
FOXK1,FOXO3,FPG  
S,FTSJ3,G6PD,GAS2  
L3,GCAT,GCLC,GCN  
T2,GDA,GNA12,GNG  
12,GOLGB1,GPD2,G  
PN1,GRHPR,GSDMD  
,GSK3A,GSS,GTTF2F  
1,GTTF3C2,HECA,HE  
CTD3,HERC4,HLF,H  
MG20B,HMGCR,HNR  
NPC,HNRNP,HOME  
R2,HOOK1,HRAS,H  
SD17B2,HSD3B7,HS  
PB1,ICK,ID2,ID4,IGF  
BP2,IL18,ING4,IRF6,I  
RS1,ITPK1,JAK2,JMJ  
D1C,KAT2B,KCMF1,  
KDM6A,KEAP1,KIAA  
0100,KITLG,KLF12,K  
LF9,KLHDC2,KLHL21  
,KLHL7,KPNB1,KTN1  
,KYNU,LARS2,LGAL  
S4,LGR5,LIN7A,LIN7  
C,LMNA,LRIG1,LRP1  
2,LRRC28,LRRC3,LS  
M14B,LSS,LTBR,MA  
CROH2A1,MAGED1,  
MAGI3,MAP1LC3B,M  
AP2K3,MAP3K7,MBN  
L2,MCOLN1,MEF2A,  
MIA2,MKNK2,MLLT1  
0,MLX,MOCOS,MON  
2,MPDZ,MPRIIP,MRN  
IP,MRPL12,MRPL20,  
MRPL24,MRPS22,M  
RPS25,MRPS27,MR  
PS9,MT1F,MYO1B,M  
YO5B,MYO6,N4BP2,  
NAGK,NCALD,NCOA  
1,NDUFA12,NDUFA9  
,NEK7,NET1,NFKBIA,  
NGEF,NHLRC2,NINJ  
1,NIPBL,NME1,NOSI  
P,NPC1,NR1H4,NR2  
F6,NR3C2,NR5A2,N  
RIP1,NT5C,NUDT1,N



UDT19,NUDT7,NUP6  
2,NUP88,OAZ1,OSB  
PL1A,OXR1,PALMD,  
PAN2,PAN3,PAQR9,  
PCDH1,PCGF5,PDE2  
A,PDE9A,PDGFC,PD  
GFRB,PDLIM1,PDP2,  
PDPK1,PDRG1,PER1  
,PER3,PES1,PEX26,  
PEX6,PFDN2,PGAP1  
,PHF20L1,PHKA2,PI  
K3AP1,PIK3CA,PKH  
D1,PLD1,PLXNA2,P  
MPCA,PNKD,PNRC1,  
POR,PPM1A,PPOX,P  
PP1R12A,PPP1R14B  
,PPP1R1B,PPP1R3B,  
PPP1R9A,PPP2R1A,  
PRPF39,PRPF6,PRP  
S1,PSMD1,PSMD11,  
PSMD2,PSMD8,PSM  
F1,PSPC1,PSPH,PT  
BP1,PTBP2,PXMP4,  
QDPR,RAB11FIP2,R  
ABGAP1L,RAI14,RAL  
GPS2,RAN,RASA3,R  
ASSF3,RB1CC1,RBB  
P5,RBBP7,RCL1,RE  
PIN1,RGS2,RHBDD1,  
RICTOR,RNF167,RO  
CK1,RPA1,RUFY3,S  
AA4,SAR1B,SARS1,  
SBF2,SCAPER,SCA  
RB2,SCYL1,SDC4,S  
EC63,SECISBP2L,SE  
NP6,SERPINA6,SER  
PINE2,SERPINH1,SE  
SN3,SETDB2,SFRP5,  
SGK2,SGTB,SH3D19  
,SHMT1,SHPRH,SIR  
T5,SLC10A1,SLC1A4  
,SLC20A1,SLC20A2,  
SLC27A2,SLC2A2,SL  
C2A5,SLC2A9,SLC35  
B3,SLC38A2,SLC39A  
10,SLC39A8,SLC6A1  
2,SLC9A3R1,SLK,SM  
AD7,SMAP1,SNAPC2  
,SNRNP200,SNTB1,S  
NX10,SNX9,SOAT2,S  
OD2,SPARC,SPG21,  
SPON2,SPOP,SPTB  
N1,SPTBN2,ST3GAL  
4,STARD7,STIP1,ST  
K24,STK40,STOM,ST  
T3B,STX8,STXBP3,S  
ULF2,SUMF1,SYAP1,  
SYNE1,SYT1,TBC1D  
16,TBC1D20,TBC1D2  
4,TBRG4,TCIM,TCP1  
,TEP1,TEX2,THAP4,  
THRSP,TIGD2,TIMM

|                                                  |                      |                      |          |        |                                                                                                                                                                                                                                                                                                                                                                                                                                                                                                                                                                                                                                                                                                                                                                                                                                          |     |
|--------------------------------------------------|----------------------|----------------------|----------|--------|------------------------------------------------------------------------------------------------------------------------------------------------------------------------------------------------------------------------------------------------------------------------------------------------------------------------------------------------------------------------------------------------------------------------------------------------------------------------------------------------------------------------------------------------------------------------------------------------------------------------------------------------------------------------------------------------------------------------------------------------------------------------------------------------------------------------------------------|-----|
|                                                  |                      |                      |          |        | 44,TK1,TLE1,TMBIM<br>1,TMEM126A,TMEM2<br>19,TMEM41A,TMEM4<br>1B,TMEM62,TMEM97<br>,TNFAIP8L1,TNRC6A<br>,TOP1MT,TPI1,TPR,T<br>PRKB,TRIB3,TRMT1,<br>TSN,TSPAN33,TTC1,<br>TTC19,TUBB,TUBB6,<br>TUBGCP2,TXNL1,UB<br>AC1,UBE2L3,UBR1,U<br>BTF,UBXN1,UBXN6,<br>UCK1,UGP2,UGT2B1<br>0,ULK1,UNG,UPP2,U<br>ROC1,UROD,USP47,<br>UTP14A,UTRN,UXS1<br>,VPS13A,WDR18,WD<br>R26,WDR81,WIP12,W<br>NT5B,YWHAH,ZCCH<br>C24,ZFAND2B,ZNF2<br>3,ZNF32,ZNF326,ZN<br>F654                                                                                                                                                                                                                                                                                                                                                                                       |     |
| Cancer,Organismal<br>Injury And<br>Abnormalities | Urogenital<br>Cancer | Urogenital<br>Cancer | 6.45E-12 | -2.015 | ABCB1,ABCB4,ABC<br>G2,ABCG5,ACAD8,A<br>CLY,ACOX2,ACSL3,<br>ACSL4,ACSM1,ACSS<br>2,AFG3L2,AGPAT2,A<br>HNAK,AKAP11,AKAP<br>9,ALAS1,ALDH1L1,A<br>LG13,ANKRD12,ARH<br>GAP18,ARHGAP21,A<br>RHGAP6,ARIH2,ARL<br>15,ASAP2,ATP1A1,A<br>TP1B1,ATP6V1D,AT<br>XN2L,AUH,BAAT,BA<br>P1,BDH1,BIK,BLMH,<br>BRD8,CA3,CAPN2,C<br>ARS1,CBLB,CCT3,C<br>CT5,CCT6A,CD2AP,<br>CD47,CD9,CD99L2,C<br>DA,CDC14B,CDH1,C<br>DH2,CDO1,CEBPD,C<br>ES1,CGN,CHD6,CLD<br>ND1,CLK2,CLMN,CM<br>TM8,CNOT4,CNOT6,<br>CNP,COL27A1,COL5<br>A3,CPEB4,CPT1A,C<br>ROT,CS,CSRNP1,CT<br>SH,CXADR,CYLD,CY<br>P2U1,CYP4F2,CYP7<br>A1,CYTH1,DAZAP1,<br>DCTN1,DDC,DDX60,<br>DGKZ,DHX9,DIAPH2,<br>DICER1,DIO1,DIPK2<br>A,DIXDC1,DMD,DOC<br>K4,DPP4,DPP9,DSP,<br>DSTN,DUSP19,E2F5,<br>EFHD2,EGR1,EIF1A<br>X,EIF4EBP1,ELF1,EL<br>OVL6,ENPP1,ERBB3<br>,ESRRA,EXOC6,EXO<br>SC2,EXTL2,F11,F2R, | 390 |

F3,FADS2,FAM160B  
1,FAM172A,FAM89A,  
FECH,FGA,FGFR2,F  
GFRL1,FGG,FH,FKB  
P4,FLCN,FO XK1,FO  
XO3,FTSJ3,G6PD,G  
ABARAP,GDA,GNA1  
2,GOLGB1,GPD2,GR  
HPR,GSDMD,GSK3A  
,GSTM2,GTF2A2,GT  
F3C2,GYG1,HECA,H  
ECTD3,HLF,HMGCR,  
HRAS,HSD3B7,HSP  
B1,ICK,ID2,IGFBP2,I  
L18,ING4,IRF6,IRS1,I  
TPA,JAK2,JMJD1C,K  
AT2B,KCMF1,KDM6A  
,KEAP1,KIAA0100,KL  
F9,KLHDC2,KLHL7,K  
TN1,KYNU,L2HGDH,  
LARS2,LGALS4,LGR  
5,LIN7C,LITAF,LMNA  
,LPIN1,LRIG1,LRP12,  
LRRC28,LSM14B,LS  
S,MACROH2A1,MAG  
ED1,MAGI3,MAP1LC  
3B,MAP2K3,MBNL2,  
MCOLN1,MEF2A,MIA  
2,MKKN2,MLLT10,M  
MD,MOCOS,MON2,M  
PDZ,MPP1,MPRIP,M  
RPL24,MRPL34,MRP  
L44,MRPS22,MRPS2  
5,MRPS27,MT1F,MY  
O1B,MYO5B,MYO6,N  
4BP2,N4BP2L1,NAG  
K,NCOA1,NDUFA9,N  
DUFB9,NEK7,NFKBI  
A,NGEF,NHLRC2,NI  
NJ1,NIPBL,NME1,NO  
SIP,NPC1,NR2F6,NR  
3C2,NR5A2,NRIP1,N  
UDT7,NUP62,NUP88,  
NUS1,OAZ1,OSBPL1  
A,OTUD6B,OXR1,PA  
LMD,PAN3,PCDH1,P  
CGF5,PDCD2,PDE2A  
,PDGFRB,PDLIM1,P  
DP2,PDPK1,PDRG1,  
PER1,PER3,PEX6,P  
GAP1,PHF20L1,PHK  
A2,PIK3CA,PKHD1,P  
LD1,PLXNA2,PNKD,  
PNRC1,POR,PPIF,P  
PP1R1B,PPP1R3B,P  
PP1R9A,PPP2R1A,P  
RPF39,PRPF6,PSEN  
2,PSMD1,PSMD2,PT  
BP1,PTBP2,PXMP4,  
RAB11FIP2,RABEPK,  
RABGAP1L,RAI14,R  
ALGPS2,RASA3,RB1

|                                                  |                                           |                                           |          |        |                                                                                                                                                                                                                                                                                                                                                                                                                                                                                                                                                                                                                                                                                                                                                                                                                                                                                                                                          |     |
|--------------------------------------------------|-------------------------------------------|-------------------------------------------|----------|--------|------------------------------------------------------------------------------------------------------------------------------------------------------------------------------------------------------------------------------------------------------------------------------------------------------------------------------------------------------------------------------------------------------------------------------------------------------------------------------------------------------------------------------------------------------------------------------------------------------------------------------------------------------------------------------------------------------------------------------------------------------------------------------------------------------------------------------------------------------------------------------------------------------------------------------------------|-----|
|                                                  |                                           |                                           |          |        | CC1,RBBP5,RBBP7,<br>RCAN1,RCL1,REPIN<br>1,RGS2,RHOD,RICT<br>OR,RNF14,RNF144A,<br>ROCK1,RPIA,SBF2,S<br>CAPER,SCARB2,SC<br>YL1,SDC4,SDR42E1,<br>SEC63,SECISBP2L,S<br>ENP6,SERPINA6,SE<br>RPINE2,SESN3,SET<br>DB2,SFRP5,SHPRH,<br>SIRT5,SLC16A5,SLC<br>1A4,SLC20A1,SLC20<br>A2,SLC25A32,SLC2A<br>2,SLC2A9,SLC38A2,<br>SLC39A10,SLC39A8,<br>SLC6A12,SLC9A3R1,<br>SLK,SMAD7,SMAP1,<br>SNRNP200,SNTB1,S<br>NX10,SOD2,SPARC,<br>SPG21,SPOP,SPTBN<br>1,SPTBN2,ST3GAL4,<br>STARD7,STK24,STK<br>40,STOM,STT3B,STX<br>8,STXBP3,SULF2,SY<br>NE1,TBC1D16,TBC1<br>D20,TBC1D24,TCP1,<br>TEP1,TEX2,THRSP,T<br>IFA,TIGD2,TIMM44,T<br>K1,TLE1,TMEM126A,<br>TMEM51,TMEM97,T<br>NFAIP2,TNRC6A,TO<br>P1MT,TPI1,TPR,TPR<br>G1L,TRIB3,TRMT1,T<br>SPAN33,TTC1,TUBB,<br>TUBB6,TXNL1,UBAC<br>1,UBE2F,UBR1,UGP<br>2,UGT2B10,UROC1,<br>UROD,USP47,UTP14<br>A,UTRN,UXS1,VPS1<br>3A,WIPI2,WNT5B,YP<br>EL3,YWHAH,ZCCHC<br>24,ZFAND2B,ZKSCA<br>N1,ZNF23,ZNF32,ZN<br>F654 |     |
| Cancer,Organismal<br>Injury And<br>Abnormalities | Malignant<br>Genitourinary<br>Solid Tumor | Malignant<br>Genitourinary<br>Solid Tumor | 1.07E-11 | -2.015 | ABCB1,ABCB4,ABC<br>G2,ABCG5,ACAD8,A<br>CLY,ACOX2,ACSL3,<br>ACSL4,ACSM1,ACSS<br>2,AFG3L2,AGPAT2,A<br>HNAK,AKAP11,AKAP<br>9,ALAS1,ALDH1L1,A<br>LG13,ANKRD12,ARH<br>GAP18,ARHGAP21,A<br>RHGAP6,ARIH2,ARL<br>15,ASAP2,ATP1A1,A<br>TP1B1,ATP6V1D,AT<br>XN2L,AUH,BAAT,BA<br>P1,BDH1,BIK,BRD8,<br>CA3,CAPN2,CARS1,<br>CBLB,CCT3,CCT5,C<br>CT6A,CD2AP,CD47,                                                                                                                                                                                                                                                                                                                                                                                                                                                                                                                                                                                      | 389 |

CD9,CD99L2,CDA,C  
DC14B,CDH1,CDH2,  
CDO1,CEBPD,CES1,  
CGN,CHD6,CLDND1,  
CLK2,CLMN,CMTM8,  
CNOT4,CNOT6,CNP,  
COL27A1,COL5A3,C  
PEB4,CPT1A,CROT,  
CS,CSRNP1,CTSH,C  
XADR,CYLD,CYP2U1  
,CYP4F2,CYP7A1,CY  
TH1,DAZAP1,DCTN1  
,DDC,DDX60,DGKZ,  
DHX9,DIAPH2,DICE  
R1,DIO1,DIPK2A,DIX  
DC1,DMD,DOCK4,D  
PP4,DPP9,DSP,DST  
N,DUSP19,E2F5,EFH  
D2,EGR1,EIF1AX,EIF  
4EBP1,ELF1,ELOVL6  
,ENPP1,ERBB3,ESR  
RA,EXOC6,EXOSC2,  
EXTL2,F11,F2R,F3,F  
ADS2,FAM160B1,FA  
M172A,FAM89A,FEC  
H,FGA,FGFR2,FGFR  
L1,FGG,FH,FKBP4,F  
LCN,FOXK1,FOXO3,  
FTSJ3,G6PD,GABAR  
AP,GDA,GNA12,GOL  
GB1,GPD2,GRHRP,  
GSDMD,GSK3A,GST  
M2,GTF2A2,GTF3C2,  
GYG1,HECA,HECTD  
3,HLF,HMGCR,HRAS  
,HSD3B7,HSPB1,ICK  
,ID2,IGFBP2,IL18,IN  
G4,IRF6,IRS1,ITPA,J  
AK2,JMJD1C,KAT2B,  
KCMF1,KDM6A,KEA  
P1,KIAA0100,KLF9,K  
LHDC2,KLHL7,KTN1,  
KYNU,L2HGDH,LAR  
S2,LGALS4,LGR5,LI  
N7C,LITAF,LMNA,LPI  
N1,LRIG1,LRP12,LR  
RC28,LSM14B,LSS,  
MACROH2A1,MAGE  
D1,MAGI3,MAP1LC3  
B,MAP2K3,MBNL2,M  
COLN1,MEF2A,MIA2,  
MKNK2,MLLT10,MM  
D,MOCOS,MON2,MP  
DZ,MPP1,MPRIIP,MR  
PL24,MRPL34,MRPL  
44,MRPS22,MRPS25  
,MRPS27,MT1F,MYO  
1B,MYO5B,MYO6,N4  
BP2,N4BP2L1,NAGK,  
NCOA1,NDUFA9,ND  
UFB9,NEK7,NFKBIA,  
NGEF,NHLRC2,NINJ

1,NIPBL,NME1,NOSI  
P,NPC1,NR2F6,NR3  
C2,NR5A2,NRIP1,NU  
DT7,NUP62,NUP88,N  
US1,OAZ1,OSBPL1A  
,OTUD6B,OXR1,PAL  
MD,PAN3,PCDH1,PC  
GF5,PDCD2,PDE2A,  
PDGFRB,PDLIM1,PD  
P2,PDPK1,PDRG1,P  
ER1,PER3,PEX6,PG  
AP1,PHF20L1,PHKA  
2,PIK3CA,PKHD1,PL  
D1,PLXNA2,PNKD,P  
NRC1,POR,PPIF,PP  
P1R1B,PPP1R3B,PP  
P1R9A,PPP2R1A,PR  
PF39,PRPF6,PSEN2,  
PSMD1,PSMD2,PTB  
P1,PTBP2,PXMP4,R  
AB11FIP2,RABEPK,R  
ABGAP1L,RAI14,RAL  
GPS2,RASA3,RB1CC  
1,RBBP5,RBBP7,RC  
AN1,RCL1,REPIN1,R  
GS2,RHOD,RICTOR,  
RNF14,RNF144A,RO  
CK1,RPIA,SBF2,SCA  
PER,SCARB2,SCYL1  
,SDC4,SDR42E1,SE  
C63,SECISBP2L,SEN  
P6,SERPINA6,SERPI  
NE2,SESN3,SETDB2  
,SFRP5,SHPRH,SIRT  
5,SLC16A5,SLC1A4,  
SLC20A1,SLC20A2,S  
LC25A32,SLC2A2,SL  
C2A9,SLC38A2,SLC3  
9A10,SLC39A8,SLC6  
A12,SLC9A3R1,SLK,  
SMAD7,SMAP1,SNR  
NP200,SNTB1,SNX1  
0,SOD2,SPARC,SPG  
21,SPOP,SPTBN1,S  
PTBN2,ST3GAL4,ST  
ARD7,STK24,STK40,  
STOM,STT3B,STX8,  
STXBP3,SULF2,SYN  
E1,TBC1D16,TBC1D  
20,TBC1D24,TCP1,T  
EP1,TEX2,THRSP,TI  
FA,TIGD2,TIMM44,T  
K1,TLE1,TMEM126A,  
TMEM51,TMEM97,T  
NFAIP2,TNRC6A,TO  
P1MT,TPI1,TPR,TPR  
G1L,TRIB3,TRMT1,T  
SPAN33,TTC1,TUBB,  
TUBB6,TXNL1,UBAC  
1,UBE2F,UBR1,UGP  
2,UGT2B10,UROC1,  
UROD,USP47,UTP14

|                                                  |                       |                       |          |        |                                                                                                                                                                                                                                                                                                                                                                                                                                                                                                                                                                                                                                                                                                                                                                                                                                                                                                                                                                                                                                                                                                                                                                                                                                                                                          |     |
|--------------------------------------------------|-----------------------|-----------------------|----------|--------|------------------------------------------------------------------------------------------------------------------------------------------------------------------------------------------------------------------------------------------------------------------------------------------------------------------------------------------------------------------------------------------------------------------------------------------------------------------------------------------------------------------------------------------------------------------------------------------------------------------------------------------------------------------------------------------------------------------------------------------------------------------------------------------------------------------------------------------------------------------------------------------------------------------------------------------------------------------------------------------------------------------------------------------------------------------------------------------------------------------------------------------------------------------------------------------------------------------------------------------------------------------------------------------|-----|
| Cancer,Organismal<br>Injury And<br>Abnormalities | Abdominal<br>Neoplasm | Abdominal<br>Neoplasm | 1.91E-24 | -2.159 | A,UTRN,UXS1,VPS1<br>3A,WIPI2,WNT5B,YP<br>EL3,YWHAH,ZCCHC<br>24,ZFAND2B,ZKSCA<br>N1,ZNF23,ZNF32,ZN<br>F654<br>AASDH,ABCB1,ABC<br>B4,ABCG2,ABCG5,A<br>BCG8,ABTB2,ACAD8<br>,ACAT2,ACLY,ACOX<br>2,ACSL3,ACSL4,ACS<br>L5,ACSM1,ACSM5,A<br>CSS2,ACTR6,ADH4,<br>AFG3L2,AGPAT2,AH<br>CY,AHNAK,AHSA1,A<br>KAP11,AKAP9,AKR1<br>D1,ALAS1,ALDH1L1,<br>ALG13,AMDHD1,AN<br>KRD12,ANP32A,ANX<br>A7,ARF3,ARGLU1,A<br>RHGAP18,ARHGAP2<br>1,ARHGAP6,ARIH2,A<br>RL15,ARL6IP4,ARSG<br>,ASAP2,ASB13,ATG3<br>,ATG4D,ATP1A1,ATP<br>1B1,ATP6V1D,ATXN<br>2L,AUH,BAAT,BAP1,<br>BDH1,BHMT,BHMT2,<br>BID,BIK,BLMH,BRD8,<br>BUD23,C11orf54,C9o<br>rf152,C9orf16,CA3,C<br>AMKK2,CAPN2,CAR<br>S1,CBLB,CCBE1,CC<br>DC66,CCT3,CCT4,C<br>CT5,CCT6A,CCT7,C<br>D2AP,CD47,CD9,CD<br>99L2,CDA,CDC14B,C<br>DH1,CDH2,CDO1,CE<br>BPD,CENPV,CES1,C<br>GN,CHCHD3,CHCHD<br>4,CHD6,CHPT1,CHR<br>AC1,CIB3,CITED2,CL<br>DND1,CLK2,CLMN,C<br>LOCK,CMTM6,CMTM<br>8,CNOT4,CNOT6,CN<br>P,COL27A1,COL5A3,<br>CORO1B,CPEB4,CP<br>T1A,CRIP2,CROT,CS<br>,CSRNP1,CTDSP1,C<br>TPS2,CTSH,CUL4B,<br>CXADR,CYLD,CYP2<br>U1,CYP39A1,CYP4F<br>2,CYP7A1,CYTH1,DA<br>ZAP1,DCTN1,DDC,D<br>DX60,DEK,DGKZ,DH<br>X9,DIAPH2,DICER1,<br>DIO1,DIPK2A,DIXDC<br>1,DMD,DMTF1,DNAJ<br>C5,DOCK4,DPP4,DP<br>P9,DSP,DSTN,DUSP<br>19,DVL1,E2F5,ECHD<br>C1,ECHDC3,EPPD1, | 558 |
|--------------------------------------------------|-----------------------|-----------------------|----------|--------|------------------------------------------------------------------------------------------------------------------------------------------------------------------------------------------------------------------------------------------------------------------------------------------------------------------------------------------------------------------------------------------------------------------------------------------------------------------------------------------------------------------------------------------------------------------------------------------------------------------------------------------------------------------------------------------------------------------------------------------------------------------------------------------------------------------------------------------------------------------------------------------------------------------------------------------------------------------------------------------------------------------------------------------------------------------------------------------------------------------------------------------------------------------------------------------------------------------------------------------------------------------------------------------|-----|

EFHD2,EGR1,EIF1A  
X,EIF4EBP1,ELF1,E  
NPP1,ERBB3,ESRRA  
,EXOC6,EXOSC2,EX  
TL2,F11,F2R,F3,FAD  
S2,FAM102A,FAM16  
0B1,FAM172A,FAM8  
9A,FBXO9,FECH,FG  
A,FGB,FGFR2,FGFR  
L1,FGG,FH,FKBP4,F  
LCN,FMO1,FMO5,FO  
XK1,FOXO3,FPGS,F  
TSJ3,G6PD,GABARA  
P,GAS2L3,GCAT,GC  
LC,GCNT2,GDA,GNA  
12,GNG12,GOLGB1,  
GPD2,GPN1,GRHPR,  
GSDMD,GSK3A,GSS  
,GSTM2,GTF2A2,GT  
F2F1,GTF3C2,GYG1,  
HECA,HECTD3,HER  
C4,HLF,HMG20B,HM  
GCR,HNRNPC,HNR  
NPD,HOMER2,HOO  
K1,HRAS,HSD17B2,H  
SD3B7,HSPB1,ICK,I  
D2,ID4,IGFBP2,IL18,I  
NG4,IRF6,IRS1,ITPA,  
ITPK1,JAK2,JMJD1C,  
KAT2B,KCMF1,KDM6  
A,KEAP1,KIAA0100,K  
ITLG,KLF12,KLF9,KL  
HDC2,KLHL21,KLHL  
7,KPNB1,KTN1,KYN  
U,L2HGDH,LARS2,L  
GALS4,LGR5,LIN7A,  
LIN7C,LITAF,LMNA,L  
PIN1,LRIG1,LRP12,L  
RRC28,LRRC3,LSM1  
4B,LSS,LTBR,MACR  
OH2A1,MAGED1,MA  
GI3,MAP1LC3B,MAP  
2K3,MAP3K7,MBNL2,  
MCOLN1,MEF2A,MIA  
2,MKNK2,MLLT10,ML  
X,MMD,MOCOS,MO  
N2,MPDZ,MPP1,MPR  
IP,MRNIP,MRPL12,M  
RPL20,MRPL24,MRP  
L44,MRPS22,MRPS2  
5,MRPS27,MRPS9,M  
T1F,MYO1B,MYO5B,  
MYO6,N4BP2,N4BP2  
L1,NAGK,NCALD,NC  
OA1,NDUFA12,NDUF  
A9,NEK7,NET1,NFKB  
IA,NGEF,NHLRC2,NI  
NJ1,NIPBL,NME1,NO  
SIP,NPC1,NR1H4,NR  
2F6,NR3C2,NR5A2,N  
RIP1,NT5C,NUDT1,N  
UDT19,NUDT7,NUP6



2,NUP88,OAZ1,OSB  
PL1A,OTUD6B,OXR1  
,PALMD,PAN2,PAN3,  
PAQR9,PCDH1,PCG  
F5,PDCD2,PDE2A,P  
DE9A,PDGFC,PDGF  
RB,PDLIM1,PDP2,PD  
PK1,PDRG1,PER1,P  
ER3,PEX26,PEX6,PF  
DN2,PGAP1,PHF20L  
1,PHKA2,PIK3AP1,PI  
K3CA,PKHD1,PLD1,  
PLXNA2,PMPCA,PN  
KD,PNRC1,POLE4,P  
OR,PPIF,PPM1A,PP  
OX,PPP1R12A,PPP1  
R14B,PPP1R1B,PPP  
1R3B,PPP1R9A,PPP  
2R1A,PRDX6,PRPF3  
9,PRPF6,PRPS1,PSE  
N2,PSMA6,PSMD1,P  
SMD11,PSMD2,PSM  
D8,PSMF1,PSPC1,P  
SPH,PTBP1,PTBP2,P  
XMP4,QDPR,RAB11  
FIP2,RABEPK,RABG  
AP1L,RAI14,RALGPS  
2,RAN,RASA3,RASS  
F3,RB1CC1,RBBP5,  
RBBP7,RCAN1,RCL1  
,REPIN1,RGS2,RHB  
DD1,RHOD,RICTOR,  
RNF144A,RNF167,R  
OCK1,RPA1,RPIA,R  
UFY3,SAA4,SAR1B,S  
ARS1,SBF2,SCAPER  
,SCARB2,SCYL1,SD  
C4,SDR42E1,SEC63,  
SECISBP2L,SENP6,  
SERPINA6,SERPINE  
2,SERPINH1,SESN3,  
SETDB2,SFRP5,SGK  
2,SGTB,SH3D19,SH  
MT1,SHPRH,SIRT5,S  
LC10A1,SLC16A5,SL  
C1A4,SLC20A1,SLC2  
0A2,SLC25A32,SLC2  
7A2,SLC2A2,SLC2A5  
,SLC2A9,SLC30A10,  
SLC35B1,SLC35B3,S  
LC38A2,SLC39A10,S  
LC39A8,SLC6A12,SL  
C9A3R1,SLK,SMAD7  
,SMAP1,SNAPC2,SN  
RNP200,SNTB1,SNX  
10,SNX9,SOAT2,SO  
D2,SPARC,SPG21,S  
PON2,SPOP,SPTBN  
1,SPTBN2,ST3GAL4,  
STARD7,STIP1,STK2  
4,STK40,STOM,STT3  
B,STX8,STXBP3,SUL

|                     |           |                          |          |        |                                                                                                                                                                                                                                                                                                                                                                                                                                                                                                                                                                                                                                                |     |
|---------------------|-----------|--------------------------|----------|--------|------------------------------------------------------------------------------------------------------------------------------------------------------------------------------------------------------------------------------------------------------------------------------------------------------------------------------------------------------------------------------------------------------------------------------------------------------------------------------------------------------------------------------------------------------------------------------------------------------------------------------------------------|-----|
|                     |           |                          |          |        | F2,SUMF1,SYAP1,S<br>YNE1,SYT1,TBC1D1<br>6,TBC1D20,TBC1D24<br>,TBRG4,TCIM,TCP1,<br>TEP1,TEX2,THAP4,T<br>HRSP,TIGD2,TIMM4<br>4,TK1,TLCD4,TLE1,T<br>MBIM1,TMEM126A,T<br>MEM219,TMEM41A,T<br>MEM41B,TMEM51,T<br>MEM62,TMEM97,TN<br>FAIP2,TNFAIP8L1,TN<br>RC6A,TOP1MT,TPI1,<br>TPR,TPRG1L,TPRKB<br>,TRIB3,TRMT1,TSN,T<br>SPAN33,TTC1,TTC1<br>9,TUBB,TUBB6,TUB<br>GCP2,TXNL1,UBAC1<br>,UBE2F,UBE2L3,UBR<br>1,UBTF,UBXN1,UBX<br>N6,UCK1,UGP2,UGT<br>2B10,ULK1,UNG,UP<br>P2,UROC1,UROD,US<br>P47,UTP14A,UTRN,U<br>XS1,VPS13A,WDR18<br>,WDR26,WDR81,WIP<br>I2,WNT5B,YPEL3,YW<br>HAH,ZCCHC24,ZFAN<br>D2B,ZKSCAN1,ZNF2<br>3,ZNF32,ZNF326,ZN<br>F654       |     |
| Molecular Transport | Transport | Transport Of<br>Molecule | 3.02E-12 | -2.164 | ABC1,ABCB4,ABC<br>G2,ABCG5,ABCG8,A<br>CAT2,ACLY,ACSL3,A<br>CSL4,ACSL5,AFG3L<br>2,ANP32A,AQP11,AR<br>F3,ATP1A1,ATP1B1,<br>ATP6V1D,BET1,CA3,<br>CBLB,CD2AP,CDH1,<br>CES1,CHCHD4,CITE<br>D2,CMTM6,CNP,CPT<br>1A,CROT,CYP7A1,C<br>YTH1,DCTN1,DDC,D<br>GKZ,DNAJC5,DVL1,<br>EGR1,ENPP1,ERBB3<br>,F2R,FECH,FGA,FGB<br>,FGG,FH,FKBP4,FOX<br>O3,GABARAP,GSK3<br>A,HMGCR,HNRNPD,<br>HOOK1,HRAS,HSD1<br>7B2,IRS1,JAK2,KPN<br>B1,LIN7A,LIN7C,LMN<br>A,LSS,MAP2K3,MEF<br>2A,MLX,MYO5B,MYO<br>6,NFKBIA,NPC1,NR1<br>H4,NR3C2,NR5A2,N<br>UP62,NUP88,OGA,O<br>SBPL1A,PDGFRB,PD<br>PK1,PER1,PEX26,PE<br>X6,PGAP1,PIK3CA,P<br>MPCA,PNKD,PPP1R<br>3B,PRDX6,PSEN2,R | 129 |

|                                             |                  |                  |          |        |                                                                                                                                                                                                                                                                                                                                                                                                                                                                                                                                                                                                                                                                                                                                                                                                                                                                                                                                                                                                                                                                                                                                                                                                                  |     |
|---------------------------------------------|------------------|------------------|----------|--------|------------------------------------------------------------------------------------------------------------------------------------------------------------------------------------------------------------------------------------------------------------------------------------------------------------------------------------------------------------------------------------------------------------------------------------------------------------------------------------------------------------------------------------------------------------------------------------------------------------------------------------------------------------------------------------------------------------------------------------------------------------------------------------------------------------------------------------------------------------------------------------------------------------------------------------------------------------------------------------------------------------------------------------------------------------------------------------------------------------------------------------------------------------------------------------------------------------------|-----|
| Cancer, Organismal Injury And Abnormalities | Abdominal Cancer | Abdominal Cancer | 1,60E-23 | -2,169 | AN, REPIN1, RHBDD1, RICTOR, ROCK1, SCARB2, SERPINA6, SGK2, SLC10A1, SLC1A4, SLC20A1, SLC20A2, SLC27A2, SLC2A2, SLC2A5, SLC2A9, SLC30A10, SLC35A3, SLC38A2, SLC38A3, SLC39A10, SLC39A8, SLC6A12, SLC9A3R1, SNTB1, SNX10, SNX9, SOAT2, SOD2, SPTBN2, STAR, STX18, STX7, STX8, STXBP3, SYT1, TIMM44, TPR, TRIB3, UROD, VPS11, YWHAH AASDH, ABCB1, ABCB4, ABCG2, ABCG5, ABCG8, ABTB2, ACAD8, ACAT2, ACLY, ACOX2, ACSL3, ACSL4, ACSL5, ACSM1, ACSM5, ACSS2, ACTR6, ADH4, AFG3L2, AGPAT2, AH1CY, AHNK, AHNK1, AKAP11, AKAP9, AKR1D1, ALAS1, ALDH1L1, ALG13, AMDHD1, ANKRD12, ANP32A, ANXA7, ARF3, ARGLU1, ARHGAP18, ARHGAP21, ARHGAP6, ARIH2, ARL15, ARL6IP4, ARSG, ASAP2, ASB13, ATG3, ATG4D, ATP1A1, ATP1B1, ATP6V1D, ATXN2L, AUH, BAAT, BAP1, BDH1, BHMT, BHMT2, BID, BIK, BLMH, BRD8, BUD23, C11orf54, C9orf152, CA3, CAMKK2, CAPN2, CARS1, CBLB, CCBE1, CCDC66, CCT3, CCT4, CCT5, CCT6A, CCT7, CD2AP, CD47, CD9, CD99L2, CDA, CDC14B, CDH1, CDH2, CDO1, CEBPD, CENPV, CES1, CGN, CHCHD3, CHCHD4, CHD6, CHPT1, CHRA1, CIB3, CITED2, CLDN1, CLK2, CLMN, CLOCK, CMT6, CMT8, CNOT4, CNOT6, CNP, COL27A1, COL5A3, CORO1B, CPEB4, CPT1A, CRIP2, CROT, CS, CSRP1, CTDSP1, CTPS2, CTSN, CUL4B, CXADR, CYLD, CYP2U1, CYP39 | 551 |
|---------------------------------------------|------------------|------------------|----------|--------|------------------------------------------------------------------------------------------------------------------------------------------------------------------------------------------------------------------------------------------------------------------------------------------------------------------------------------------------------------------------------------------------------------------------------------------------------------------------------------------------------------------------------------------------------------------------------------------------------------------------------------------------------------------------------------------------------------------------------------------------------------------------------------------------------------------------------------------------------------------------------------------------------------------------------------------------------------------------------------------------------------------------------------------------------------------------------------------------------------------------------------------------------------------------------------------------------------------|-----|

A1,CYP4F2,CYP7A1,  
CYTH1,DAZAP1,DCT  
N1,DDC,DDX60,DEK,  
DGKZ,DHX9,DIAPH2,  
DICER1,DIO1,DIPK2  
A,DIXDC1,DMD,DMT  
F1,DNAJC5,DOCK4,  
DPP4,DPP9,DSP,DS  
TN,DUSP19,DVL1,E2  
F5,ECHDC1,EEPD1,  
EFHD2,EGR1,EIF1A  
X,EIF4EBP1,ELF1,E  
NPP1,ERBB3,ESRRA  
,EXOC6,EXOSC2,EX  
TL2,F11,F2R,F3,FAD  
S2,FAM102A,FAM16  
0B1,FAM172A,FAM8  
9A,FBXO9,FECH,FG  
A,FGB,FGFR2,FGFR  
L1,FGG,FH,FKBP4,F  
LCN,FMO1,FMO5,FO  
XK1,FOXO3,FPGS,F  
TSJ3,G6PD,GABARA  
P,GAS2L3,GCAT,GC  
LC,GCNT2,GDA,GNA  
12,GNG12,GOLGB1,  
GPD2,GPN1,GRHPR,  
GSDMD,GSK3A,GSS  
,GSTM2,GTF2A2,GT  
F2F1,GTF3C2,GYG1,  
HECA,HECTD3,HER  
C4,HLF,HMG20B,HM  
GCR,HNRNPC,HNR  
NPD,HOMER2,HOO  
K1,HRAS,HSD17B2,H  
SD3B7,HSPB1,ICK,I  
D2,ID4,IGFBP2,IL18,I  
NG4,IRF6,IRS1,ITPA,  
ITPK1,JAK2,JMJD1C,  
KAT2B,KCMF1,KDM6  
A,KEAP1,KIAA0100,K  
ITLG,KLF12,KLF9,KL  
HDC2,KLHL21,KLHL  
7,KPNB1,KTN1,KYN  
U,L2HGDH,LARS2,L  
GALS4,LGR5,LIN7A,  
LIN7C,LITAF,LMNA,L  
PIN1,LRIG1,LRP12,L  
RRC28,LRRC3,LSM1  
4B,LSS,LTBR,MACR  
OH2A1,MAGED1,MA  
GI3,MAP1LC3B,MAP  
2K3,MAP3K7,MBNL2,  
MCOLN1,MEF2A,MIA  
2,MKNK2,MLLT10,ML  
X,MMD,MOCOS,MO  
N2,MPDZ,MPP1,MPR  
IP,MRNIP,MRPL12,M  
RPL20,MRPL24,MRP  
L44,MRPS22,MRPS2  
5,MRPS27,MRPS9,M  
T1F,MYO1B,MYO5B,

MYO6,N4BP2,N4BP2  
L1,NAGK,NCALD,NC  
OA1,NDUFA12,NDUF  
A9,NEK7,NET1,NFKB  
IA,NGEF,NHLRC2,NI  
NJ1,NIPBL,NME1,NO  
SIP,NPC1,NR1H4,NR  
2F6,NR3C2,NR5A2,N  
RIP1,NT5C,NUDT1,N  
UDT19,NUDT7,NUP6  
2,NUP88,OAZ1,OSB  
PL1A,OTUD6B,OXR1  
,PALMD,PAN2,PAN3,  
PAQR9,PCDH1,PCG  
F5,PDCD2,PDE2A,P  
DE9A,PDGFC,PDGF  
RB,PDLIM1,PDP2,PD  
PK1,PDRG1,PER1,P  
ER3,PEX26,PEX6,PF  
DN2,PGAP1,PHF20L  
1,PHKA2,PIK3AP1,PI  
K3CA,PKHD1,PLD1,  
PLXNA2,PMPCA,PN  
KD,PNRC1,POLE4,P  
OR,PPIF,PPM1A,PP  
OX,PPP1R12A,PPP1  
R14B,PPP1R1B,PPP  
1R3B,PPP1R9A,PPP  
2R1A,PRPF39,PRPF  
6,PRPS1,PSEN2,PS  
MD1,PSMD11,PSMD  
2,PSMD8,PSMF1,PS  
PC1,PSPH,PTBP1,P  
TBP2,PXMP4,QDPR,  
RAB11FIP2,RABEPK,  
RABGAP1L,RAI14,R  
ALGPS2,RAN,RASA3  
,RASSF3,RB1CC1,R  
BBP5,RBBP7,RCAN1  
,RCL1,REPIN1,RGS2  
,RHBDD1,RHOD,RIC  
TOR,RNF144A,RNF1  
67,ROCK1,RPA1,RPI  
A,RUFY3,SAA4,SAR  
1B,SARS1,SBF2,SCA  
PER,SCARB2,SCYL1  
,SDC4,SDR42E1,SE  
C63,SECISBP2L,SEN  
P6,SERPINA6,SERPI  
NE2,SERPINH1,SES  
N3,SETDB2,SFRP5,S  
GK2,SGTB,SH3D19,  
SHMT1,SHPRH,SIRT  
5,SLC10A1,SLC16A5  
,SLC1A4,SLC20A1,S  
LC20A2,SLC25A32,S  
LC27A2,SLC2A2,SLC  
2A5,SLC2A9,SLC35B  
3,SLC38A2,SLC39A1  
0,SLC39A8,SLC6A12  
,SLC9A3R1,SLK,SMA  
D7,SMAP1,SNAPC2,

|                      |                                        |                                        |          |        |                                                                                                                                                                                                                                                                                                                                                                                                                                                                                                                                                                                                                                                                                                                                                                                                                                                                                                                                                                                                                                                                                                                                                                                                                                                                                                           |    |
|----------------------|----------------------------------------|----------------------------------------|----------|--------|-----------------------------------------------------------------------------------------------------------------------------------------------------------------------------------------------------------------------------------------------------------------------------------------------------------------------------------------------------------------------------------------------------------------------------------------------------------------------------------------------------------------------------------------------------------------------------------------------------------------------------------------------------------------------------------------------------------------------------------------------------------------------------------------------------------------------------------------------------------------------------------------------------------------------------------------------------------------------------------------------------------------------------------------------------------------------------------------------------------------------------------------------------------------------------------------------------------------------------------------------------------------------------------------------------------|----|
| Neurological Disease | Motor Dysfunction Or Movement Disorder | Motor Dysfunction Or Movement Disorder | 5.12E-08 | -2.191 | SNRNP200,SNTB1,S<br>NX10,SNX9,SOAT2,S<br>OD2,SPARC,SPG21,<br>SPON2,SPOP,SPTB<br>N1,SPTBN2,ST3GAL<br>4,STARD7,STIP1,ST<br>K24,STK40,STOM,ST<br>T3B,STX8,STXBP3,S<br>ULF2,SUMF1,SYAP1,<br>SYNE1,SYT1,TBC1D<br>16,TBC1D20,TBC1D2<br>4,TBRG4,TCIM,TCP1<br>,TEP1,TEX2,THAP4,<br>THRSP,TIGD2,TIMM<br>44,TK1,TLE1,TMBIM<br>1,TMEM126A,TMEM2<br>19,TMEM41A,TMEM4<br>1B,TMEM51,TMEM62<br>,TMEM97,TNFAIP2,T<br>NFAIP8L1,TNRC6A,T<br>OP1MT,TPI1,TPR,TP<br>RG1L,TPRKB,TRIB3,<br>TRMT1,TSN,TSPAN3<br>3,TTC1,TTC19,TUBB,<br>TUBB6,TUBGCP2,TX<br>NL1,UBAC1,UBE2F,<br>UBE2L3,UBR1,UBTF,<br>UBXN1,UBXN6,UCK1<br>,UGP2,UGT2B10,UL<br>K1,UNG,UPP2,UROC<br>1,UROD,USP47,UTP<br>14A,UTRN,UXS1,VP<br>S13A,WDR18,WDR2<br>6,WDR81,WIP1,WNT<br>5B,YPEL3,YWHAH,Z<br>CCHC24,ZFAND2B,Z<br>KSCAN1,ZNF23,ZNF<br>32,ZNF326,ZNF654<br>ABCB1,AFG3L2,AHC<br>Y,ALAS1,ALG13,ARI<br>H2,ATP1B1,BID,CA3,<br>CAMKK2,CDH2,CDO<br>1,CHD6,CNP,CYTH1,<br>DDC,DGKZ,DICER1,<br>DIXDC1,DNAJB1,DN<br>AJC5,E2F5,EGR1,EN<br>PP1,ERBB3,F3,FGFR<br>L1,FGG,FKBP4,FOX<br>O3,HMGCR,HRAS,H<br>SPB1,ID4,IL18,ITPA,J<br>MJD1C,LGR5,LMNA,<br>MBNL2,MCOLN1,MP<br>DZ,MYO1B,NGEF,NI<br>NJ1,NME1,NPC1,NU<br>DT1,NUP62,OXR1,P<br>DCD2,PDLIM1,PDPK<br>1,PFKFB1,PLXNA2,P<br>MPCA,PNKD,PPP1R<br>1B,PRDX6,PTBP2,R<br>AN,RCAN1,RGS2,SA<br>RS1,SCARB2,SCOC,<br>SCYL1,SDC4,SERPI | 86 |
|----------------------|----------------------------------------|----------------------------------------|----------|--------|-----------------------------------------------------------------------------------------------------------------------------------------------------------------------------------------------------------------------------------------------------------------------------------------------------------------------------------------------------------------------------------------------------------------------------------------------------------------------------------------------------------------------------------------------------------------------------------------------------------------------------------------------------------------------------------------------------------------------------------------------------------------------------------------------------------------------------------------------------------------------------------------------------------------------------------------------------------------------------------------------------------------------------------------------------------------------------------------------------------------------------------------------------------------------------------------------------------------------------------------------------------------------------------------------------------|----|

|                                            |                          |                          |          |        |                                                                                                                                                                                                                                                                                                                                                                                                                                                                                           |     |
|--------------------------------------------|--------------------------|--------------------------|----------|--------|-------------------------------------------------------------------------------------------------------------------------------------------------------------------------------------------------------------------------------------------------------------------------------------------------------------------------------------------------------------------------------------------------------------------------------------------------------------------------------------------|-----|
| Neurological Disease                       | Movement Disorder        | Movement Disorders       | 4.11E-07 | -2.37  | NE2,SGTB,SLC1A4,SLC30A10,SOD2,SPTBN2,STARD4,STOM,SYNE1,SYT1,TBC1D24,TPI1,TRIB3,TSN,UBAC1,VPS13A,WDR26,WDR81                                                                                                                                                                                                                                                                                                                                                                               | 82  |
|                                            |                          |                          |          |        | ABCB1,AFG3L2,AHCY,ALAS1,ALG13,ARIH2,ATP1B1,BID,CA3,CAMKK2,CDH2,CNP,CYTH1,DDC,DGKZ,DICER1,DIXDC1,DNAJB1,DNAJC5,E2F5,EGFR1,ERBB3,F3,FGFRL1,FGG,FKBP4,FOXO3,HMGCR,HRAS,HSPB1,ID4,IL18,ITPA,JMJD1C,LGR5,LMNA,MBNL2,MCOLN1,MPDZ,MYO1B,NGEF,NJ1,NME1,NPC1,NUDT1,NUP62,OXR1,PDCD2,PDLIM1,PDPK1,PFKFB1,PLXNA2,PMPCA,PNKD,PPP1R1B,PRDX6,PTBP2,RAN,RCAN1,RGS2,SAARS1,SCARB2,SCOC,SCYL1,SDC4,SGTB,SLC1A4,SLC30A10,SOD2,SPTBN2,STARD4,STOM,SYNE1,SYT1,TBC1D24,TPI1,TRIB3,TSN,UBAC1,VPS13A,WDR26,WDR81 |     |
| Cancer,Organismal Injury And Abnormalities | Extracranial Solid Tumor | Extracranial Solid Tumor | 3.07E-29 | -2.464 | AASDH,ABCB1,ABCB4,ABCG2,ABCG5,ABCG8,ABTB2,ACAD8,ACAT2,ACLY,ACOX2,ACSL3,ACSL4,ACSL5,ACSM1,ACSM5,ACSS2,ACTR6,ADH4,AFG3L2,AGPAT2,AHCY,AHNAK,AHSA1,AKAP11,AKAP9,AKR1D1,ALAS1,ALDH1L1,ALG13,AMDHD1,ANKRD12,ANP32A,ANXA7,ARF3,ARGLU1,ARRHGAP18,ARRHGAP21,ARRHGAP6,ARRIH2,ARRL15,ARRL4A,ARRL6IP4,ARRSG,ARRSAP2,ARRSB13,ARRTG3,ARRTG4D,ARRTP1A1,ARRTP1B1,ARRTP6V1D,ARRTXN2L,ARRUH,BAA1T,BAP1,BDH1,BHMT,BHMT2,BID,BIK,BLMH,BRD8,BUD23,C11orf54,C9orf152,C9orf16,CA3,CAMKK2,CAP                     | 596 |

N2,CARS1,CBLB,CC  
BE1,CCDC66,CCT3,  
CCT4,CCT5,CCT6A,  
CCT7,CD2AP,CD47,  
CD9,CD99L2,CDA,C  
DC14B,CDH1,CDH2,  
CDO1,CEBPD,CENP  
V,CES1,CGN,CHCH  
D3,CHCHD4,CHD6,C  
HPT1,CHRA1,CIB3,  
CITED2,CLDND1,CL  
K2,CLMN,CLOCK,CL  
TA,CMTM6,CMTM8,  
CNN3,CNOT4,CNOT  
6,CNP,COL27A1,CO  
L5A3,CORO1B,CPEB  
4,CPT1A,CRIP2,CRL  
S1,CROT,CS,CSRNP  
1,CTDSP1,CTPS2,CT  
SH,CUL4B,CXADR,C  
YB5B,CYLD,CYP2U1  
,CYP39A1,CYP4F2,C  
YP7A1,CYTH1,DAZA  
P1,DCTN1,DDC,DDX  
60,DEK,DGKZ,DHX9,  
DIAPH2,DICER1,DIO  
1,DIPK2A,DIXDC1,D  
MD,DMTF1,DNAJB1,  
DNAJC5,DOCK4,DP  
P4,DPP9,DSP,DSTN,  
DTYMK,DUSP19,DVL  
1,E2F5,ECHDC1,EC  
HDC3,EEPD1,EFHD2  
,EGR1,EIF1AX,EIF4E  
BP1,ELF1,ELOVL6,E  
NDOG,ENPP1,ERBB  
3,ESRRA,EXOC6,EX  
OSC2,EXTL2,F11,F2  
R,F3,FADS2,FAM102  
A,FAM118B,FAM160  
B1,FAM172A,FAM76  
B,FAM89A,FBXO31,F  
BXO9,FECH,FGA,FG  
B,FGFR2,FGFRL1,F  
GG,FH,FKBP4,FLCN,  
FMO1,FMO5,FOXK1,  
FOXO3,FPGS,FTSJ3,  
G6PD,GABARAP,GA  
S2L3,GCAT,GCLC,G  
CNT2,GDA,GNA12,G  
NG12,GOLGB1,GPD  
2,GPN1,GRHPR,GSD  
MD,GSK3A,GSS,GST  
M2,GTF2A2,GTF2F1,  
GTF3C2,GYG1,HEC  
A,HECTD3,HERC4,H  
LF,HMG20B,HMGCR,  
HNRNPC,HNRNPD,H  
OMER2,HOK1,HRA  
S,HSD17B2,HSD3B7,  
HSPB1,ICK,ID2,ID4,I  
GFBP2,IL18,ING4,IR



F6,IRS1,ITPA,ITPK1,  
JAK2,JMJD1C,KAT2  
B,KCMF1,KDM6A,KE  
AP1,KHK,KIAA0100,  
KITLG,KLF12,KLF9,K  
LHDC2,KLHL21,KLH  
L7,KPNB1,KTN1,KYN  
U,L2HGDH,LARS2,L  
GALS4,LGR5,LIN7A,  
LIN7C,LITAF,LMNA,L  
PIN1,LRIG1,LRP12,L  
RRC28,LRRC3,LSM1  
4B,LSS,LTBR,MACR  
OH2A1,MAGED1,MA  
GI3,MAP1LC3B,MAP  
2K3,MAP3K7,MBNL2,  
MCOLN1,MEF2A,MIA  
2,MKNK2,MLLT10,ML  
X,MMD,MOCOS,MO  
N2,MPDZ,MPP1,MPR  
IP,MRNIP,MRPL12,M  
RPL20,MRPL24,MRP  
L34,MRPL44,MRPS2  
2,MRPS25,MRPS27,  
MRPS9,MT1F,MYO1  
B,MYO5B,MYO6,N4B  
P2,N4BP2L1,NAGK,N  
CALD,NCOA1,NDUF  
A12,NDUFA9,NDUFB  
9,NEK7,NET1,NFKBI  
A,NGEF,NHLRC2,NI  
CN1,NINJ1,NIPBL,N  
ME1,NOP10,NOSIP,  
NPC1,NR1H4,NR2F6  
,NR3C2,NR5A2,NRIP  
1,NT5C,NUDT1,NUD  
T19,NUDT7,NUP62,N  
UP88,NUS1,OAZ1,O  
SBPL1A,OTUD6B,OX  
R1,PALMD,PAN2,PA  
N3,PAQR9,PCDH1,P  
CGF5,PDCD2,PDE2A  
,PDE9A,PDGFC,PDG  
FRB,PDLIM1,PDP2,P  
DPK1,PDRG1,PER1,  
PER3,PES1,PEX26,P  
EX6,PFDN2,PFKFB1,  
PGAP1,PHF20L1,PH  
KA2,PIK3AP1,PIK3C  
A,PKHD1,PLD1,PLX  
NA2,PMPCA,PNKD,P  
NRC1,POLE4,POR,P  
PIF,PPM1A,PPOX,PP  
P1R12A,PPP1R14B,  
PPP1R1B,PPP1R3B,  
PPP1R9A,PPP2R1A,  
PRDX6,PRPF19,PRP  
F39,PRPF6,PRPS1,P  
RPS2,PSEN2,PSMA6  
,PSMD1,PSMD11,PS  
MD2,PSMD8,PSME2,  
PSMF1,PSMG1,PSP

C1,PSPH,PTBP1,PT  
BP2,PXMP4,QDPR,R  
AB11FIP2,RAB1B,RA  
BEPK,RABGAP1L,RA  
I14,RALGPS2,RAN,R  
ASA3,RASSF3,RB1C  
C1,RBBP5,RBBP7,R  
BKS,RCAN1,RCL1,R  
EPIN1,RGS2,RHBDD  
1,RHOD,RICTOR,RN  
F14,RNF144A,RNF16  
7,ROCK1,RPA1,RPIA  
,RUFY3,SAA4,SAR1  
B,SARS1,SBF2,SCA  
PER,SCARB2,SCGN,  
SCOC,SCYL1,SDC4,  
SDR42E1,SEC63,SE  
CISBP2L,SENP6,SE  
RPINA6,SERPINE2,S  
ERPINH1,SESN3,SE  
TDB2,SFRP5,SGK2,  
SGTB,SH3BGR2,SH  
3D19,SHMT1,SHPRH  
,SIRT5,SLC10A1,SLC  
16A5,SLC1A4,SLC20  
A1,SLC20A2,SLC25A  
32,SLC27A2,SLC2A2  
,SLC2A5,SLC2A9,SL  
C30A10,SLC35A3,SL  
C35B1,SLC35B3,SLC  
38A2,SLC39A10,SLC  
39A8,SLC6A12,SLC9  
A3R1,SLK,SMAD7,S  
MAP1,SNAPC2,SNR  
NP200,SNTB1,SNX1  
0,SNX5,SNX9,SOAT2  
,SOD2,SPARC,SPG2  
1,SPON2,SPOP,SPT  
BN1,SPTBN2,ST3GA  
L4,STARD4,STARD7,  
STIP1,STK24,STK40,  
STOM,STT3B,STX18,  
STX8,STXBP3,SULF  
2,SUMF1,SYAP1,SY  
NE1,SYT1,TBC1D16,  
TBC1D20,TBC1D24,  
TBRG4,TCIM,TCP1,T  
EP1,TEX2,THAP4,TH  
RSP,TIFA,TIGD2,TIM  
M10,TIMM44,TK1,TL  
CD4,TLE1,TMBIM1,T  
MEM126A,TMEM219,  
TMEM41A,TMEM41B  
,TMEM51,TMEM62,T  
MEM97,TNFAIP2,TN  
FAIP8L1,TNRC6A,TO  
P1MT,TPI1,TPR,TPR  
G1L,TPRKB,TRIB3,T  
RMT1,TSN,TSPAN33  
,TSTA3,TTC1,TTC19,  
TUBB,TUBB6,TUBG  
CP2,TXN2,TXNL1,UB

AC1,UBE2F,UBE2L3,  
UBR1,UBTF,UBXN1,  
UBXN6,UCK1,UGP2,  
UGT2B10,ULK1,UNG  
,UPP2,UROC1,UROD  
,USP47,UTP14A,UTR  
N,UXS1,VPS13A,WD  
R18,WDR26,WDR81,  
WIPI2,WNT5B,YPEL3  
,YWHAH,ZCCHC24,Z  
FAND2B,ZKSCAN1,Z  
NF23,ZNF32,ZNF326  
,ZNF654

An increase in the Z-score value indicates pathway activation, while the decrease in the Z-score indicates pathway inhibition. On a logarithmic scale (-log (p-value)) a P-value equal to 0.05 corresponds to 1.3 and the statistical significance of the result increases with the decrease in p-value and with the increase in - log (p-value) values.
